1 **Original Article**

2 **Low functional but large soil-related variations in growth trajectories characterise the**  
3 **widespread Neotropical tree *Cecropia obtusa* Trécul (Urticaceae)**

4 Running title: **Soil-related phenotypic variability for a widespread tree species**

5 Sébastien Levionnois<sup>1\*</sup>, Niklas Tysklind<sup>2</sup>, Eric Nicolini<sup>3</sup>, Bruno Ferry<sup>4</sup>, Valérie Troispoux<sup>2</sup>,  
6 Gilles Le Moguedec<sup>5</sup>, Hélène Morel<sup>6</sup>, Clément Stahl<sup>2</sup>, Sabrina Coste<sup>7</sup>, Henri Caron<sup>2, 8</sup>, Patrick  
7 Heuret<sup>2, 5\*</sup>

8

9 **1.** CNRS, UMR EcoFoG, AgroParisTech, CIRAD, CNRS, INRA, Université des Antilles,  
10 Université de Guyane, 97310 Kourou, France.

11 **2.** INRA, UMR EcoFoG, AgroParisTech, CIRAD, CNRS, INRA, Université des Antilles,  
12 Université de Guyane, 97310 Kourou, France.

13 **3.** CIRAD, UMR AMAP, CIRAD, CNRS, INRA, IRD, Université de Montpellier, 34398  
14 Montpellier, France.

15 **4.** AgroParisTech, UMR LERFoB, AgroParisTech, INRA, 54280 Champenoux, France.

16 **5.** INRA, UMR AMAP, CIRAD, CNRS, INRA, IRD, Université de Montpellier, 34398  
17 Montpellier, France.

18 **6.** CIRAD, UMR EcoFoG, AgroParisTech, CIRAD, CNRS, INRA, Université des Antilles,  
19 Université de Guyane, 97310 Kourou, France.

20 **7.** Université de Guyane, UMR EcoFoG, AgroParisTech, CIRAD, CNRS, INRA, Université  
21 des Antilles, Université de Guyane, 97310 Kourou, France.

22 **8.** INRA, UMR BIOGECO, INRA, Université de Bordeaux, Cestas, France

23

24 \*Authors for correspondence:

25 Sébastien Levionnois, PhD student

26 Postal adress: UMR EcoFog, Campus Agronomique, Avenue de France

27 BP709 – 97387 Kourou Cedex

28 French Guiana

29 Tel: +33 760 26 73 83

30 Email: [sebastien\\_levionnois@live.fr](mailto:sebastien_levionnois@live.fr)

31

32 Patrick Heuret, PhD

33 Postal adress: UMR AMAP, TA- A-51/PS2 Boulevard de la Lironde

34 34398 Montpellier Cedex 5 (France)

1 French Guiana

2 Tel: +33 467 61 55 14

3 Email: [patrick.heuret@inra.fr](mailto:patrick.heuret@inra.fr)

4

5 **Author contributions**

6 PH designed and led the project. PH, SL, EN, VT, HM, NT, CS, SC, BF and HC .measured

7 tree architecture and functional traits. BF and VT described soils characteristics. SL, PH and

8 GL performed data analysis. SL wrote the manuscript with contributions from PH and NT.

9 All authors contributed critically to the drafts and gave final approval for publication.

10

1 **ABSTRACT**

2 **1.** Environment-driven interspecific functional variability has been convincingly described  
3 across Amazon lowland tree species. However, functional variability has rarely been  
4 addressed at the intraspecific level, especially through one key environmental driver such as  
5 soil composition. In this study, we assess whether patterns of soil-dependent interspecific  
6 variability are retained at the intraspecific level.

7 **2.** We examined phenotypic variability for 16 functional leaf (dimensions, nutrient,  
8 chlorophyll) and wood traits (density) across two soil types, Ferralitic Soil (FS) vs. White  
9 Sands (WS), and on two sites for 70 adult trees of *Cecropia obtusa* Trécul (Urticaceae) in  
10 French Guiana. *Cecropia* is a widespread pioneer Neotropical genus that generally dominates  
11 forest early successional stages. We also examined the architectural development through a  
12 temporal-scaled retrospective analysis and lifespan-level growth trajectories, in order to  
13 evaluate the role of soil phenotypic variability. *Cecropia*'s unique features, such as simple  
14 architecture and growth markers allowed us detailed description of temporal-scaled  
15 retrospective analysis of development.

16 **3.** Functional trait responses to soil types were weak, as only two traits, namely petiole length  
17 and leaf area, exhibited significant differences between the two soil types. Soil effects were  
18 stronger on growth trajectories and tree architectural development, with WS trees having the  
19 slowest growth trajectories -underlined by smaller internode length-, smallest trunk heights  
20 and diameters for a given age, and less numerous branches.

21 **4.** Soil-related functional traits did not mirror the divergence usually found at the interspecific  
22 level. By integrating a dynamic approach based on retrospective analysis of architectural  
23 development to the functional approach to understand tree ecology, here, we demonstrate how  
24 an improved understanding of environmental effects on tree phenotypic variance can be  
25 captured.

26

27 **Key words:** architecture, *Cecropia obtusa*, ferralitic/white-sand soils, functional traits,  
28 growth trajectory, intraspecific variability

## 1 INTRODUCTION

2 In the Amazon forest, abiotic factors such as edaphic conditions are habitat filters and  
3 strong drivers of species distribution (Allié et al., 2015; Baraloto, Morneau, Bonal, Blanc, &  
4 Ferry, 2007; Clark, Palmer, & Clark, 1999; Guitet et al., 2016; John et al., 2007; Kanagaraj,  
5 Wiegand, Comita, & Huth, 2011; Péliissier, Dray, & Sabatier, 2002; Sabatier et al., 1997;  
6 Stropp, Sleen, Assunção, Silva, & Steege, 2011; ter Steege, Jetten, Polak, & Werger, 1993;  
7 Valencia et al., 2004). Two contrasts are generally studied as edaphic factors. First,  
8 bottomland (or valley) *versus* hilltop (or plateau) microhabitats is the most used contrast to  
9 study species and functional turnover. Such environmental heterogeneity is mainly driven by  
10 water availability, as it is explained by topography and soil structure (Allié et al., 2015;  
11 Sabatier et al., 1997). Hilltops experience higher levels of lateral and vertical water drainage  
12 due to slopes and deeper soils (Sabatier et al., 1997). In contrast, bottomlands receive water  
13 draining from slopes and are thus, more prone to seasonal flooding. Moreover, topographical  
14 and hydrological variations are associated with nutrient differences (Allié et al., 2015; Ferry,  
15 Morneau, Bontemps, Blanc, & Freycon, 2010). Hilltop-bottomland heterogeneity impacts  
16 species distribution (Clark et al., 1999; Péliissier et al., 2002; Sabatier et al., 1997; ter Steege  
17 et al., 1993), for which strong species-specific habitat preferences have been shown (Allié et  
18 al., 2015). Evidence for directional across-community differences in functional traits  
19 underlying such spatial patterns is also accruing (Cosme, Schiatti, Costa, & Oliveira, 2017;  
20 Engelbrecht et al., 2007; Fortunel, Paine, Fine, Kraft, & Baraloto, 2014; Fortunel, Ruelle,  
21 Beauchêne, Fine, & Baraloto, 2014; Lopez & Kursar, 2003).

22 Second, the contrast between white-sand (WS) *versus* ferralitic soils (FS) has been  
23 repeatedly used for explaining Amazonian spatial species diversity turnover. WS are mainly  
24 quartz soils, representing 3% to 5% of soils in the Amazon basin and exist as island-like spots  
25 in a matrix of other soils such as FS (Adeney, Christensen, Vicentini, & Cohn-Haft, 2016;  
26 Fine & Baraloto, 2016). Generally, WS are poor in mineral nutrients and acidic, with a low-  
27 usable water reserve and poor nitrogen mineralization, especially in comparison with common  
28 FS. Similar to the hilltop-plateau contrast, FS-WS heterogeneity has strong impacts on species  
29 distribution patterns (Daly, Silveira, Medeiros, Castro, & Obermüller, 2016; Fine & Baraloto,  
30 2016; Stropp et al., 2011; ter Steege et al., 2013). At the community level, WS flora is  
31 characterised by a convergence in functional strategies, particularly towards a conservative  
32 nutrient use strategy (Fine & Baraloto, 2016; Fine, García-Villacorta, Pitman, Mesones, &  
33 Kembel, 2010; Fortunel, Fine, & Baraloto, 2012; Fortunel, Paine, et al., 2014; Fortunel,  
34 Ruelle, et al., 2014; Fyllas et al., 2009; Grubb & Coomes, 1997; Patiño et al., 2009). These

1 imply higher leaf mass area (LMA), higher wood density, smaller seeds, and lower leaf  
2 nutrient contents associated with higher nutrient use efficiency (Fine & Baraloto, 2016), in  
3 comparison with other soil types such as FS.

4 Despite the stark community composition differences among contrasting edaphic  
5 conditions, generalist species (i.e. species able to establish perennial individuals on  
6 contrasting habitats) are common. Species-specific habitat preferences, linked to directional  
7 variations of the functional composition, suggest habitat specialization based on the  
8 evolutionary processes of selection, adaptation, and species divergence. Among the  
9 mechanisms maintaining rainforest species diversity, these processes (selection, adaptation,  
10 divergence) can occur within or between populations or species, even in a sympatric context  
11 (e.g. ecological speciation through local adaptation and extreme competition, without a  
12 geographical barrier)(Savolainen, Lascoux, & Merilä, 2013; Savolainen, Pyhäjärvi, & Knürr,  
13 2007). Thus, it can be hypothesised that generalist species are composed of a mosaic of the  
14 genetic and functional divergences of populations. Such divergence has been shown for the  
15 Panamazonian hyperdominant (ter Steege et al., 2013) tree model species *Eperua falcata*  
16 Aublet. (Fabaceae) through the hilltop-bottomland contrast, where functional trait  
17 differentiation (Brousseau, Bonal, Cigna, & Scotti, 2013a) and potentially adaptive genetic  
18 divergence has been found between individuals living in contrasting habitats (Audigeos,  
19 Brousseau, Traissac, Scotti-Saintagne, & Scotti, 2013; Brousseau, Foll, Scotti-Saintagne, &  
20 Scotti, 2015). However, generalist species are not necessarily the result of adaptive genetic  
21 divergences among populations, but could be based on phenotypic plasticity, defined here as  
22 the capacity of a given genotype to generate various phenotypes in response to environmental  
23 variations (Bradshaw, 1965). Indeed, phenotypic plasticity is assumed to be a leading process  
24 for species eco-evolutionary dynamics and species diversification (Hendry, 2016; Moczek et  
25 al., 2011; Nicotra et al., 2010; West-Eberhard, 2003).

26 Conversely to the bottomland-hilltop contrast, the effects of the FS-WS contrast on  
27 both genotypes and phenotypes of related generalist species remain mostly unknown. One of  
28 the few published examples, studying *Protium subserratum* Engl. (Bursaceae), found  
29 differentiations for genetic, and chemical traits associated to herbivory resistance between FS  
30 and WS, but for rather large geographic distances (Fine, Metz, et al., 2013; Fine, Zapata, et  
31 al., 2013). In the context of generalist species on the FS-WS contrast, three questions need to  
32 be addressed to improve our understanding of Neotropical tree eco-evolutionary dynamics: (i)  
33 are functional traits shaped by FS and WS? and if so, how? (ii) are the traits to which FS- and  
34 WS-specialised species converge respectively, the same at the intraspecific level? and (iii) by

1 which eco-evolutionary processes (e.g. genetic adaptation or phenotypic plasticity) are such  
2 potential divergences realised at the intraspecific level? Moreover, there are only a few  
3 functional studies on trees at the intraspecific level in the Amazon rainforest, which are  
4 particularly needed for hyperdominant overabundant species (ter Steege et al., 2013). Such  
5 studies are desirable since hyperdominant species exhibit disproportionately large  
6 intraspecific variability (ITV; Albert et al., 2010; Des Roches et al., 2018; Siefert et al., 2015;  
7 Valladares et al., 2014) and can play a disproportionate role in ecosystem functioning (Fauset  
8 et al., 2015). Moreover, incorporating such ITV for hyperdominant species can improve our  
9 understanding of forces structuring plant communities (Violle et al., 2012).

10 Finally, we propose an improvement of functional approaches to understand tree  
11 ecology, with a dynamic approach to better incorporate tree phenotypic variability (intra- or  
12 interspecific). In our point of view, functional approaches are most of the time “static”, since  
13 trait measurements are made at a particular age of the tree, representative of a tree’s  
14 functional traits at a specific moment of its life. A dynamic approach considers the  
15 development of the trunk for instance, described as a sequence of elementary repetitive units  
16 (e.g. internode, growth unit, annual shoot), universal for vascular plants, and the accumulation  
17 and fluctuation of growth, branching, and flowering processes through a tree’s lifespan, in  
18 reference to the tree’s architectural development (Chaubert-Pereira, Caraglio, Lavergne, &  
19 Guédon, 2009; Yann Guédon, Caraglio, Heuret, Lebarbier, & Meredieu, 2007; Taugourdeau  
20 et al., 2012).

21 Here, we want to bridge these caveats by taking advantage of the Amazon rainforest  
22 genus *Cecropia*, composed of hyperdominant pioneer trees critical in the recovery of Amazon  
23 forests. We focus on *Cecropia obtusa* Trécul (Urticaceae), a widespread Guiana shield  
24 generalist species, capable of growing on both FS and WS, and displaying perennial growth  
25 marks, which allow for retrospective analysis of tree architectural development (growth,  
26 branching, flowering) through time, making *C. obtusa* an ideal case study (Heuret,  
27 Barthélémy, Guédon, Coulmier, & Tancre, 2002; Taugourdeau et al., 2012; Zalamea,  
28 Stevenson, Madriñán, Aubert, & Heuret, 2008). We developed a functional ecology-based  
29 approach by coupling architectural development and growth trajectory analyses for two sites  
30 with both soil types in French Guiana. The ITV assessment according to the FS-WS variations  
31 are fitted in the perspective of the eco-evolutionary dynamics of *C. obtusa*, without *a priori*  
32 on genotype. We aim to answer the following questions:

33 (i) Do growth trajectories and architectural development patterns give us a more  
34 comprehensive understanding of soil effects on tree phenotype? As growth trajectories and

1 architectural development vary, we hypothesise capturing soil-related variation, leading to a  
2 more comprehensive understanding of overall phenotypic variation patterns.

3 (ii) Are the functional intraspecific patterns between FS and WS analogous to the  
4 interspecific functional patterns observed at the community level? As WS are poor soils  
5 determining particular functional traits at the interspecific level, we hypothesised to find an  
6 analogous functional divergence at the intraspecific level.

7 (iii) Finally, what is the phenotypic variance strategy of *C. obtusa* to cope as a soil  
8 generalist?

## 9 10 **MATERIALS AND METHODS**

11 *Study species: Why C. obtusa is an appropriate tree model species?*

12 *C. obtusa* has several characteristics that allow the retrospective construction of a  
13 tree's past growth. The growth of *C. obtusa* is continuous (no cessation of elongation) and  
14 monopodial (no death of meristem), the tree is made of a set of axes, where each one is  
15 composed of an ordered, linear, and repetitive succession of phytomers (i.e. the set of a node,  
16 an internode, a leaf, and its axillary buds; Fig. S1). Leaves are stipulated, with an enveloping  
17 stipule named calyptra which has a protective function (Fig. S1). At the leaf establishment,  
18 the calyptra sheds leaving a characteristic ring scar delimiting the associated internode, and  
19 usable as a permanent growth marker (Heuret et al., 2002). The 10-day stable phyllochron  
20 (i.e. rhythm of leaf production) associated with such permanent growth marker allows for the  
21 retrospective analysis of tree growth and development, covering the tree's lifespan (Heuret et  
22 al., 2002; Zalamea et al., 2012).

23 There are three lateral buds in the axil of each leaf (Fig. S1). The central bud is  
24 vegetative and potentially originates a new axis. The two others are proximal lateral buds of  
25 the vegetative central one and potentially originate inflorescences (i.e. borne inflorescences by  
26 an A1 axis are fundamentally of order 3). The inflorescences are thus arranged in pairs  
27 consisting of a common peduncle bearing spikes initially completely enclosed by a spathe.  
28 The inflorescences leave permanent scars after shedding, allowing the retrospective analysis  
29 of tree's lifespan flowering events. The same retrospective analysis is possible with branching  
30 events since the presence of past branches remains visible.

31  
32 *Study site*

33 Two sampling sites were selected in French Guiana: (1) Counami, along the Counami forestry  
34 road (N5.41430°, W53.17547°, geodesic system WGS84); and (2) Sparouine, along the

1 national road 5 (RN5) that connects the municipalities of St-Laurent-du-Maroni and Apatou  
2 near Sparouine Municipality (N5.27566°, W54.20048°). It is difficult to find locations with  
3 both FS and WS populated by *C. obtusa* stands, so we had to incorporate a potential site  
4 effect. The warm and wet tropical climate of French Guiana is highly seasonal due to the  
5 north-south movement of the Inter-Tropical Convergence Zone. Annual rainfall is 3,041 mm  
6 year<sup>-1</sup> and annual mean air temperature is 25.7 °C at Paracou experimental station (Gourlet-  
7 Fleury, Guehl, & Laroussine, 2004) situated nearly at 30 km and 150 km to the east of  
8 Counami and Sparouine sites respectively. There is one long dry season lasting from mid-  
9 August to mid-November, during which rainfall is < 100 mm month<sup>-1</sup>. The two studied sites  
10 (Counami and Sparouine) are characterised by rainfall differences (Fig. S2). Counami shows  
11 higher levels of rainfall and higher contrasts between the long rainy and the long dry seasons.  
12 For each of the two sites, two micro-localities are identified corresponding to two soil types:  
13 ferralitic soils (FS) and white-sand soils (WS). Local sites were chosen to be well drained and  
14 on upper slopes. Each micro-locality supports individuals of *C. obtusa*.

15

#### 16 *Plant material, study conception, and sampling*

17 Individuals have grown in clearings and form a secondary forest where they are the dominant  
18 species together with *C. sciadophylla*. A total of 70 trees were selected in September and  
19 December 2014 respectively for Counami and Sparouine sites: 32 in Counami and 38 in  
20 Sparouine. Soil samples were taken at the same time for pedological analysis. On the  
21 Counami site, where individuals are widely spaced, a soil sample was taken at the base of  
22 each individual tree. On the Sparouine site, where individuals were clustered, 9 soil samples  
23 were taken, as each soil sample was representative of 4-6 individuals located no further than  
24 30m from the soil sample spot. We acknowledge that the link between an individual and the  
25 associated soil sample remains approximate as root system of *C. obtusa* can colonise a zone  
26 of 15 m around the tree (Atger & Edelin, 1994).

27 As *C. obtusa* is dioecious, only pistillate trees were felled to avoid potential sex-  
28 related variability in the measured traits. Trees were not felled according to the same scheme  
29 in the two sites. Trees were preselected to have as close as possible comparable diameters at  
30 breast height (DBH), and age was estimated with binoculars according to the method  
31 described by Zalamea et al. (2012). By counting the number of internodes we were able to  
32 estimate the age of trees as each internode is produced in 10 days (Heuret et al., 2002;  
33 Zalamea et al., 2012). In Sparouine, all individuals correspond to a single colonisation pulse:  
34 all individuals have similar age (7-10 years), with DBH of 11.94 to 25.70 cm, and heights of



1 13.85 to 23.20 m (Fig. S3). Both soil types were represented by 19 individuals and all  
2 individuals were felled and measured between the 14<sup>th</sup> and the 19<sup>th</sup> of September 2015. Thus,  
3 season-, size-, and age-related effects on traits are controlled for soil and individual  
4 comparisons.

5 The experimental design at COUNAMI was different. The forestry road was opened  
6 gradually, and therefore the age of the trees differed according to the road section (Zalamea et  
7 al., 2012). All individuals assigned to WS at COUNAMI were selected at a single small WS  
8 patch located 6 km after the entrance of the road. Thus, trees also represented a single  
9 colonisation pulse and were of similar age (14-16 years), except one significantly older  
10 individual of 22.8 years old), with DBH from 6.21 to 15.18 cm, and heights from 10.27 to  
11 16.18 m, (Fig. S3). It was not possible to choose trees on FS on a single restricted area  
12 because of the perturbation of soil structure by the logging machines and because we  
13 excluded trees on down slopes. Consequently, FS trees were sampled between km 6 to 11 of  
14 the forestry road and included different cohorts with different ages (7-23 years), DBH of 9.55  
15 to 22.44 cm, and heights of 12.16 to 22.63 m (Fig. S3). Eleven and eighteen individuals were  
16 sampled on FS and WS respectively. COUNAMI trees were felled at different dates, from  
17 September 2014 to April 2016. The contrasted protocol was chosen to study seasonal and  
18 ontogenetic effect on leaf traits, but the results of such analysis will not be addressed here.

19

#### 20 *Soil properties*

21 Pedological analyses included granulometry, moisture content, acidity, organic matter  
22 contents, and contents of exchangeable cations (Appendix S1, with detailed abbreviations).  
23 The complete sampling procedure is described in the Appendix S1. Exchangeable cations  
24 were analysed divided by cation-exchange capacity (CEC) to avoid autocorrelations between  
25 the former and the latter. We also calculated a soil index of fertility as:  $Index_{soil} =$   
26  $\frac{K+Ca+Mg+Na}{CEC}$ .

27 The *a priori* classification of soil types (FS-versus-WS) was confirmed by pedological  
28 analyses of the soil properties within each site. The described pattern of soil properties is  
29 congruent with that reported in the literature (Adeney et al., 2016; Fine & Baraloto, 2016).  
30 WS consist of a large proportion of coarse sand with high Ca:CEC and C:N ratios. FS consist  
31 of a large proportion of clay and silt with high moisture, N, C, MO P<sub>tot</sub> contents and a high  
32 Al:CEC ratio. Based on water availability, N content, and Index<sub>soil</sub>, the site fertility can be  
33 ordered as COU-FS > SPA-FS > COU-WS = SPA-WS. Sparouine WS are characterised by

1 higher H:CEC and Fe:CEC ratio than Counami WS. The related results are presented in  
2 Appendix S1. Within sites, the difference between soil types is more contrasted in Counami  
3 than in Sparouine.

#### 4 5 *Architectural and functional traits*

6 For all individuals, we measured a suite of architectural traits at phytomer and whole-  
7 tree levels to characterise growth, branching and flowering dynamics and the resulting tree  
8 architecture. Retrospective analysis of development allows us to consider tree developmental  
9 trajectories as growth performance traits (i.e. the height-age relationship). Such dynamical  
10 approach considers the development of the trunk only (no branches) described as a sequence  
11 of phytomers. Three variables were measured for each phytomer: (1) internode length (2)  
12 vegetative bud state coded as: 0 not developed or aborted; 1 developed, present or pruned, (3)  
13 inflorescence bud state coded as: 0 no inflorescence; 1 pruned or present inflorescences.  
14 Features for bud states are treated as binary values: presence or absence. As suggested by  
15 Davis (1970), Heuret et al. (2002), and Zalamea et al. (2008), we analysed periodical  
16 fluctuations in internode length as well as the rhythmic disposition of inflorescences and  
17 branches to infer the past development of the tree and model its growth dynamic (section  
18 statistical analysis and Appendix S2). The measured and estimated traits presented as  
19 longitudinal sequences, associated with abbreviations, are shown in Table 1. Whole-tree  
20 dimensional traits complete the dynamic analysis to define the tree's ecological performance  
21 (Table 1, with detailed abbreviations)

22 Functional traits were measured especially at the leaf level (Table 2, with detailed  
23 abbreviations) indicative of leaf resource capture and defence against herbivores (Baraloto et  
24 al., 2010). Trunk wood specific gravity is indicative of stem transport, structure and defence  
25 against parasites (Baraloto et al., 2010). As *Cecropia* trees bear only few, but very large  
26 leaves, we measured leaf-level traits for only one leaf per individual: either the third or the  
27 fourth leaf positioned under the apex of the A1 axis. In this way, potential effects of plant  
28 spatial structure and phenology on variation of leaf-level traits are controlled. Leaf lifespan  
29 was derived on the postulate of a constant 10-day phyllochron (i.e. rhythm of leaf production)  
30 as shown by Heuret et al., (Heuret et al., 2002), by multiplying the number of leaves of the A1  
31 axis by 10 days (i.e. interval between the emergence of two successive leaves). The complete  
32 sampling procedure for functional traits is described in Appendix S3.

#### 33 34 *Statistical analyses*

1 Topology of trees and the different pedological, dimensional, and functional features  
2 associated with each repetitive unit are coded in sequences in Multi-scale Tree Graph format  
3 (MTG; Godin & Caraglio, 1998; Godin, Costes, & Caraglio, 1997).

4 Statistical analyses relative to developmental dynamics were conducted with  
5 AMAPmod (*op. cit.*), now integrated in the OpenAlea platform, re-engineered and named  
6 ‘VPlants’ (Pradal, Coste, Boudon, Fournier, & Godin, 2013), and the R programming  
7 language (R Core Team, 2018).

8 We relied on sample autocorrelation coefficients to point out a potential periodicity on  
9 the stand level (i.e. soil x site) for growth, branching, and flowering process. Thereafter, such  
10 stand periodicity would help to improve retrospective analysis of tree development with a  
11 temporal scale. The use of sample autocorrelation coefficients for all trees together allows  
12 measurement of the correlation between observations of sequences of quantitative variables  
13 separated by different distances. The autocorrelation function measures the correlation  
14 between  $X_t$  and  $X_{t+k}$  as a function of the internode lag  $k$ . The sample autocorrelation function  
15 is an even function of the internode lag and hence needs to be plotted for  $k = 0, 1, 2, \dots, n$ . We  
16 applied auto-correlation analysis to residual sequences obtained from internode length  
17 sequences after removing the ontogenetic trend, to binary branching, and flowering sequences  
18 (Y. Guédon, Barthélémy, Caraglio, & Costes, 2001; Y. Guédon, Heuret, & Costes, 2003).

19 To analyse fluctuations of internode length, we used classical methods of time series  
20 analysis relying on a decomposition principle. The different sources of variation, such as  
21 long-term changes in mean level and local fluctuations, are identified by the application of  
22 various types of filters that were initially analysed for individual trees (Yann Guédon et al.,  
23 2007). Firstly, we calculated a moving average to extract the trend of internode length  
24 sequences in a similar way as Zalamea et al. (2008). Having extracted the trend, we looked at  
25 local fluctuations by examining the residuals. Residuals were generated by dividing for each  
26 internode, its length by its moving average. Such standardization allowed us to give the same  
27 status to fluctuations of both small and large amplitudes, which is pertinent in old trees that  
28 have very short internodes at the apex of axes compared to the first nodes at the trunk base  
29 (Appendix S3 for details). Analysis of generated internode residuals allows the identification  
30 of the limits of the long dry season in September/October for successive years, since shorter  
31 internodes are elongated during this period as demonstrated in (Davis, 1970), for *C.*  
32 *obtusifolia* Bertol. and *C. peltata* L., and (Zalamea et al., 2013), for *C. sciadophylla* Mart..  
33 Year delineation for each individual allows estimation of a mean phyllochron for each year  
34 according to the node rank (Appendix S3). Knowing the phyllochron allows conversion of the

1 rank node to a temporal scale. Finally, a higher organizational level can be interpolated at the  
2 year scale considering the length or the number of nodes elongated between two successive  
3 dry seasons (Table 1). Although the growth is continuous (Zalamea et al., 2013), we use the  
4 term “annual shoot” (AS; Table 1) in the text to refer to the growth between two successive  
5 dry seasons.

6 Based on cumulated tree height according to age, two linear growth phases were  
7 identifiable, with a slope rupture nearly at the age of 6-7 for all trees. As the first phase was  
8 fully described for all individual trees, and all trees were older than 7 years old, we calculated  
9 quantitative growth rates ( $m^{-1}$ ) for each tree as the slope of the linear regression of the  
10 relationship between the cumulated tree height and tree age, for the first seven years only.

11 Existence of clusters defined by signatures of developmental trajectories are  
12 characterised with a clustering method on the generated longitudinal data (Table 1), with the  
13 *kml* R package (Genolini & Falissard, 2009). It is a classification method based on an  
14 implementation of “k-means”, itself based on a minimization function of distances. As for  
15 classical k-means, KML deals with the choice of a distance, cautions against local maxima,  
16 and the criterion of partition choice (*op. cit*). For each trait, 100 simulations are used, and  
17 decisions are based on the Calinski-Harabasz criterion. The dependency of defined clusters on  
18 soil types is evaluated with a Pearson’s chi-squared test.

19 Analyses relative to pedological, dimensional, and functional data are realised in R  
20 language. Principal Component Analysis (PCA) were conducted with the *ade4* (Chessel,  
21 Dufour, & Thioulouse, 2004) and *Factoextra* (Kassambara & Mundt, 2016) R packages. A  
22 comparison of factorial coordinates of individuals was conducted for each axis based on a  
23 nested-ANOVA and a *post-hoc* Tukey’s HSD test. Comparisons of means between the four  
24 conditions (soil types x sites) for soil properties, functional traits, and growth rates were  
25 conducted with a nested-ANOVA and a *post-hoc* Tukey’s HSD test. For a proper soil  
26 comparison, season and ontogeny-related effects on leaf trait variation for Counami trees were  
27 tested with a multiple regression analysis. No season-related effects were detected based on a  
28 total of 70 leaves. Only ontogeny-related effects were filtered for each trait when a signal was  
29 detected based on a linear regression analysis.

30

## 31 **RESULTS**

### 32 *Dynamic approach: architectural development and growth trajectory*

33 Autocorrelation functions calculated for the internode length residues as well as branching  
34 and flowering binary sequences all showed significant periodicity regardless of the site or soil

1 type (Fig. 1). In Counami, the correlogram calculated for internode residues sequences  
2 yielded significant positive maxima at lags 30, 58, 88 in WS and 30, 52, 64, 88 in FS (Fig.  
3 1a). In Sparouine, a similar pattern was observed with significant positive maxima at lags 17,  
4 34, 79 in WS and 19, 36, 68, 88 in FS (Fig. 1b). Similar overall patterns are observed for  
5 flowering event sequences. In Counami, the correlogram yielded significant positive maxima  
6 at lags 12, 27, 52, 77, 88 in WS and 27, 53, 73, 89 in FS (Fig. 1c). In Sparouine, significant  
7 positive maxima were at lags 16, 32, 63, 74 in WS and 19, 33, 48, 64, 89 in FS (Fig. 1d).  
8 Considering the first 50 lags, a bimodal pattern (lags 12-19 and 27-36) is more pronounced in  
9 Sparouine and on WS for internode length and flowering variables. In Counami, the  
10 correlogram calculated for branching event sequences yielded significant positive maxima at  
11 lags 38, 60 in WS and 29, 60, 88 in FS (Fig. 1e). In Sparouine, the correlogram calculated for  
12 this variable yielded significant positive maxima at lags 30, 40, 70 in WS and 28, 38, 100 in  
13 FS (Fig. 1f).

14 Based on rhythms relying on autocorrelation coefficients and the knowledge on *C.*  
15 *obtusa* (Heuret et al., 2002) and *C. sciadophylla* (Zalamea et al., 2008), we delineated years,  
16 trying to respect the following rules: 30-35 trunk nodes per year, 1 to 2 trunk flowering events  
17 per year, and 0 or 1 trunk branching event (i.e. tiers of branches) per year. Based on such  
18 diagnosis, we calculated the date of the formation of each node and switched from a  
19 topological scale, the rank of the node, to a temporal scale (Appendix S5). Phyllochron  
20 according to node rank showed the same trend in both sites (Fig. 2). It initially decreased to  
21 the 100th node rank and then linearly and continually increased for both sites (Fig. 2a, b). For  
22 both sites, there were no significant difference between FS and WS based on confidence  
23 intervals (Fig. 2).

24 The variation of trunk internode length according to age showed a hump-like trend for  
25 both sites (Fig. 3a, c), with an initial increase to the 8-9<sup>th</sup> year preceding a decrease and a  
26 plateau phase. In Counami, FS trees had significant longer internodes than WS ones the first 5  
27 years, based on confidence intervals (Fig. 3a). In Sparouine, there were no significant  
28 difference between FS and WS mean trajectories based on confidence intervals. The cluster  
29 analysis defined two clusters for both sites (Fig. 3b, d). The clusters significantly matched the  
30 soil types in Counami ( $P = 0.003$ ) but not in Sparouine ( $P = 0.328$ ).

31 For both sites, the number of nodes per AS initially increased over the first 3-5 years  
32 and then continually decreased (Fig. 3e, g). There were no significant differences between FS  
33 and WS based on confidence intervals. The cluster analysis defined two clusters for both sites

1 (Fig. 3f, h). In Counami the two clusters were not related to soil type ( $P = 0.401$ ), whereas in  
2 Sparouine the clusters were significantly associated with soil-type ( $P = 0.008$ ).

3 For both site, the variation of AS length followed the same trend as the internode level  
4 (Fig. 3a, c, i, k). AS length initially increased over the 3 first years and then decreased, except  
5 for WS Counami trees where AS length decreased from the first year. There was a significant  
6 difference in AS length between Counami FS and WS for trees between 2 and 4 years old.  
7 There was no significant difference between Sparouine FS and WS based on confidence  
8 intervals. The cluster analysis defined for both sites two clusters (Fig. 3j, l). At Counami they  
9 were related to soil types ( $P = 0.003$ ), while they were not in Sparouine ( $P = 0.283$ ).

10 For both sites, there was a pattern for FS trees to be higher than WS trees for a given  
11 age (Fig. 3m, o). Within the Counami site, FS trees covered the largest range of trajectories  
12 and reached the highest height (Fig. 3m). Within the Sparouine site, WS trees covered a larger  
13 range of trajectories and the WS highest trees were as tall as the highest FS ones (Fig. 3o). For  
14 both sites, it was possible to identify two main growing phases. The phases were  
15 differentiated by variations in growth rates over the tree's lifespan. The first phase covered the  
16 first 5-7 years, except for FS Counami trees where it was the first 9-10 years. The second  
17 growing phase was defined by a slower growth rate, which remained constant for all  
18 individuals. The cluster analysis defined three clusters for both sites, which were significantly  
19 associated to soil types ( $P < 0.01$ ; Fig. 3n, p). For Counami, the cluster C was composed of FS  
20 trees with the highest growth rates whereas in Sparouine, cluster C was composed of WS trees  
21 with the slowest growth rates.

22 The analysis of the cumulated number of pairs of inflorescences on the trunk indicated  
23 that there was no significant difference between FS and WS for both sites based on  
24 confidence intervals (Fig. 4a, b). In Counami trees, there was a significant difference in the  
25 cumulated number of branches of the trunk between FS and WS after 5-6 years old based on  
26 confidence intervals (Fig. 4c). In Sparouine trees there was no significant difference in the  
27 cumulated number of branches on the trunk between FS and WS based on confidence  
28 intervals (Fig. 4d).

29 The height growth rate, calculated for the first seven years of growth, was significantly  
30 different between FS and WS on both sites ( $P < 0.001$ ; ANOVA; Fig. 5), with highest growth  
31 rates always exhibited by FS trees.

32 When comparing all four conditions in term of performance traits at whole tree level,  
33 significant differences were identified for tree height, DBH, the branching order, the height of  
34 the first flowering and first branching, and the node rank for first branching (Table 3;  $P <$

1 0.05; ANOVA). No significant differences appeared for any trait within Sparouine between  
2 FS and WS trees ( $P > 0.05$ ; ANOVA). Significant differences between FS and WS trees  
3 within Counami were found for tree height, the branching order, the height of first flowering,  
4 and the node rank of first branching ( $P < 0.05$ ; ANOVA). Between-site differences were  
5 found for DBH and the height of first flowering ( $P < 0.05$ ; ANOVA).

### 6 7 *Characterization of functional traits*

8 The first and second axes of the multivariate analysis of correlations for functional traits  
9 explained 47.0 % of the inertia (Fig. 6a). The first axis (28.5 %) clustered individuals for  
10  $C:N_{\text{leaf}}$ ,  $L_{\text{pet}}$ ,  $A_{\text{pet}}$ ,  $A_{\text{leaf}}$  and  $N_{\text{leaf}}$ . The second axis (18.5 %) clustered individuals for  $H_2O_{\text{res,leaf}}$ ,  
11 and  $K_{\text{leaf}}$ . Conditions (soil types x sites) were differentiated along the first axis (Fig. 6b;  $P <$   
12  $0.05$ ; ANOVA) with significant differences (i) between FS and WS within Counami and (ii)  
13 between Counami and Sparouine when only considering FS. Conditions were more strongly  
14 differentiated along the first axis ( $P < 0.001$ ; ANOVA) with Counami trees in WS differing  
15 from Sparouine trees in both FS and WS. When comparing soil types and sites for each trait  
16 separately, significant average heterogeneity appeared only for  $L_{\text{pet}}$  and  $A_{\text{leaf}}$  (Table 4). Trees  
17 on FS had longer petioles ( $L_{\text{pet}}$ ) and larger leaves ( $A_{\text{leaf}}$ ) than those on WS in Counami but not  
18 in Sparouine ( $P < 0.05$ ; Tukey's test).

## 19 20 **DISCUSSION**

21 To our knowledge, our study is the first that compares both tree architectural development and  
22 functional traits (i.e. measured leaf and trunk traits) for a generalist tree species able to  
23 colonise starkly contrasting soil types: FS and WS. Our pedological analysis clearly  
24 demonstrates strong contrasts in soil characteristics between FS and WS, opening the  
25 possibility of soil-related phenotypic variance. Contrary to our proposed hypothesis, the  
26 functional variance between FS and WS is low and does not mirror the interspecific variance  
27 in functional composition. Nevertheless, significant soil-related phenotypic variance is mainly  
28 mediated by the architectural development entailing carbon saving. These points are discussed  
29 below.

### 30 31 *Variance in *C. obtusa* architectural development between soil types*

32 The autocorrelation function for all trees together confirms a high degree of periodicity across  
33 all individuals for growth, flowering, and branching processes. For growth, the period is a  
34 multiple of 15-18 internodes, consistent with a bi- or an annual periodicity and the production

1 of nearly 30-35 nodes per year associated with an approximately-10-day phyllochron, as  
2 previously shown (Heuret et al., 2002; Zalamea et al., 2012). Such strong pattern of  
3 periodicity strengthened and justified the year delineation method.

4 The effect of soil types on the ontogenetic component of growth is dependent on the  
5 trait considered. Here, there is no significant effect of soil types on growth rhythm traits such  
6 as phyllochron and the number of nodes per AS. Similarly, Zalamea et al. (2013) found no  
7 difference in phyllochron between *C. sciadophylla* from two distanced locations with  
8 contrasting rainfall and our results indicates that phyllochron and leaf production are not  
9 prone to vary with environment. Soil type shows a significant effect on both internode length  
10 and AS length in Counami for the first 6 years, but not in Sparouine. When the soil effect is  
11 strong enough, the differences in AS length between soil types correspond mainly to  
12 variations in internode length rather than variations in number of nodes per AS. Reducing the  
13 number of nodes per AS would imply the increase of the phyllochron, thus reducing the  
14 number of leaves produced per year. Such mechanism would critically affect tree carbon  
15 balance and probably is avoided as the contribution of a given leaf to the carbon balance is  
16 disproportionate in comparison to most of species: *C. obtusa*'s leaves are large (1,000-5,000  
17 mm<sup>2</sup>, Levionnois *et al.*, *data not published*) but few (100-600 leaves on one tree, Table 3).  
18 Soil type has significant effects on tree cumulated height at age, mirroring the lifespan  
19 cumulated effect of soil type on internode length. Such pattern is less noticeable on Sparouine  
20 trees, where there were fewer significant contrasts in height between FS and WS (Appendix  
21 S2 and Fig. S4).

22 WS trees in Counami had significantly less cumulated branches, and lower branching  
23 order, than those in FS. WS trees in Counami have, therefore, reduced space and light  
24 foraging capacities, probably hindering their competitive abilities. Even if WS trees may have  
25 reduced space foraging capacities compared to FS trees, maybe the space and light  
26 competition between individuals in WS is also reduced, since tree species diversity and stem  
27 density are lower on WS (Fine & Baraloto, 2016). Or on the contrary, it could posit that as  
28 WS are water and nutrient limiting, intra- and interspecific competition becomes more severe.  
29 Because flowering is synchronous on all crown axes (Heuret et al., 2003), the production of  
30 inflorescences and seeds is exponentially related to the number of our measured main  
31 branches. Therefore, WS trees in Counami must also have comparatively reduced  
32 reproductive and dispersive abilities, leading to a reduced overall fitness compared to their FS  
33 conspecifics under the assumption that FS and WS trees form a unique population. The  
34 population genetic structure of *C. obtusa* in French Guiana, and whether individuals found in



1 FS and WS belong to single populations, is still unknown. Such information is essential to  
2 interpret the eco-evolutionary implications of reduced seed output of WS trees.

3 WS imposed strong and significant limitations on growth trajectories. Nonetheless,  
4 trees in Counami FS have access to the richest soils based on water, clay and N contents, and  
5 the  $\text{Index}_{\text{soil}}$  (Appendix S2 and Fig. S4), whereas the highest growth trajectories are observed  
6 in Sparouine FS. Such incongruence could be explained by other factors, such as: (i) variance  
7 in *C. obtusa* genetic local adaptations; (ii) cloud-shading variability (Wagner, Rossi, Stahl,  
8 Bonal, & Hérault, 2012) between sites; (iii) intra- or interspecific competition, as stand  
9 structures are different between sites in terms of tree density, and proportion and composition  
10 of other tree species; and finally, (iv) the slightly larger rainfall during the dry season for the  
11 Sparouine site (Fig. S2). Clay and silt, which drive water reserves, do not differ between sites  
12 for a given soil type (Appendix S2 and Fig. S4), so under the fourth hypothesis, water  
13 availability would be the leading constraining factor explaining growth differences across  
14 sites, with an accruing sensitivity during the dry season for Counami trees (Wagner et al.,  
15 2012).

16 Our results are consistent with those of previous studies (Charles-Dominique, Edelin,  
17 & Bouchard, 2009; Charles-Dominique, Edelin, Brisson, & Bouchard, 2012; Nicolini,  
18 Barthélémy, & Heuret, 2000; Stecconi, Puntieri, & Barthélémy, 2010; Taugourdeau et al.,  
19 2012; Taugourdeau, Chaubert-Pereira, Sabatier, & Guédon, 2011), where limiting or stressful  
20 conditions are associated with smaller geometric features (e.g. length, diameter...) or slower  
21 growth rates (Coomes & Grubb, 1998). But the precise soil physico-chemical determinants  
22 that explain intra- and inter-site differences in trees developmental trajectories remain difficult  
23 to understand and have to be investigated.

24

### 25 *Variance in C. obtusa functional traits between soil types*

26 Contrasting soil properties, such as FS-*versus*-WS, have strong impacts on species  
27 community structure in the Amazon rainforest, both at local and regional scales (Daly et al.,  
28 2016; Fine & Baraloto, 2016; Stropp et al., 2011; ter Steege et al., 2013). At the community  
29 level, WS flora is characterised by a convergence in functional strategies, particularly towards  
30 a conservative nutrient use strategy (Fine & Baraloto, 2016; Fine et al., 2010; Fortunel et al.,  
31 2012; Fortunel, Paine, et al., 2014; Fortunel, Ruelle, et al., 2014; Fyllas et al., 2009; Grubb &  
32 Coomes, 1997; Patiño et al., 2009). These imply high LMA, high WSG, small seeds, and low  
33 leaf nutrient contents associated with high water use efficiency for WS tree species (Fine &  
34 Baraloto, 2016), on the contrary of FS tree species. Such well-defined trait optima according

1 to species soil-specialization lead to the assumptions that (i) the phenotype range that trees are  
2 capable of expressing to match the environment they live in is bounded, and that (ii) such  
3 boundaries would shape functional ITV for species colonizing both FS and WS. To our  
4 knowledge, no study has focused on the effect of FS-vs-WS soil properties on the  
5 intraspecific functional variability.

6 Contrary to our hypothesis, a striking result is that the soil was not a strong enough  
7 driver across the area we spanned to make any measured *C. obtusa* trait responsive to soil  
8 composition variance. Only two functional traits are differentiated between soil types and  
9 only for the Counami site: petiole length and leaf area. Even this weak response does not  
10 mirror the interspecific functional level composition, where rather high LMA, high WSG, and  
11 low leaf nutrient contents are generally found (Fine & Baraloto, 2016). The higher  
12 pedological contrasts between FS and WS at Counami is probably the reason why it is the  
13 only site where we found significant differences in leaf traits (Appendix S2 and Fig. S4). One  
14 explanation is that larger leaves are associated with larger vessels (Gleason et al., n.d.), and  
15 thus potentially larger water supplies. Moreover, larger leaves are self-sufficient for  
16 generating higher evaporative demand and thus higher tension and driving force (Whitehead,  
17 Edwards, & Jarvis, 1984). Limiting water demand with smaller leaves could be an efficient  
18 way to prevent drought-related embolism, especially in a water-limited environment as WS.

19 Such findings of low functional responses are in contrasts with intraspecific variance  
20 associated to maternal habitats in most functional traits in *Eperua* juveniles (Brousseau et al.,  
21 2013a). However, the patterns of genetic structure and the occurrence of highly divergent  
22 alleles among bottomland and hilltop *Eperua*, suggest that individuals could be locally  
23 adapted to micro-habitats which explains the habitat-dependent variance in functional traits  
24 (Audigeos et al., 2013; Brousseau et al., 2013a, 2015). Such habitat-genome associations have  
25 not yet been tested in *C. obtusa*. These findings of low trait response are also in contrast with  
26 the results of (Fine, Metz, et al., 2013) which found differences in leaf chlorophyll content  
27 and leaf defence chemical traits against herbivores for *Protium subserratum* between FS and  
28 WS. However and contrary to our Counami site where we found the higher trait contrast, the  
29 *P. subserratum* FS and WS ecotypes in (Fine, Metz, et al., 2013) were from different  
30 locations tens to hundreds of kilometres apart, potentially introducing other distance-related  
31 effects such as population genetic structure.

32 The pedological analysis indicated that water availability and N content were limited  
33 on WS (Appendix S2 and Fig. S4). Therefore, the development of *Cecropia* trees on WS is  
34 allowed by two unexclusive explanations in our point of view. First, there are relevant

1 functional traits we did not consider in this study. It has been shown that water availability is  
2 the leading climate driver of Amazonian rainforest tree growth (Wagner et al., 2012), thus  
3 hydraulic architecture and drought-resistance traits, such as drought-induced vulnerability to  
4 cavitation, stomatal sensitivity, leaf turgor loss point, root depth, crown area to sapwood area  
5 ratio, may have played a central role in ensuring growth and survival on the different soil  
6 types (Adams et al., 2017; Anderegg et al., 2016; Eller et al., 2018; Urli et al., 2013). Greater  
7 hydric stress is expected on WS, but  $\delta^{13}\text{C}_{\text{leaf}}$ , which is a proxy for plant water-use efficiency,  
8 did not vary with soil types. One explanation would be that water-use efficiency starts to  
9 change when trees are effectively water-stressed, i.e. at the end of the dry season (November  
10 in French Guiana, Fig. S2), when soil water content is exhausted (Bonal, Barigah, Granier, &  
11 Guehl, 2007; Wagner, Hérault, Stahl, Bonal, & Rossi, 2011). Since most of our trees were not  
12 sampled at this time, we can hypothesised that they were not stressed enough for detecting  
13 contrasting  $\delta^{13}\text{C}_{\text{leaf}}$ . The variance in soil characteristics can also impact the root system  
14 properties (Freschet et al., 2017), including mycorrhizal fungi associations (Roy et al., 2016).  
15 Such processes were not captured by the functional traits analysis.

16

### 17 *The phenotypic variance strategy for being a soil generalist*

18 We showed that soil heterogeneity across sites does not affect the functional traits of *C.*  
19 *obtusata* we selected, but rather drives a divergence on growth trajectory and total biomass  
20 between FS and WS. Indeed, we showed that WS trees exhibit shorter internodes and annual  
21 shoots for a given age, and lower height and DBH, leading to lower aboveground biomass for  
22 a given age. Also in terms of biomass, we showed that Counami WS trees have less  
23 cumulated branches over their lifespan, which entails exponential carbon savings by reducing  
24 the number of total leaves as also the quantity of flowers and fruits, if everything else remains  
25 equal (flower and fruit size, number of flowering and fruiting events in a year). We also  
26 identified that Counami WS trees bear petioles ~27% shorter than their FS conspecifics,  
27 which lead to substantial carbon savings per phytomer. Minimizing carbon expenses in  
28 resource-limiting environments is consistent with the growth strategy of heliophile species  
29 facing strong competition for light, where they prioritise growth in height (Poorter, Bongers,  
30 & Bongers, 2006; Poorter & Rozendaal, 2008; Westoby, Daniel S. Falster, Angela T. Moles,  
31 Peter A. Vesk, & Wright, 2002).

32 Across soil types and sites, growth and survival on WS is optimised by buffering leaf  
33 and wood traits values, at least for the traits we measured, but by saving carbon through  
34 smaller internode, less branches, and lower wood increments; rather than just adjusting

1 functional traits as generally and implicitly posited or awaited (Brousseau, Bonal, Cigna, &  
2 Scotti, 2013b; Fine & Baraloto, 2016). One striking result strengthening this idea is the  
3 gradient of overall phenotypic response with soil contrasts. Indeed, we clearly showed, based  
4 on soil analysis, that soil differences were more contrasted in Counami than Sparouine. In the  
5 same way, no functional trait difference was found in Sparouine between FS and WS,  
6 whereas two traits were different in Counami between FS and WS. Moreover, our  
7 architectural analysis demonstrated higher contrast for Counami trees between FS and WS,  
8 based on cumulated height with age, internode length, annual shoot length, and cumulated  
9 branching.

10

## 11 **CONCLUSION**

12 Our study provides to our knowledge the first evaluation of FS-*versus*-WS soil effects on the  
13 phenotypic variability at the intraspecific level. Our findings point to the improvement made  
14 by integrating together functional traits, and whole-tree growth trajectory and architectural  
15 development, to detect the leading phenotypic adjustments involved at the intraspecific  
16 response to different soil types Functional traits divergence did not necessary occur at the  
17 intraspecific level in the same pattern as documented at the interspecific level. The main  
18 phenotypic differences between FS and WS trees were (i) height growth rates and trees  
19 heights at age –through the variation of internode length instead of phyllochron-, and (ii)  
20 branching when integrated on the tree’s lifespan. A better description of the soil-dependent  
21 phenotypic adjustments between FS and WS trees could be achieved by including mechanistic  
22 and physiological traits such as anatomical, photosynthetic, and hydraulic traits, and should be  
23 incorporated into future work. Our study provides a key insight into *C. obtusa*’s phenotypic  
24 variance associated with intraspecific soil heterogeneity, and future lines of research should  
25 address (i) the impact of phenotypic variability between FS and WS trees on the eco-  
26 evolutionary dynamics of the widespread species *C. obtusa*, as a model generalist tree species,  
27 (ii) the evolutionary process involved in the tolerance of environmental variation - phenotypic  
28 plasticity and/or genetic adaptation -, and thus (iii) whether there are neutral and adaptive  
29 genetic differences between individual *C. obtusa* established in FS and WS. Future prospects  
30 on phenotype-genotype-environment relationships are thus desirable in this way, especially  
31 for the hyperdominant tree species *C.obtusa* playing a key role in natural reforestation after  
32 disturbance in the Guiana shield and facing climate change.

33

## 34 **ACKNOWLEDGEMENTS**

1 We especially thank Jean-Yves Goret and Saint-Omer Cazal for their major contributions in  
2 field work and collecting data. We thank Julie Bossu, Coffi Belmys Cakpo, Jocelyn Cazal,  
3 Aurélie Cuvelier, Bruno Clair, Aurélie Dourdain, Alexandre Haslé de Barral, Solène Happert,  
4 Marie Hartwig, Clément Jouaux, Yohann Legraverant, Anabelle Mercrette, Ariane Mirabel,  
5 Audin Patient, Pascal Petronelli, Laurent Risser, Dylan Taxile, Camille Ziegler and Lore  
6 Verryckt for their assistance with field work and measurement of leaf traits. We gratefully  
7 thank Isabelle Maréchaux for critical and valuable comments on the manuscript. We thank  
8 Anna Deasey for English proof reading. We thank the ONF for access to forestry roads and  
9 the sampling. We also thank the USRAVE (INRA-COFRAC) of Bordeaux and the EEF lab  
10 (INRA) of Nancy for measurements of leaf nutrients. S.L. was supported by a doctoral  
11 fellowship from CEBA. This study benefited from an *Investissement d’Avenir* grant managed  
12 by the *Agence Nationale de la Recherche* (CEBA, ref. ANR-10-LABX-0025).

13

#### 14 **LITERATURE CITED**

- 15 Adams, H. D., Zeppel, M. J. B., Anderegg, W. R. L., Hartmann, H., Landhäusser, S. M.,  
16 Tissue, D. T., ... McDowell, N. G. (2017). A multi-species synthesis of physiological  
17 mechanisms in drought-induced tree mortality. *Nature Ecology and Evolution*,  
18 (10.1038/s41559-017-0248-x). Retrieved from [https://doi.org/10.1038/s41559-017-](https://doi.org/10.1038/s41559-017-0248-x)  
19 0248-x
- 20 Adeney, J. M., Christensen, N. L., Vicentini, A., & Cohn-Haft, M. (2016). White-sand  
21 Ecosystems in Amazonia. *Biotropica*, 48(1), 7–23. doi:10.1111/btp.12293
- 22 Albert, C., Thuiller, W., Yoccoz, G., Douzet, R., Aubert, S., & Lavorel, S. (2010). A  
23 multi-trait approach reveals the structure and the relative importance of intra- vs.  
24 interspecific variability in plant traits. *Functional Ecology*, 24(6), 1192–1201.  
25 doi:10.1111/j.1365-2435.2010.01727.x
- 26 Allié, E., Péliissier, R., Engel, J., Petronelli, P., Freycon, V., Deblauwe, V., ... Baraloto, C.  
27 (2015). Pervasive Local-Scale Tree-Soil Habitat Association in a Tropical Forest  
28 Community. *PLOS ONE*, 10(11), e0141488. doi:10.1371/journal.pone.0141488
- 29 Anderegg, W. R. L., Klein, T., Bartlett, M., Sack, L., Pellegrini, A. F. A., Choat, B., &  
30 Jansen, S. (2016). Meta-analysis reveals that hydraulic traits explain cross-species  
31 patterns of drought-induced tree mortality across the globe. *Proceedings of the*  
32 *National Academy of Sciences of the United States of America*, 113(18), 5024–5029.  
33 doi:10.1073/pnas.1525678113
- 34 Atger, C., & Edelin, C. (1994). Premières données sur l’architecture comparée des systèmes  
35 racinaires et caulinaires. *Canadian Journal of Botany*, 72(7), 963–975.  
36 doi:10.1139/b94-122

- 1 Audigeos, D., Brousseau, L., Traissac, S., Scotti-Saintagne, C., & Scotti, I. (2013). Molecular  
2 divergence in tropical tree populations occupying environmental mosaics. *Journal of*  
3 *Evolutionary Biology*, 26(3), 529–544. doi:10.1111/jeb.12069
- 4 Baraloto, C., Morneau, F., Bonal, D., Blanc, L., & Ferry, B. (2007). Seasonal water stress  
5 tolerance and habitat associations within four neotropical tree genera. *Ecology*, 88(2),  
6 478–489. doi:10.1890/0012-9658(2007)88[478:SWSTAH]2.0.CO;2
- 7 Baraloto, C., Timothy Paine, C. E., Poorter, L., Beauchene, J., Bonal, D., Domenach, A.-M.,  
8 ... Chave, J. (2010). Decoupled leaf and stem economics in rain forest trees. *Ecology*  
9 *Letters*, 13(11), 1338–1347. doi:10.1111/j.1461-0248.2010.01517.x
- 10 Bonal, D., Barigah, T. S., Granier, A., & Guehl, J. M. (2007). Late-stage canopy tree species  
11 with extremely low  $\delta^{13}\text{C}$  and high stomatal sensitivity to seasonal soil drought in the  
12 tropical rainforest of French Guiana. *Plant, Cell & Environment*, 23(5), 445–459.  
13 doi:10.1046/j.1365-3040.2000.00556.x
- 14 Bradshaw, A. D. (1965). Evolutionary Significance of Phenotypic Plasticity in Plants. In E.  
15 W. Caspari & J. M. Thoday (Eds.), *Advances in Genetics* (Vol. 13, pp. 115–155).  
16 Academic Press. doi:10.1016/S0065-2660(08)60048-6
- 17 Brodribb, T. (2017). Progressing from ‘functional’ to mechanistic traits. *New Phytologist*,  
18 215(1), 9–11. doi:10.1111/nph.14620
- 19 Brousseau, L., Bonal, D., Cigna, J., & Scotti, I. (2013a). Highly local environmental  
20 variability promotes intrapopulation divergence of quantitative traits: an example from  
21 tropical rain forest trees. *Annals of Botany*, 112(6), 1169–1179.  
22 doi:10.1093/aob/mct176
- 23 Brousseau, L., Bonal, D., Cigna, J., & Scotti, I. (2013b). Highly local environmental  
24 variability promotes intrapopulation divergence of quantitative traits: an example from  
25 tropical rain forest trees. *Annals of Botany*, 112(6), 1169–1179.  
26 doi:10.1093/aob/mct176
- 27 Brousseau, L., Foll, M., Scotti-Saintagne, C., & Scotti, I. (2015). Neutral and Adaptive  
28 Drivers of Microgeographic Genetic Divergence within Continuous Populations: The  
29 Case of the Neotropical Tree *Eperua falcata* (Aubl.). *PLOS ONE*, 10(3), e0121394.  
30 doi:10.1371/journal.pone.0121394
- 31 Charles-Dominique, T., Edelin, C., & Bouchard, A. (2009). Architectural strategies of *Cornus*  
32 *sericea*, a native but invasive shrub of Southern Quebec, Canada, under an open or a  
33 closed canopy. *Annals of Botany*, mcp273. doi:10.1093/aob/mcp273
- 34 Charles-Dominique, T., Edelin, C., Brisson, J., & Bouchard, A. (2012). Architectural  
35 strategies of *Rhamnus cathartica* (Rhamnaceae) in relation to canopy openness.  
36 *Botany*, 90(10), 976–989. doi:10.1139/b2012-069
- 37 Chaubert-Pereira, F., Caraglio, Y., Lavergne, C., & Guédon, Y. (2009). Identifying  
38 ontogenetic, environmental and individual components of forest tree growth. *Annals of*  
39 *Botany*, 104(5), 883–896. doi:10.1093/aob/mcp189

- 1 Chessel, D., Dufour, A.-B., & Thioulouse, J. (2004). The ade4 package - I: One-table  
2 methods. *R News*, 4, 5–10.
- 3 Clark, D. B., Palmer, M. W., & Clark, D. A. (1999). Edaphic Factors and the Landscape-Scale  
4 Distributions of Tropical Rain Forest Trees. *Ecology*, 80(8), 2662–2675.  
5 doi:10.1890/0012-9658(1999)080[2662:EFATLS]2.0.CO;2
- 6 Coomes, D. A., & Grubb, P. J. (1998). Responses of Juvenile Trees to Above- and  
7 Belowground Competition in Nutrient-Starved Amazonian Rain Forest. *Ecology*,  
8 79(3), 768–782. doi:10.1890/0012-9658(1998)079[0768:ROJTTA]2.0.CO;2
- 9 Cosme, L. H. M., Schiatti, J., Costa, F. R. C., & Oliveira, R. S. (2017). The importance of  
10 hydraulic architecture to the distribution patterns of trees in a central Amazonian  
11 forest. *New Phytologist*, 215(1), 113–125. doi:10.1111/nph.14508
- 12 Daly, D. C., Silveira, M., Medeiros, H., Castro, W., & Obermüller, F. A. (2016). The White-  
13 sand Vegetation of Acre, Brazil. *Biotropica*, 48(1), 81–89. doi:10.1111/btp.12307
- 14 Davis, R. B. (1970). Seasonal differences in intermodal lengths in *Cecropia* trees; a suggested  
15 method for measurement of past growth in height. *Turrialba*. Retrieved from  
16 <http://agris.fao.org/agris-search/search.do?recordID=US201301189116>
- 17 Des Roches, S., Post, D. M., Turley, N. E., Bailey, J. K., Hendry, A. P., Kinnison, M. T., ...  
18 Palkovacs, E. P. (2018). The ecological importance of intraspecific variation. *Nature*  
19 *Ecology & Evolution*, 2(1), 57–64. doi:10.1038/s41559-017-0402-5
- 20 Eller, C., de V. Barros, F., R.L. Bittencourt, P., Rowland, L., Mencuccini, M., & S. Oliveira,  
21 R. (2018). Xylem hydraulic safety and construction costs determine tropical tree  
22 growth. *Plant, Cell & Environment*, n/a-n/a. doi:10.1111/pce.13106
- 23 Engelbrecht, B. M. J., Comita, L. S., Condit, R., Kursar, T. A., Tyree, M. T., Turner, B. L., &  
24 Hubbell, S. P. (2007). Drought sensitivity shapes species distribution patterns in  
25 tropical forests. *Nature*, 447(7140), 80–82. doi:10.1038/nature05747
- 26 Fauset, S., Johnson, M. O., Gloor, M., Baker, T. R., M, A. M., Brienen, R. J. W., ... Phillips,  
27 O. L. (2015). Hyperdominance in Amazonian forest carbon cycling. *Nature*  
28 *Communications*, 6, 6857. doi:10.1038/ncomms7857
- 29 Ferry, B., Morneau, F., Bontemps, J.-D., Blanc, L., & Freycon, V. (2010). Higher treefall  
30 rates on slopes and waterlogged soils result in lower stand biomass and productivity in  
31 a tropical rain forest. *Journal of Ecology*, 98(1), 106–116. doi:10.1111/j.1365-  
32 2745.2009.01604.x
- 33 Fine, P. V. A., & Baraloto, C. (2016). Habitat Endemism in White-sand Forests: Insights into  
34 the Mechanisms of Lineage Diversification and Community Assembly of the  
35 Neotropical Flora. *Biotropica*, 48(1), 24–33. doi:10.1111/btp.12301
- 36 Fine, P. V. A., García-Villacorta, R., Pitman, N. C. A., Mesones, I., & Kembel, S. W. (2010).  
37 A floristic study of the white-sand forests of Peru. *Annals of the Missouri Botanical*  
38 *Garden*, 97(3), 283–305.

- 1 Fine, P. V. A., Metz, M. R., Lokvam, J., Mesones, I., Zuñiga, J. M. A., Lamarre, G. P. A., ...  
2 Baraloto, C. (2013). Insect herbivores, chemical innovation, and the evolution of  
3 habitat specialization in Amazonian trees. *Ecology*, *94*(8), 1764–1775.  
4 doi:10.1890/12-1920.1
- 5 Fine, P. V. A., Zapata, F., Daly, D. C., Mesones, I., Misiewicz, T. M., Cooper, H. F., &  
6 Barbosa, C. E. A. (2013). The importance of environmental heterogeneity and spatial  
7 distance in generating phylogeographic structure in edaphic specialist and generalist  
8 tree species of Protium (Burseraceae) across the Amazon Basin. *Journal of*  
9 *Biogeography*, *40*(4), 646–661. doi:10.1111/j.1365-2699.2011.02645.x
- 10 Fortunel, C., Fine, P. V. A., & Baraloto, C. (2012). Leaf, stem and root tissue strategies across  
11 758 Neotropical tree species. *Functional Ecology*, *26*(5), 1153–1161.  
12 doi:10.1111/j.1365-2435.2012.02020.x
- 13 Fortunel, C., Paine, C. E. T., Fine, P. V. A., Kraft, N. J. B., & Baraloto, C. (2014).  
14 Environmental factors predict community functional composition in Amazonian  
15 forests. *Journal of Ecology*, *102*(1), 145–155. doi:10.1111/1365-2745.12160
- 16 Fortunel, C., Ruelle, J., Beauchêne, J., Fine, P. V. A., & Baraloto, C. (2014). Wood specific  
17 gravity and anatomy of branches and roots in 113 Amazonian rainforest tree species  
18 across environmental gradients. *New Phytologist*, *202*(1), 79–94.  
19 doi:10.1111/nph.12632
- 20 Freschet, G. T., Valverde-Barrantes, O. J., Tucker, C. M., Craine, J. M., McCormack, M. L.,  
21 Violle, C., ... Roumet, C. (2017). Climate, soil and plant functional types as drivers of  
22 global fine-root trait variation. *Journal of Ecology*, *105*(5), 1182–1196.  
23 doi:10.1111/1365-2745.12769
- 24 Fyllas, N. M., Patiño, S., Baker, T. R., Bielefeld Nardoto, G., Martinelli, L. A., Quesada, C.  
25 A., ... Lloyd, J. (2009). Basin-wide variations in foliar properties of Amazonian  
26 forest: phylogeny, soils and climate. *Biogeosciences*, *6*(11), 2677–2708.  
27 doi:10.5194/bg-6-2677-2009
- 28 Genolini, C., & Falissard, B. (2009). KmL: k-means for longitudinal data. *Computational*  
29 *Statistics*, *25*(2), 317–328. doi:10.1007/s00180-009-0178-4
- 30 Gleason, S. M., Blackman, C. J., Gleason, S. T., McCulloh, K. A., Ocheltree, T. W., &  
31 Westoby, M. (n.d.). Vessel scaling in evergreen angiosperm leaves conforms with  
32 Murray's law and area-filling assumptions: implications for plant size, leaf size and  
33 cold tolerance. *New Phytologist*, *218*(4), 1360–1370. doi:10.1111/nph.15116
- 34 Godin, C., & Caraglio, Y. (1998). A Multiscale Model of Plant Topological Structures.  
35 *Journal of Theoretical Biology*, *191*(1), 1–46. doi:10.1006/jtbi.1997.0561
- 36 Godin, Christophe, Costes, E., & Caraglio, Y. (1997). Exploring plant topological structure  
37 with the AMAPmod software: an outline. Retrieved from  
38 <https://helda.helsinki.fi/handle/1975/8533>
- 39 Gourlet-Fleury, S., Guehl, J. M., & Laroussine, O. (2004). *Ecology and management of a*  
40 *neotropical rainforest □: lessons drawn from Paracou, a long-term experimental*



- 1            *research site in French Guiana*. Paris: Elsevier. Retrieved from  
2            [http://publications.cirad.fr/une\\_notice.php?dk=522004](http://publications.cirad.fr/une_notice.php?dk=522004)
- 3        Grubb, P. J., & Coomes, D. A. (1997). Seed mass and nutrient content in nutrient-starved  
4            tropical rainforest in Venezuela. *Seed Science Research*, 7(3), 269–280.  
5            doi:10.1017/S0960258500003627
- 6        Guédon, Y., Barthélémy, D., Caraglio, Y., & Costes, E. (2001). Pattern analysis in branching  
7            and axillary flowering sequences. *Journal of Theoretical Biology*, 212(4), 481–520.  
8            doi:10.1006/jtbi.2001.2392
- 9        Guédon, Y., Heuret, P., & Costes, E. (2003). Comparison methods for branching and axillary  
10           flowering sequences. *Journal of Theoretical Biology*, 225(3), 301–325.
- 11       Guédon, Yann, Caraglio, Y., Heuret, P., Lebarbier, E., & Meredieu, C. (2007). Analyzing  
12           growth components in trees. *Journal of Theoretical Biology*, 248(3), 418–447.  
13           doi:10.1016/j.jtbi.2007.05.029
- 14       Guitet, S., Freycon, V., Brunaux, O., Péliissier, R., Sabatier, D., & Couteron, P. (2016).  
15           Geomorphic control of rain-forest floristic composition in French Guiana: more than a  
16           soil filtering effect? *Journal of Tropical Ecology*, 32(1), 22–40.  
17           doi:10.1017/S0266467415000620
- 18       Hendry, A. P. (2016). Key Questions on the Role of Phenotypic Plasticity in Eco-  
19           Evolutionary Dynamics. *The Journal of Heredity*, 107(1), 25–41.  
20           doi:10.1093/jhered/esv060
- 21       Heuret, P., Barthélémy, D., Guédon, Y., Coulmier, X., & Tancre, J. (2002). Synchronization  
22           of growth, branching and flowering processes in the South American tropical tree  
23           *Cecropia obtusa* (Cecropiaceae). *American Journal of Botany*, 89(7), 1180–1187.  
24           doi:10.3732/ajb.89.7.1180
- 25       John, R., Dalling, J. W., Harms, K. E., Yavitt, J. B., Stallard, R. F., Mirabello, M., ... Foster,  
26           R. B. (2007). Soil nutrients influence spatial distributions of tropical tree species.  
27           *Proceedings of the National Academy of Sciences*, 104(3), 864–869.  
28           doi:10.1073/pnas.0604666104
- 29       Kanagaraj, R., Wiegand, T., Comita, L. S., & Huth, A. (2011). Tropical tree species  
30           assemblages in topographical habitats change in time and with life stage. *Journal of*  
31           *Ecology*, 99(6), 1441–1452. doi:10.1111/j.1365-2745.2011.01878.x
- 32       Kassambara, A., & Mundt, F. (2016). Factoextra: Extract and Visualize the Results of  
33           Multivariate Data Analyses.
- 34       Lopez, O. R., & Kursar, T. A. (2003). Does Flood Tolerance Explain Tree Species  
35           Distribution in Tropical Seasonally Flooded Habitats? *Oecologia*, 136(2), 193–204.
- 36       Moczek, A. P., Sultan, S., Foster, S., Ledón-Rettig, C., Dworkin, I., Nijhout, H. F., ...  
37           Pfennig, D. W. (2011). The role of developmental plasticity in evolutionary  
38           innovation. *Proceedings of the Royal Society of London B: Biological Sciences*,  
39           rspb20110971. doi:10.1098/rspb.2011.0971

- 1 Nicolini, E., Barthélémy, D., & Heuret, P. (2000). Influence de la densité du couvert forestier  
2 sur le développement architectural de jeunes chênes sessiles, *Quercus petraea* (Matt.)  
3 Liebl. (Fagaceae), en régénération forestière. *Canadian Journal of Botany*.  
4 doi:10.1139/b00-125
- 5 Nicotra, A. B., Atkin, O. K., Bonser, S. P., Davidson, A. M., Finnegan, E. J., Mathesius, U.,  
6 ... van Kleunen, M. (2010). Plant phenotypic plasticity in a changing climate. *Trends*  
7 *in Plant Science*, 15(12), 684–692. doi:10.1016/j.tplants.2010.09.008
- 8 Patiño, S., Lloyd, J., Paiva, R., Baker, T. R., Quesada, C. A., Mercado, L. M., ... Phillips, O.  
9 L. (2009). Branch xylem density variations across the Amazon Basin. *Biogeosciences*,  
10 6(4), 545–568. doi:10.5194/bg-6-545-2009
- 11 Pélissier, R., Dray, S., & Sabatier, D. (2002). Within-Plot Relationships between Tree Species  
12 Occurrences and Hydrological Soil Constraints: An Example in French Guiana  
13 Investigated through Canonical Correlation Analysis. *Plant Ecology*, 162(2), 143–156.
- 14 Poorter, L., Bongers, L., & Bongers, F. (2006). Architecture of 54 Moist-Forest Tree Species:  
15 Traits, Trade-Offs, and Functional Groups. *Ecology*, 87(5), 1289–1301.  
16 doi:10.1890/0012-9658(2006)87[1289:AOMTST]2.0.CO;2
- 17 Poorter, & Rozendaal, D. M. A. (2008). Leaf size and leaf display of thirty-eight tropical tree  
18 species. *Oecologia*, 158(1), 35–46. doi:10.1007/s00442-008-1131-x
- 19 Pradal, C., Coste, J., Boudon, F., Fournier, C., & Godin, C. (2013). *OpenAlea 2.0:*  
20 *Architecture of an integrated modeling environment on the web*. Finnish Society of  
21 Forest Science. Retrieved from <https://hal.archives-ouvertes.fr/hal-01578851>
- 22 R Core Team. (2018). *R: A language and environment for statistical computing*. Vienna,  
23 Austria: R Foundation for Statistical Computing.
- 24 Roy, M., Schimann, H., Braga-Neto, R., Da Silva, R. A. E., Duque, J., Frame, D., ... Neves,  
25 M. A. (2016). Diversity and Distribution of Ectomycorrhizal Fungi from Amazonian  
26 Lowland White-sand Forests in Brazil and French Guiana. *Biotropica*, 48(1), 90–100.  
27 doi:10.1111/btp.12297
- 28 Sabatier, D., Grimaldi, M., Prévost, M.-F., Guillaume, J., Godron, M., Dosso, M., & Curmi,  
29 P. (1997). The influence of soil cover organization on the floristic and structural  
30 heterogeneity of a Guianan rain forest. *Plant Ecology*, 131(1), 81–108.  
31 doi:10.1023/A:1009775025850
- 32 Savolainen, O., Lascoux, M., & Merilä, J. (2013). Ecological genomics of local adaptation.  
33 *Nature Reviews Genetics*, 14(11), 807–820. doi:10.1038/nrg3522
- 34 Savolainen, O., Pyhäjärvi, T., & Knürr, T. (2007). Gene Flow and Local Adaptation in Trees.  
35 *Annual Review of Ecology, Evolution, and Systematics*, 38(1), 595–619.  
36 doi:10.1146/annurev.ecolsys.38.091206.095646
- 37 Siefert, A., Violle, C., Chalmandrier, L., Albert, C. H., Taudiere, A., Fajardo, A., ... Wardle,  
38 D. A. (2015). A global meta-analysis of the relative extent of intraspecific trait  
39 variation in plant communities. *Ecology Letters*, 18(12), 1406–1419.  
40 doi:10.1111/ele.12508

- 1 Stecconi, M., Puntieri, J. G., & Barthélémy, D. (2010). An architectural approach to the  
2 growth forms of *Nothofagus pumilio* (Nothofagaceae) along an altitudinal gradient.  
3 *Botany*, 88(8), 699–709. doi:10.1139/B10-040
- 4 Stropp, J., Sleen, P. V. der, Assunção, P. A., Silva, A. L. da, & Steege, H. T. (2011). Tree  
5 communities of white-sand and terra-firme forests of the upper Rio Negro. *Acta*  
6 *Amazonica*, 41(4), 521–544. doi:10.1590/S0044-59672011000400010
- 7 Taugourdeau, O., Chaubert-Pereira, F., Sabatier, S., & Guédon, Y. (2011). Deciphering the  
8 developmental plasticity of walnut saplings in relation to climatic factors and light  
9 environment. *Journal of Experimental Botany*, err115. doi:10.1093/jxb/err115
- 10 Taugourdeau, O., Dauzat, J., Griffon, S., Sabatier, S., Caraglio, Y., & Barthélémy, D. (2012).  
11 Retrospective analysis of tree architecture in silver fir (*Abies alba* Mill.): ontogenetic  
12 trends and responses to environmental variability. *Annals of Forest Science*, 69(6),  
13 713–721. doi:10.1007/s13595-012-0188-1
- 14 ter Steege, H., Jetten, V. G., Polak, A. M., & Werger, M. J. A. (1993). Tropical rain forest  
15 types and soil factors in a watershed area in Guyana. *Journal of Vegetation Science*,  
16 4(5), 705–716. doi:10.2307/3236137
- 17 ter Steege, H., Pitman, N. C. A., Sabatier, D., Baraloto, C., Salomão, R. P., Guevara, J. E., ...  
18 Silman, M. R. (2013). Hyperdominance in the Amazonian Tree Flora. *Science*,  
19 342(6156), 1243092. doi:10.1126/science.1243092
- 20 Urli, M., Porté, A. J., Cochard, H., Guengant, Y., Burlett, R., & Delzon, S. (2013). Xylem  
21 embolism threshold for catastrophic hydraulic failure in angiosperm trees. *Tree*  
22 *Physiology*, 33(7), 672–683. doi:10.1093/treephys/tpt030
- 23 Valencia, R., Foster, R. B., Villa, G., Condit, R., Svenning, J.-C., Hernández, C., ... Balslev,  
24 H. (2004). Tree species distributions and local habitat variation in the Amazon: large  
25 forest plot in eastern Ecuador. *Journal of Ecology*, 92(2), 214–229.  
26 doi:10.1111/j.0022-0477.2004.00876.x
- 27 Valladares, F., Matesanz, S., Guilhaumon, F., Araújo, M. B., Balaguer, L., Benito-Garzón,  
28 M., ... Zavala, M. A. (2014). The effects of phenotypic plasticity and local adaptation  
29 on forecasts of species range shifts under climate change. *Ecology Letters*, 17(11),  
30 1351–1364. doi:10.1111/ele.12348
- 31 Violle, C., Enquist, B. J., McGill, B. J., Jiang, L., Albert, C. H., Hulshof, C., ... Messier, J.  
32 (2012). The return of the variance: intraspecific variability in community ecology.  
33 *Trends in Ecology & Evolution*, 27(4), 244–252. doi:10.1016/j.tree.2011.11.014
- 34 Wagner, F., Hérault, B., Stahl, C., Bonal, D., & Rossi, V. (2011). Modeling water availability  
35 for trees in tropical forests. *Agricultural and Forest Meteorology*, 151(9), 1202–1213.  
36 doi:10.1016/j.agrformet.2011.04.012
- 37 Wagner, F., Rossi, V., Stahl, C., Bonal, D., & Hérault, B. (2012). Water Availability Is the  
38 Main Climate Driver of Neotropical Tree Growth. *PLOS ONE*, 7(4), e34074.  
39 doi:10.1371/journal.pone.0034074

- 1 West-Eberhard, M. J. (2003). *Developmental Plasticity and Evolution*. Oxford University  
2 Press.
- 3 Westoby, M., Daniel S. Falster, D. S., Angela T. Moles, Peter A. Vesk, & Wright, and I. J.  
4 (2002). Plant Ecological Strategies: Some Leading Dimensions of Variation Between  
5 Species. *Annual Review of Ecology and Systematics*, 33(1), 125–159.  
6 doi:10.1146/annurev.ecolsys.33.010802.150452
- 7 Whitehead, D., Edwards, W. R. N., & Jarvis, P. G. (1984). Conducting sapwood area, foliage  
8 area, and permeability in mature trees of *Piceasitchensis* and *Pinuscontorta*. *Canadian*  
9 *Journal of Forest Research*, 14(6), 940–947. doi:10.1139/x84-166
- 10 Zalamea, P.-C., Heuret, P., Sarmiento, C., Rodríguez, M., Berthouly, A., Guitet, S., ...  
11 Stevenson, P. R. (2012). The Genus *Cecropia*: A Biological Clock to Estimate the Age  
12 of Recently Disturbed Areas in the Neotropics. *PLoS ONE*, 7(8), e42643.  
13 doi:10.1371/journal.pone.0042643
- 14 Zalamea, P.-C., Sarmiento, C., Stevenson, P. R., Rodríguez, M., Nicolini, E., & Heuret, P.  
15 (2013). Effect of rainfall seasonality on the growth of *Cecropia sciadophylla*: intra-  
16 annual variation in leaf production and node length. *Journal of Tropical Ecology*,  
17 29(4), 361–365. doi:10.1017/S0266467413000394
- 18 Zalamea, P.-C., Stevenson, P. R., Madriñán, S., Aubert, P.-M., & Heuret, P. (2008). Growth  
19 pattern and age determination for *Cecropia sciadophylla* (Urticaceae). *American*  
20 *Journal of Botany*, 95(3), 263–271. doi:10.3732/ajb.95.3.263

21

22

1

**Table 1.** List of measured growth and dimension architectural traits.

| Trait                                 | Abbreviation        | Unit           |
|---------------------------------------|---------------------|----------------|
| <i>Architectural growth traits</i>    |                     |                |
| Internode length                      | IN                  | mm             |
| Internode length residuals            |                     | -              |
| Phyllochron                           |                     | day            |
| Annual shoot length                   | AS                  | cm             |
| Number of nodes per AS                |                     | -              |
| Cumulated tree height                 |                     | m              |
| <i>Architectural dimension traits</i> |                     |                |
| Age after determination               | Age                 | year           |
| Tree height                           | Height              | m              |
| Diameter at breast height             | DBH                 | cm             |
| Number of trunk internodes            | IN <sub>A1</sub>    | -              |
| Number of A2 bearing branches         | Br <sub>bear</sub>  | -              |
| Number of A2 dead branches            | Br <sub>dead</sub>  | -              |
| Total number of A2 branches           | Br <sub>tot</sub>   | -              |
| Branching order                       | Order               | -              |
| Total number of inflorescences        | Fl <sub>tot</sub>   | -              |
| Total number of leaves                | Leaf <sub>tot</sub> | -              |
| Total estimated crown area            | A <sub>crown</sub>  | m <sup>2</sup> |
| First branching height                | Br1stH              | m              |
| First flowering height                | Fl1stH              | m              |
| First branching node rank             | Br1stIN             | -              |
| First flowering node rank             | Fl1stIN             | -              |
| First branching age                   | Br1stAge            | year           |
| First flowering age                   | Fl1stAge            | year           |

2

3

4

1

**Table 2.** List of measured functional traits and the inferred growth rate.

| <b>Trait</b>                     | <b>Abbreviation</b>   | <b>Unit</b>   |
|----------------------------------|-----------------------|---------------|
| <i>Leaf content traits</i>       |                       |               |
| Residual moisture content        | $H_2O_{res,leaf}$     | %             |
| $\delta^{13}C$ content           | $\delta^{13}C_{leaf}$ | ‰             |
| Carbon content                   | $C_{leaf}$            | $g\ kg^{-1}$  |
| Nitrogen content                 | $N_{leaf}$            | $g\ kg^{-1}$  |
| Carbon/Nitrogen ratio            | $CN_{leaf}$           | -             |
| Phosphorus content               | $P_{leaf}$            | $g\ kg^{-1}$  |
| Potassium content                | $K_{leaf}$            | $g\ kg^{-1}$  |
| Chlorophyll content              | $Chl_{leaf}$          | $mg\ ml^{-1}$ |
| <i>Leaf morphological traits</i> |                       |               |
| Leaf lifespan                    | LL                    | day           |
| Petiole length                   | $L_{pet}$             | cm            |
| Petiole cross-sectional area     | $A_{pet}$             | $mm^2$        |
| Number of lobes                  | $N_{lobe}$            | -             |
| Leaf mass area                   | LMA                   | $g\ cm^{-2}$  |
| Leaf thickness                   | $Th_{leaf}$           | $\mu m$       |
| Estimated leaf area              | $A_{leaf}$            | $cm^2$        |
| <i>Wood trait</i>                |                       |               |
| Wood specific gravity            | WSG                   | $g\ cm^{-3}$  |

2

3

1

**Table 3.** Nested-ANOVA for measured architectural dimension traits between soil types and sites.

| Abbreviation        | Unit           | $P_{\text{ontogeny}}$ | $P_{\text{ANOVA}}$ | Counami FS (N = 13) | Counami WS (N = 19) | Sparouine FS (N = 19) | Sparouine WS (N = 19) | Range         |
|---------------------|----------------|-----------------------|--------------------|---------------------|---------------------|-----------------------|-----------------------|---------------|
| Height              | m              | -                     | <b>0.001</b>       | 16.13 ± 1.92 a      | 13.31 ± 1.10 b      | 18.98 ± 0.65 a        | 17.27 ± 0.99 ab       | 10.05 – 21.99 |
| DBH                 | cm             | -                     | <b>0.049</b>       | 15.02 ± 2.24 ab     | 12.44 ± 2.33 a      | 19.30 ± 0.97 b        | 18.24 ± 0.52 ab       | 6.21 – 30.49  |
| IN <sub>A1</sub>    | -              | <b>0.001</b>          | 0.760              | 429.2 ± 87.0        | 457.9 ± 35.0        | 289.5 ± 10.1          | 277.9 ± 14.8          | 221 - 765     |
| Br <sub>bear</sub>  | -              | <b>0.001</b>          | 0.139              | 7.85 ± 1.75         | 4.32 ± 1.55         | 10.74 ± 1.79          | 11.11 ± 1.82          | 0 - 19        |
| Br <sub>dead</sub>  | -              | -                     | 0.428              | 10.23 ± 6.02        | 7.47 ± 1.97         | 12.84 ± 2.35          | 10.58 ± 2.81          | 0 - 33        |
| Br <sub>tot</sub>   | -              | <b>0.023</b>          | 0.373              | 13.62 ± 4.07        | 6.79 ± 2.90         | 21.47 ± 3.80          | 24.16 ± 8.17          | 1 - 75        |
| Order               | -              | -                     | <b>0.006</b>       | 2.92 ± 0.41 a       | 2.32 ± 0.26 b       | 3.16 ± 0.17 ab        | 3.26 ± 0.20 ab        | 1 - 4         |
| Fl <sub>tot</sub>   | -              | -                     | 0.330              | 55.54 ± 17.11       | 46.42 ± 12.31       | 75.68 ± 24.95         | 121.9 ± 68.0          | 0 - 657       |
| Leaf <sub>tot</sub> | -              | -                     | 0.167              | 140.6 ± 37.6        | 75.74 ± 31.54       | 170.74 ± 31.35        | 200.3 ± 72.7          | 25 - 674      |
| A <sub>crown</sub>  | m <sup>2</sup> | <b>0.001</b>          | 0.188              | 16.44 ± 6.11        | 6.893 ± 3.472       | 21.79 ± 4.17          | 26.78 ± 7.89          | 1.656 - 74.10 |
| Br1stH              | m              | -                     | <b>0.001</b>       | 9.04 ± 0.80 a       | 8.20 ± 0.80 a       | 10.45 ± 0.50 b        | 9.05 ± 0.85 b         | 5.27 – 14.56  |
| Fl1stH              | m              | -                     | <b>0.001</b>       | 11.29 ± 1.38 a      | 9.12 ± 0.89 b       | 18.67 ± 0.71 c        | 16.71 ± 0.94 c        | 6.62 – 20.99  |
| Br1stIN             | -              | -                     | <b>0.048</b>       | 141.8 ± 22.6 a      | 178.7 ± 32.1 b      | 117.0 ± 6.8 ab        | 113.7 ± 8.6 ab        | 81 - 358      |
| Fl1stIN             | -              | -                     | 0.079              | 188.6 ± 26.3        | 198.6 ± 32.7        | 284.2 ± 7.9           | 264.1 ± 13.9          | 101 - 412     |
| Br1stAge            | year           | -                     | 0.092              | 4.272 ± 0.752       | 5.297 ± 1.053       | 3.358 ± 0.220         | 3.263 ± 0.275         | 2.332 – 11.94 |
| Fl1stAge            | year           | -                     | 0.124              | 5.709 ± 0.821       | 8.833 ± 0.986       | 8.307 ± 0.231         | 7.699 ± 0.406         | 3.132 – 11.49 |

$P_{\text{ontogeny}}$  refers to the p-value associated with a test of the effect of ontogeny on the trait based on a linear regression.  $P_{\text{ANOVA}}$  refers to the p-value associated with a test of soil and site effects on traits based on a nested-ANOVA. Bold values are for significant correlations ( $P < 0.05$ ). Letters refer to differences in average based on Tukey's HSD (Honest Significant Difference) test. See Table 3 for definitions of abbreviations. See Table 1 for definitions of abbreviations.

2  
3  
4

1

**Table 4.** Nested-ANOVA for measured functional traits between soil types and sites.

| Abbreviation                         | Unit                | $P_{\text{ontogeny}}$ | $P_{\text{ANOVA}}$ | Counami FS (N = 13) | Counami WS (N = 19) | Sparouine FS (N = 19) | Sparouine WS (N = 19) | Range           |
|--------------------------------------|---------------------|-----------------------|--------------------|---------------------|---------------------|-----------------------|-----------------------|-----------------|
| H <sub>2</sub> O <sub>res,leaf</sub> | %                   | < <b>0.001</b>        | 0.057              | 9.921 ± 0.557       | 10.18 ± 0.26        | 7.823 ± 0.132         | 8.255 ± 0.124         | 7.38 – 11.50    |
| δ <sup>13</sup> C <sub>leaf</sub>    | ‰                   | -                     | 0.296              | -29.61 ± 0.38       | -29.74 ± 0.50       | -29.30 ± 0.19         | -29.78 ± 0.31         | -32.12 – -28.41 |
| C <sub>leaf</sub>                    | g kg <sup>-1</sup>  | -                     | 0.303              | 46.99 ± 0.39        | 46.27 ± 0.41        | 47.12 ± 0.22          | 46.74 ± 0.84          | 39.11 – 48.04   |
| N <sub>leaf</sub>                    | g kg <sup>-1</sup>  | < <b>0.001</b>        | 0.582              | 2.531 ± 0.253       | 2.312 ± 0.170       | 2.649 ± 0.111         | 2.743 ± 0.177         | 1.630 – 3.200   |
| CN <sub>leaf</sub>                   | -                   | < <b>0.001</b>        | 0.706              | 19.13 ± 1.87        | 20.52 ± 1.52        | 17.95 ± 0.85          | 17.16 ± 0.67          | 14.84 – 28.01   |
| P <sub>leaf</sub>                    | g kg <sup>-1</sup>  | -                     | 0.367              | 1.687 ± 0.305       | 1.698 ± 0.205       | 1.322 ± 0.231         | 1.178 ± 0.059         | 0.588 – 2.42    |
| K <sub>leaf</sub>                    | g kg <sup>-1</sup>  | -                     | 0.065              | 16.31 ± 2.98        | 14.56 ± 2.43        | 12.30 ± 2.32          | 9.099 ± 0.865         | 4.88 – 27.50    |
| Chl <sub>leaf</sub>                  | mg ml <sup>-1</sup> | < <b>0.01</b>         | 0.851              | 62.16 ± 9.73        | 53.50 ± 6.51        | 101.4 ± 20.6          | 110.7 ± 31.5          | 31.1 – 309.0    |
| LL                                   | day                 | <b>0.016</b>          | 0.352              | 117.3 ± 16.8        | 110.3 ± 10.8        | 79.96 ± 0.542         | 83.82 ± 0.626         | 58 – 181        |
| L <sub>pet</sub>                     | cm                  | < <b>0.001</b>        | <b>0.015</b>       | 37.19 ± 4.60 b      | 27.34 ± 3.32 a      | 42.79 ± 3.62 ab       | 47.5 ± 2.70 ab        | 14.2 – 62.0     |
| A <sub>pet</sub>                     | mm <sup>2</sup>     | < <b>0.001</b>        | 0.216              | 67.78 ± 12.36       | 47.90 ± 7.22        | 77.07 ± 12.41         | 81.35 ± 8.88          | 25.1 – 126.3    |
| N <sub>iobe</sub>                    | -                   | -                     | 0.160              | 7.923 ± 0.268       | 7.353 ± 0.316       | 7.667 ± 0.267         | 8.000 ± 0.218         | 6 – 9           |
| LMA                                  | g m <sup>-2</sup>   | <b>0.002</b>          | 0.141              | 97.42 ± 10.41       | 96.43 ± 7.95        | 99.55 ± 3.74          | 89.06 ± 5.30          | 63.49 – 130.3   |
| Th <sub>leaf</sub>                   | µm                  | < <b>0.001</b>        | 0.505              | 366.2 ± 23.7        | 397.8 ± 19.9        | 314.7 ± 17.6          | 302.9 ± 29.8          | 213 – 482       |
| A <sub>leaf</sub>                    | cm <sup>2</sup>     | < <b>0.001</b>        | <b>0.047</b>       | 1860 ± 393 b        | 1094 ± 215 a        | 2043 ± 362 ab         | 2587 ± 472 ab         | 321 – 4916      |
| WSG                                  | g cm <sup>-3</sup>  | < <b>0.01</b>         | 0.099              | 0.389 ± 0.029       | 0.352 ± 0.019       | 0.325 ± 0.018         | 0.319 ± 0.014         | 0.252 – 0.516   |

$P_{\text{ontogeny}}$  refers to the p-value associated with a test of the effect of ontogeny on the trait based on a linear regression.  $P_{\text{ANOVA}}$  refers to the p-value associated with a test of soil and site effects on traits based on a nested-ANOVA. Bold values are for significant correlations ( $P < 0.05$ ). Letters refer to differences in average based on Tukey's HSD (Honest Significant Difference) test. See Table 2 for definitions of abbreviations.

2

3

4



1 **FIGURE LEGENDS**

2 **Fig. 1.** Autocorrelation function according to growth, flowering, and branching processes. (a)  
3 Internode length residuals for Counami, (b) Internode length residuals for Sparouine, (c)  
4 Flowering presence for Counami, (d) Flowering presence for Sparouine, (e) Branching  
5 presence for Counami, (f) Branching presence for Sparouine. Red: ferralitic soils; black:  
6 white-sand soils.

7 **Fig. 2.** Phyllochron (day) according to the node rank from the base. (a) Counami, (b)  
8 Sparouine. Red: ferralitic soils; black: white-sand soils. Thick lines: means; thin lines: each  
9 individual; dashed lines: confidence intervals at 95%.

10 **Fig. 3.** Architectural growth traits according to age (years). Main boxes represent features  
11 according to soil types. Inboxes represent mean trajectories after clustering longitudinal  
12 analyses (*kml*). The left column represents Counami trees, the right column represents  
13 Sparouine trees. Distributions between soil types and *kml*-trajectories are represented with  
14 Pearson chi-squared test. Red: ferralitic soils; black: white-sand soils. Blue: trajectory A;  
15 green: trajectory B; orange: trajectory C. Thick lines: means; dashed lines: confidence  
16 intervals at 95%.

17 **Fig. 4.** Cumulated number of trunk nodes with pairs of inflorescences and number of branches  
18 per annual shot according to the age (year). (a) and (b) Means for inflorescences for Counami  
19 and Sparouine respectively. (c) and (d) Means for branches for Counami and Sparouine  
20 respectively. Red: ferralitic soils; black: white-sand soils. Thick lines: means, dashed lines:  
21 confidence intervals at 95%.

22 **Fig. 5.** Principal component analysis (PCA) on functional traits for the two sites for 70 trees.  
23 (a) Correlation circle of data with the histogram of inertia. (b) Individual factor map of data  
24 according to soil types and sites. In (a), the colour gradient indicates the contribution of each  
25 variable to the axis. See Table 3 for definitions of abbreviations. “Res” prefixes indicate  
26 residuals after removing the ontogenetic effect. In (b), significant differences in coordinates  
27 ( $P < 0.05$ ; ANOVA) between soil types and sites are indicated by letter according to the  
28 considered axis. Red: ferralitic soils; black: white-sand soils; COU: Counami; SPA:  
29 Sparouine.

30

31

1

2 **SUPPORTING INFORMATION LEGENDS**

3 **Appendix S1.** Pedological characterization: Materials and methods, and results.

4 **Appendix S2.** Materials and methods: residuals, year delineation and inference of age.

5 **Appendix S3.** Materials and methods: measurement of leaf and trunk functional traits.

6 **Fig. S1.** Morphological features of *Cecropia obtusa* Trécul (Urticaceae). (a) Focus on an  
7 apex, ca: calyptra; pe: petiole; if: inflorescence. (b) Focus on a branch tier, br: branch; in:  
8 internode, axis as the trunk are made of a linear succession of internodes; ins: inflorescence  
9 scars, these are twice just above the axillary leaf; les: leaf scar. (c) Focus on an internode, in:  
10 internode; ins: inflorescence scars; les: leaf scar; no: a node marled by the calyptra scar,  
11 allowing for the delineation of internodes along an axis as the trunk.

12 **Fig. S2.** Box plots of mean annual rainfall (mm) from 1980 to 2016. (a) Counami, (b)  
13 Sparouine.

14 **Fig. S3.** Tree heights (m) according to diameters at breast height (cm). Red: ferralitic soils;  
15 black: white-sand soils. Cross: Sparouine; square: Counami.

16

### Internode length residuals

Correlation coefficient

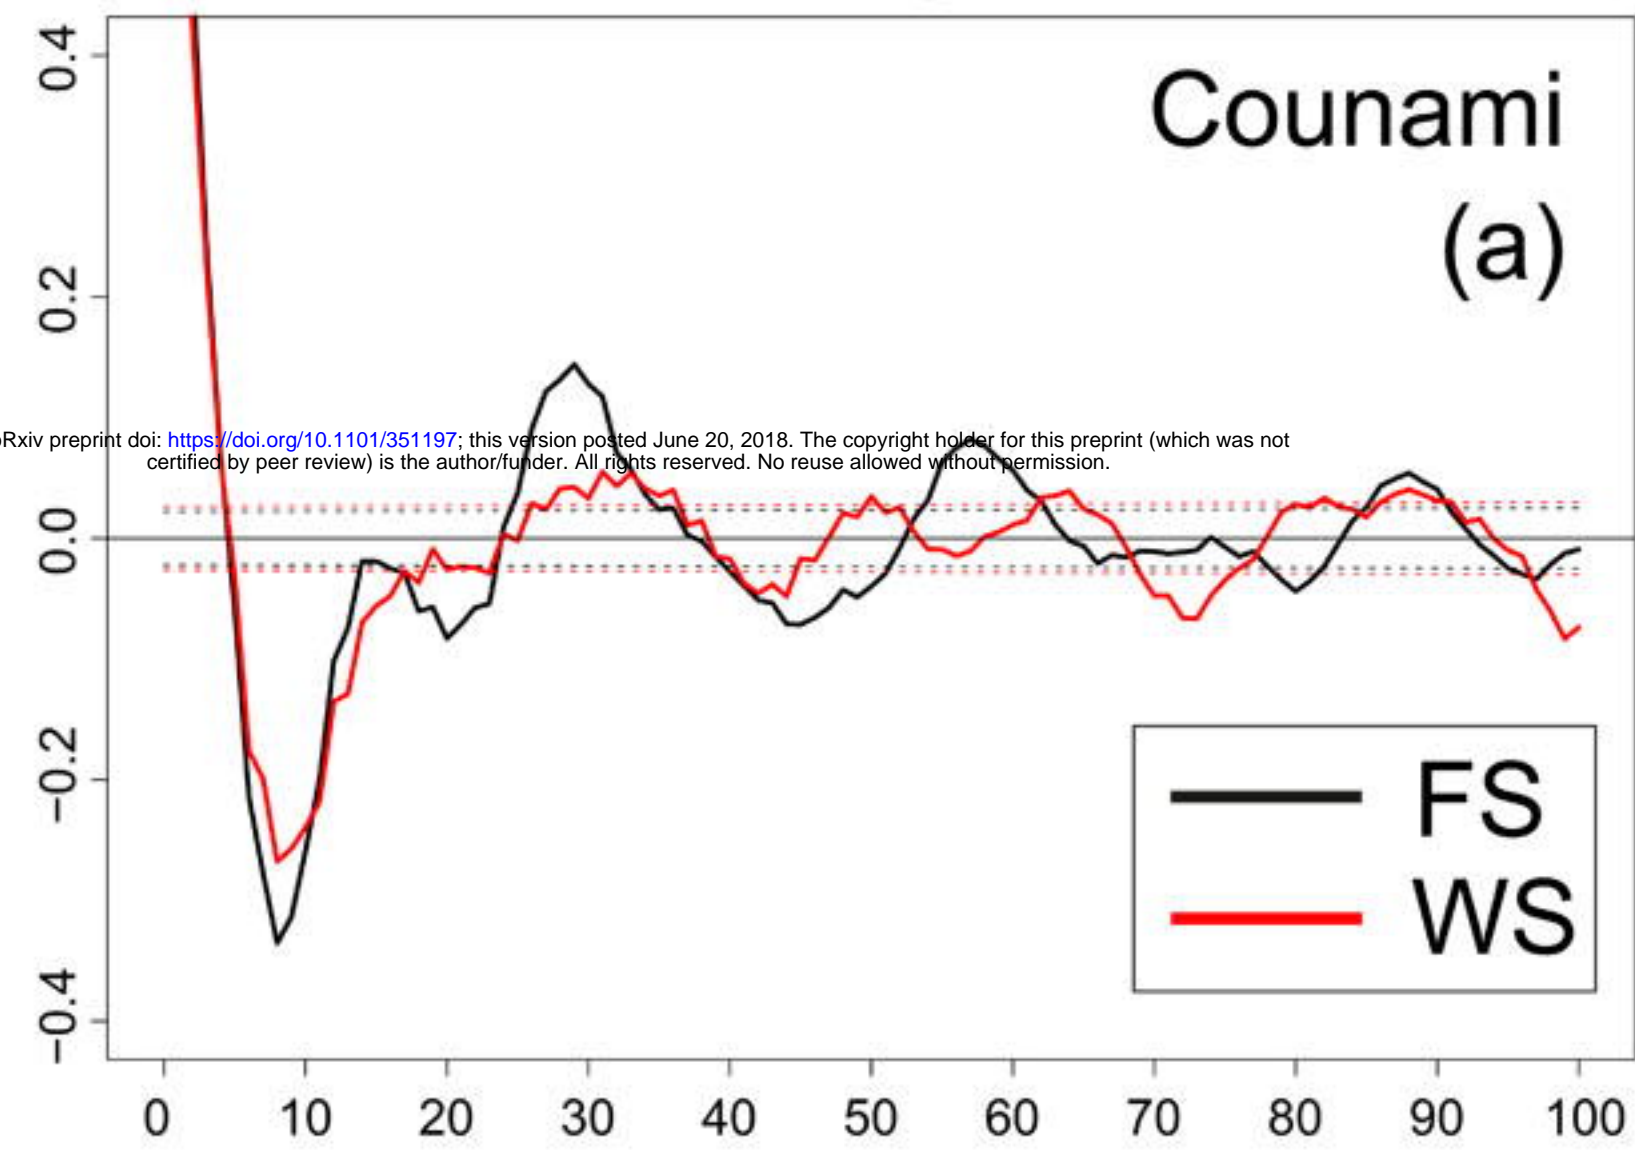

### Flowering

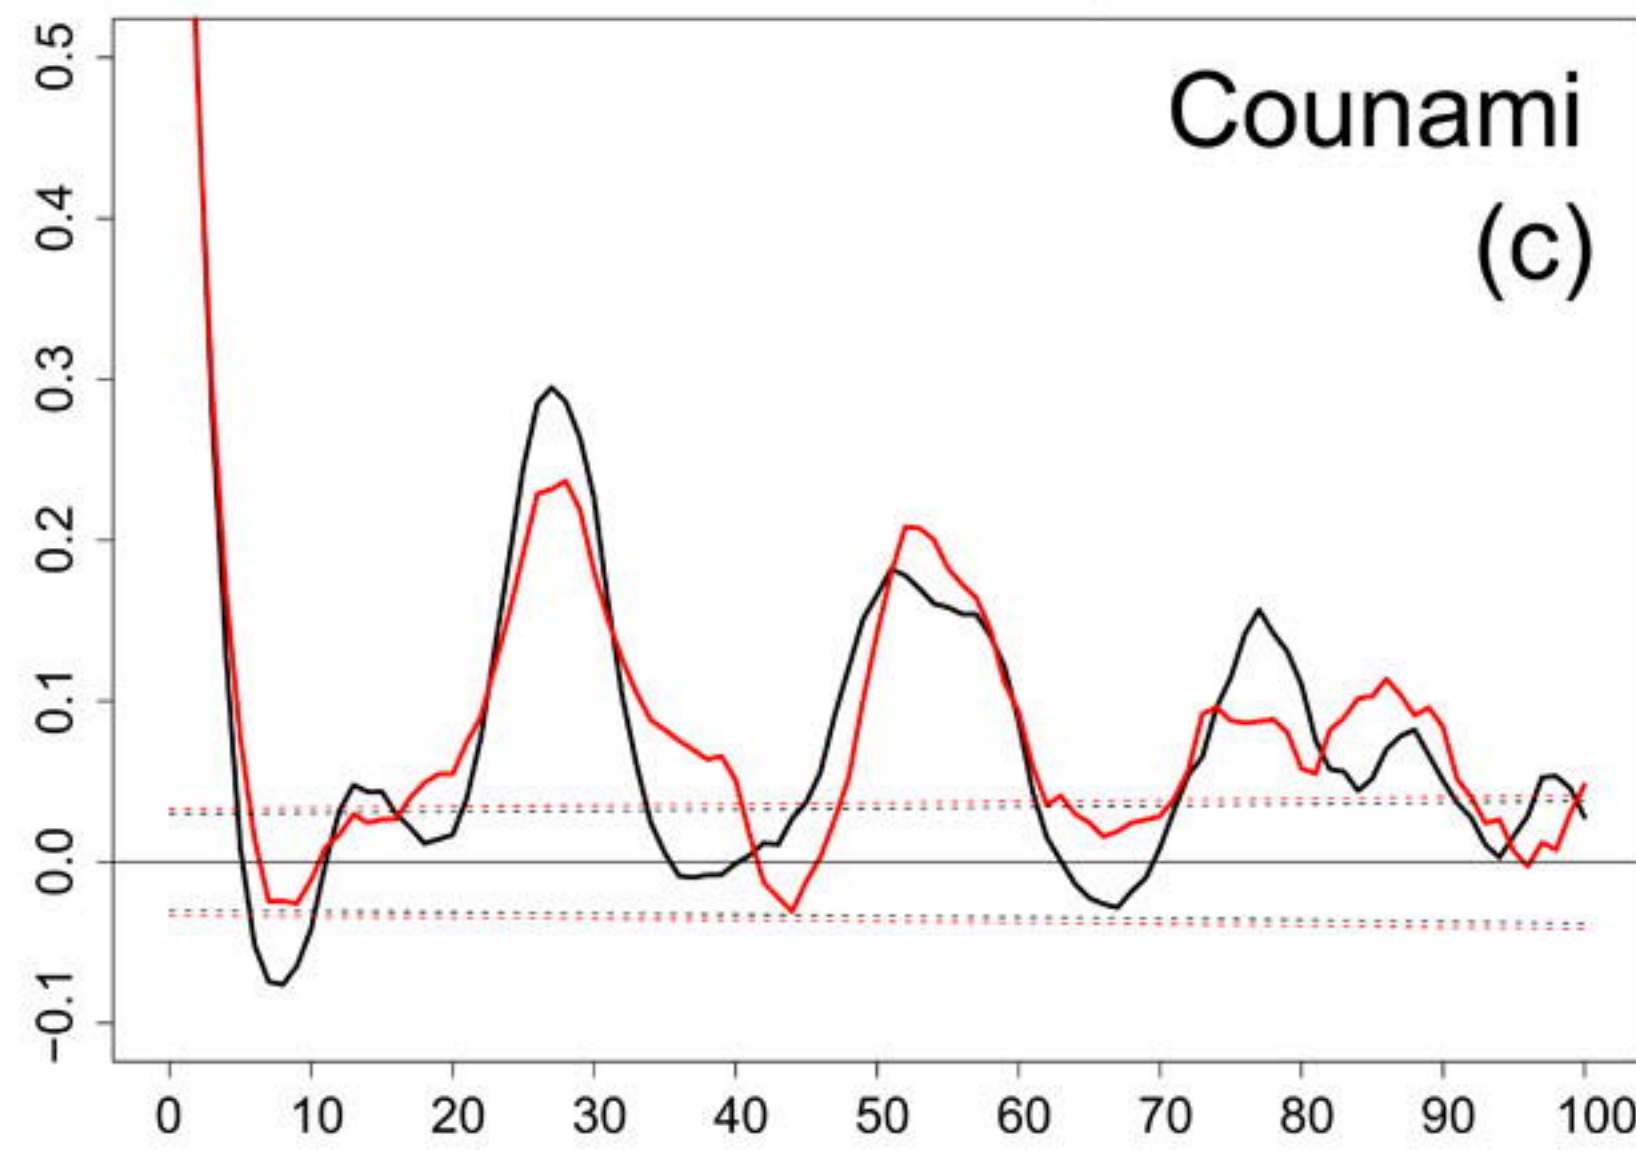

### Branching

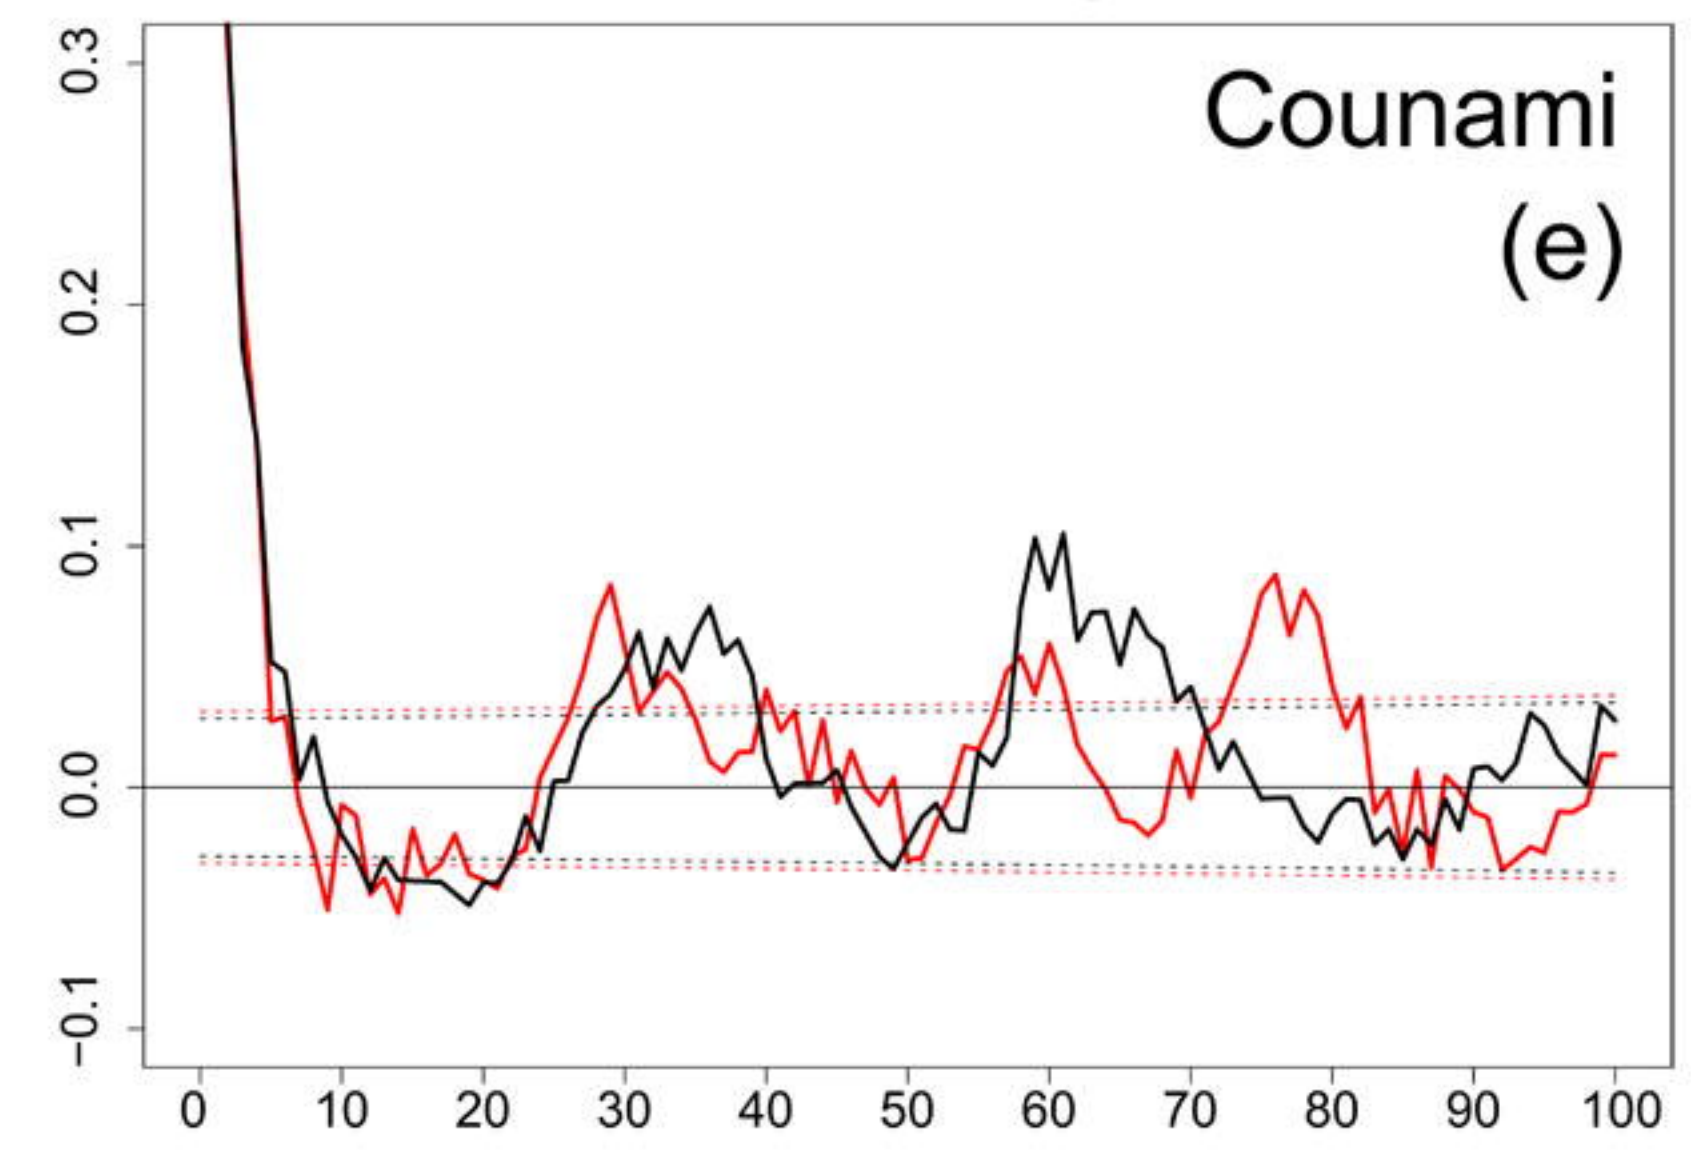

Correlation coefficient

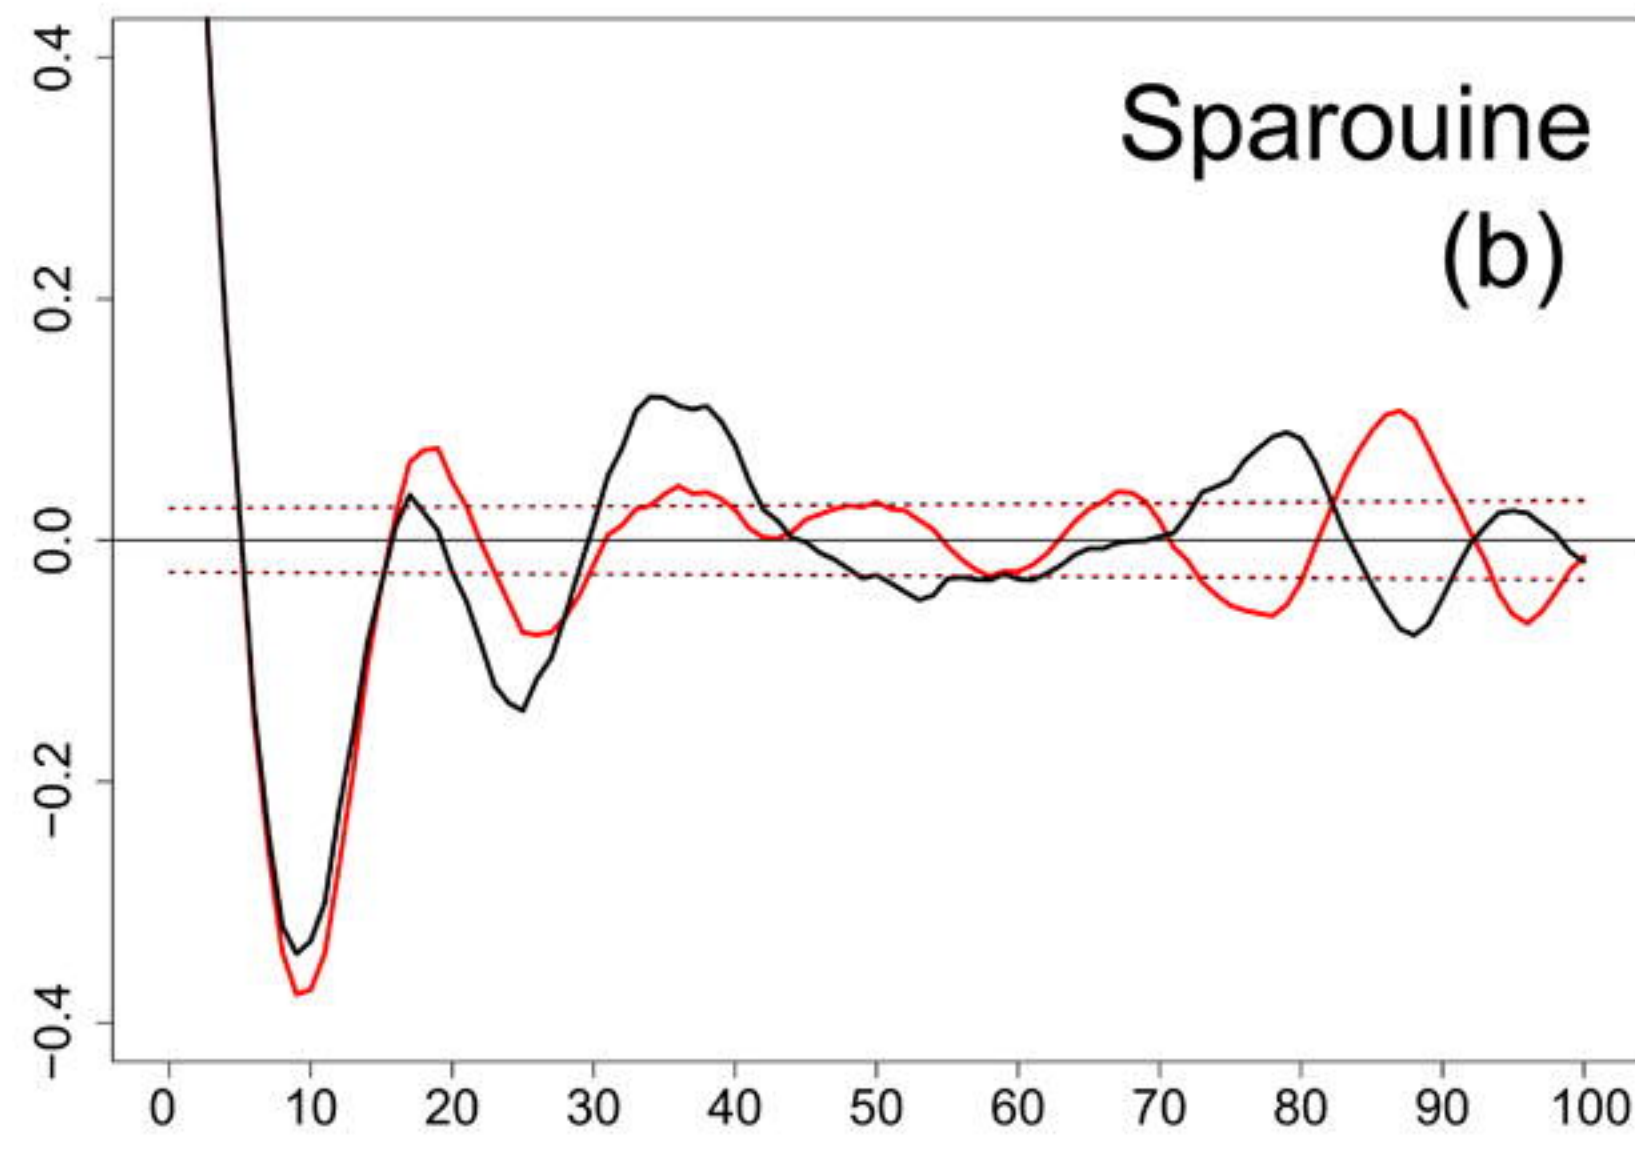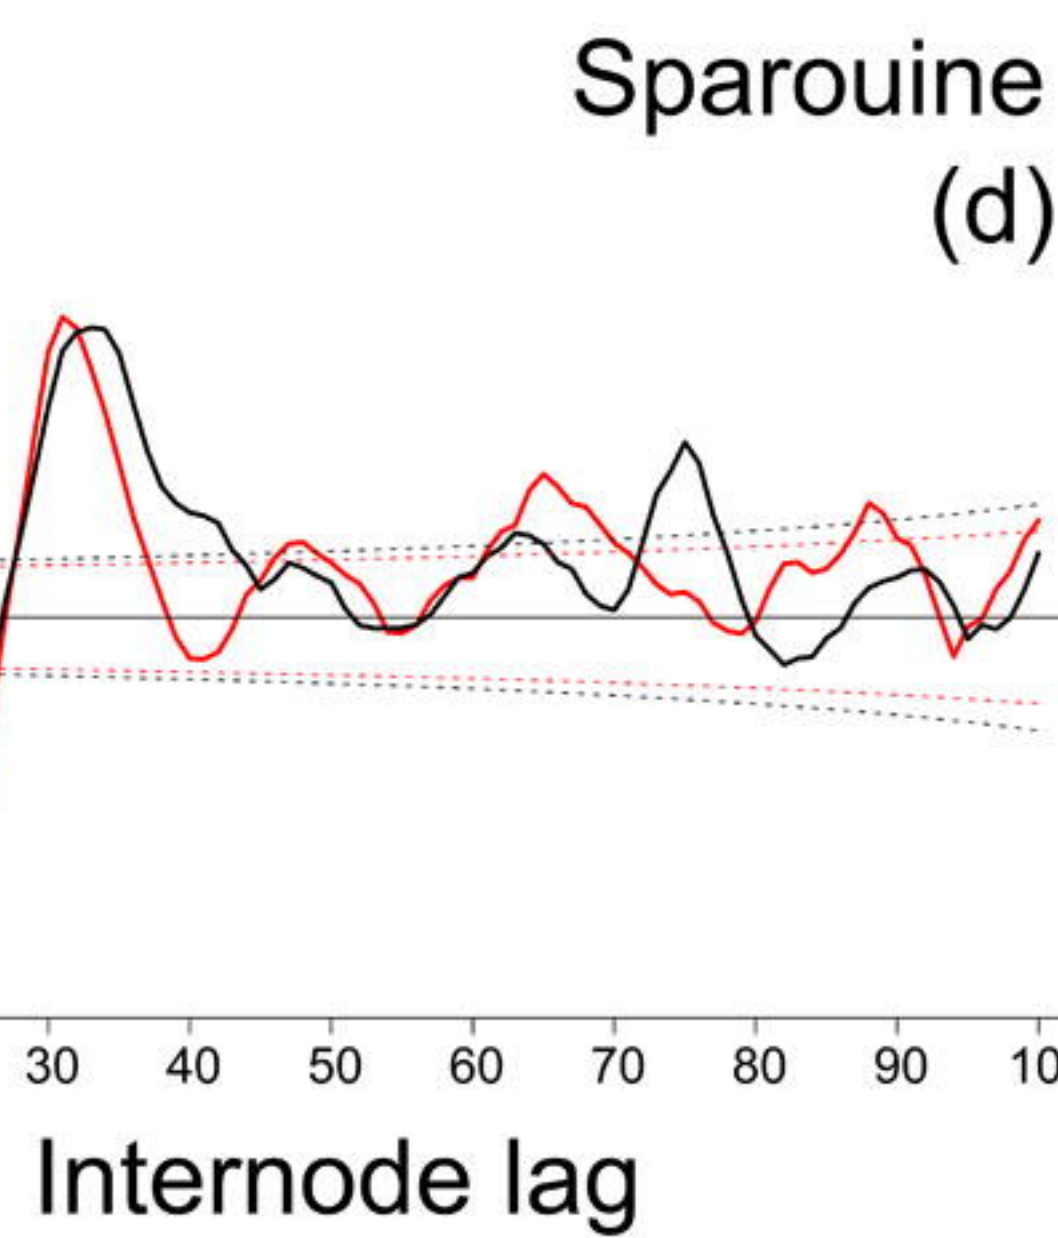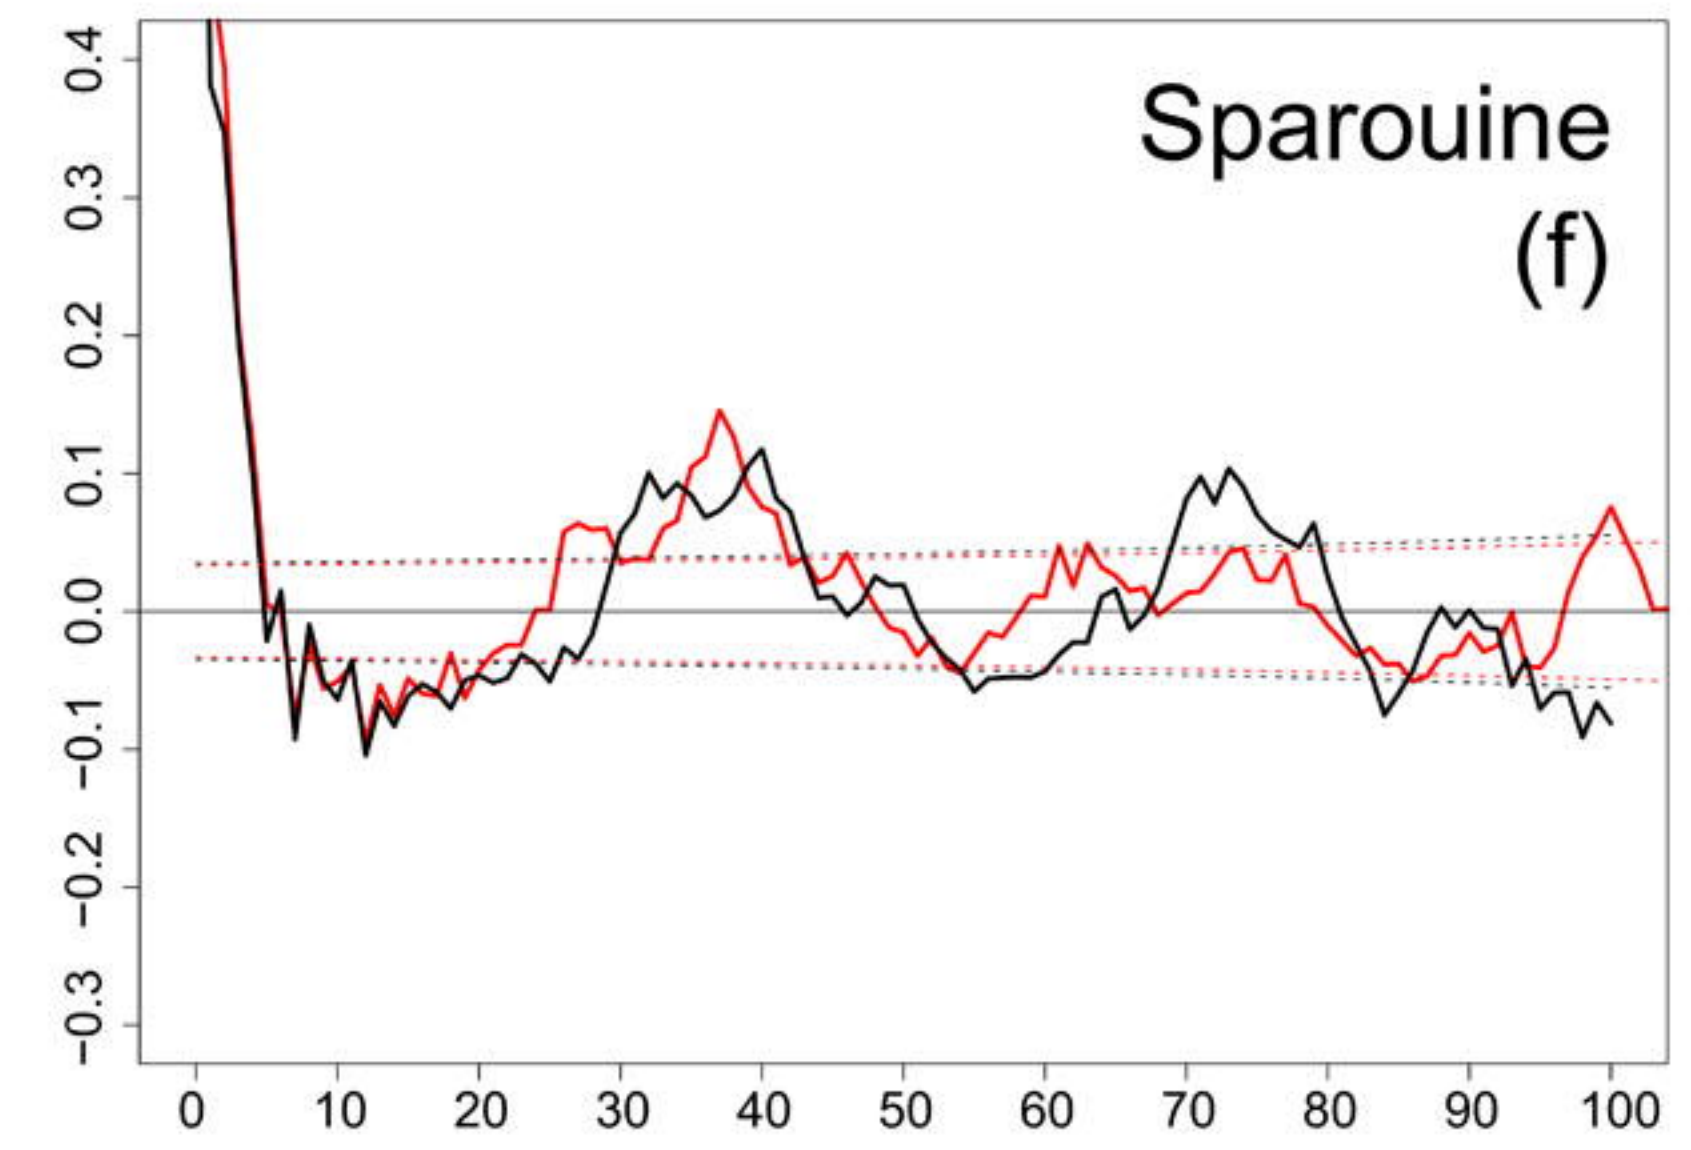

Internode lag

Internode lag

Internode lag

# Counami

Phyllochron (day)

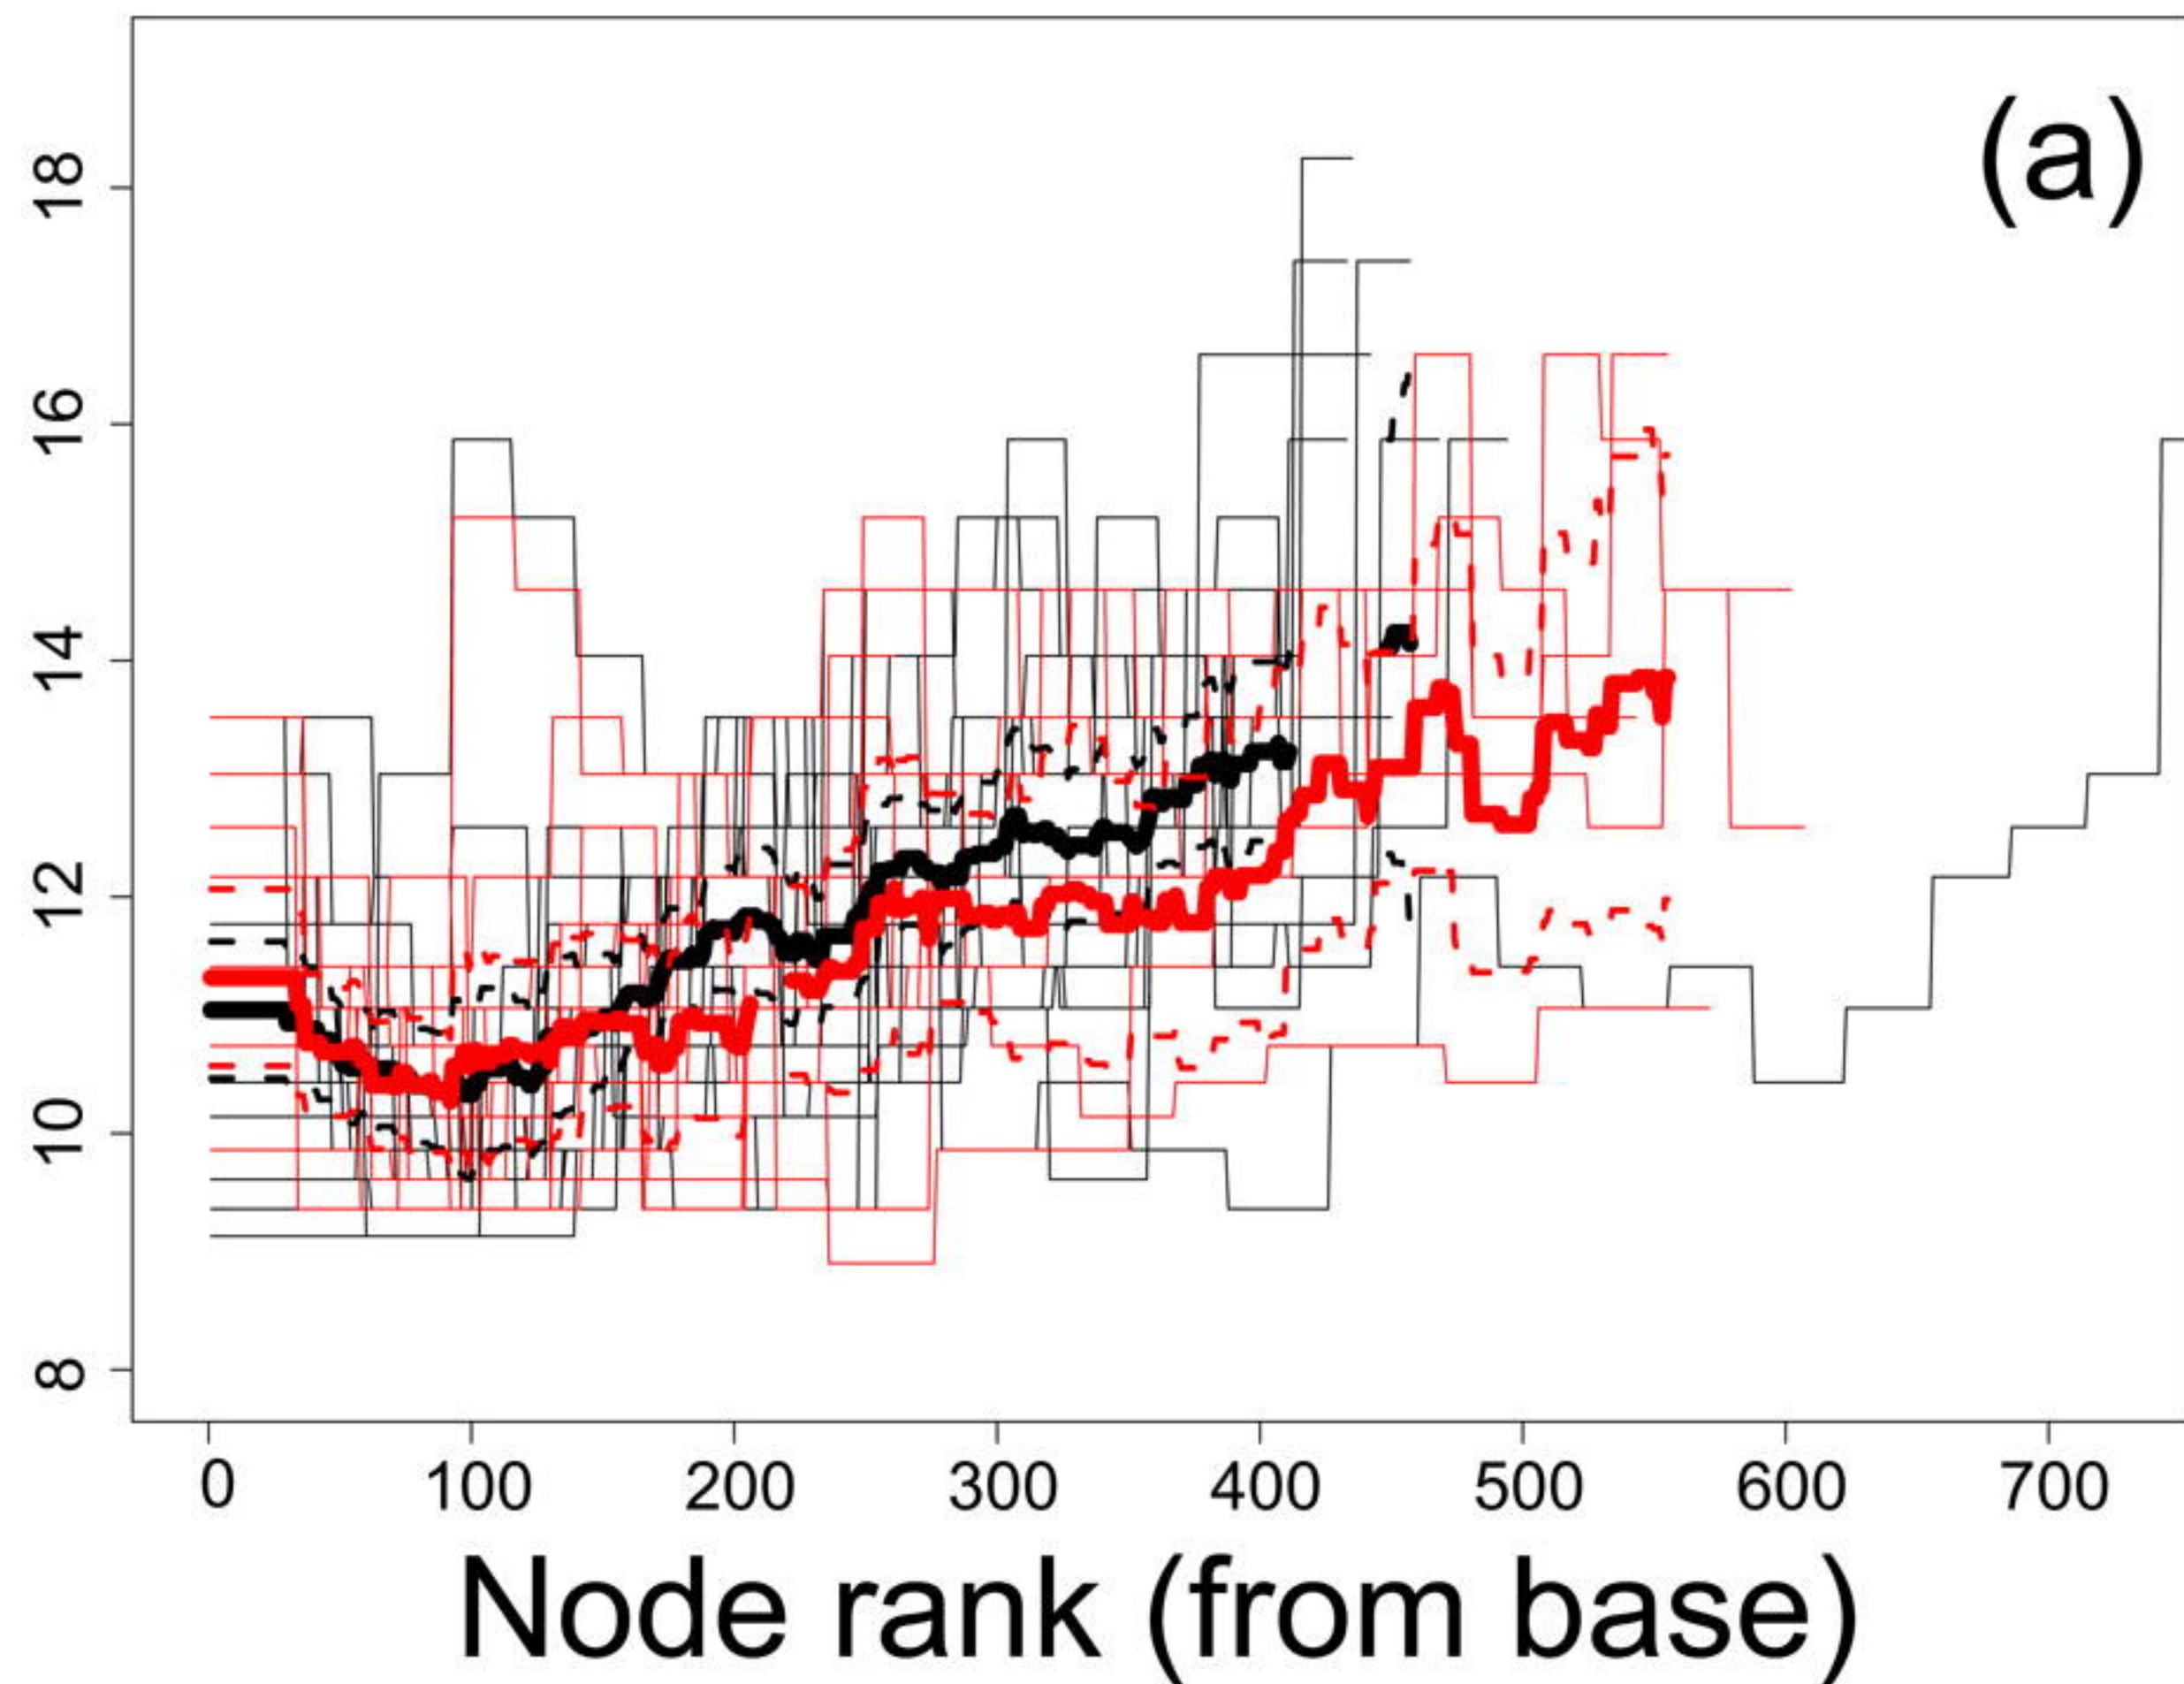

# Sparouine

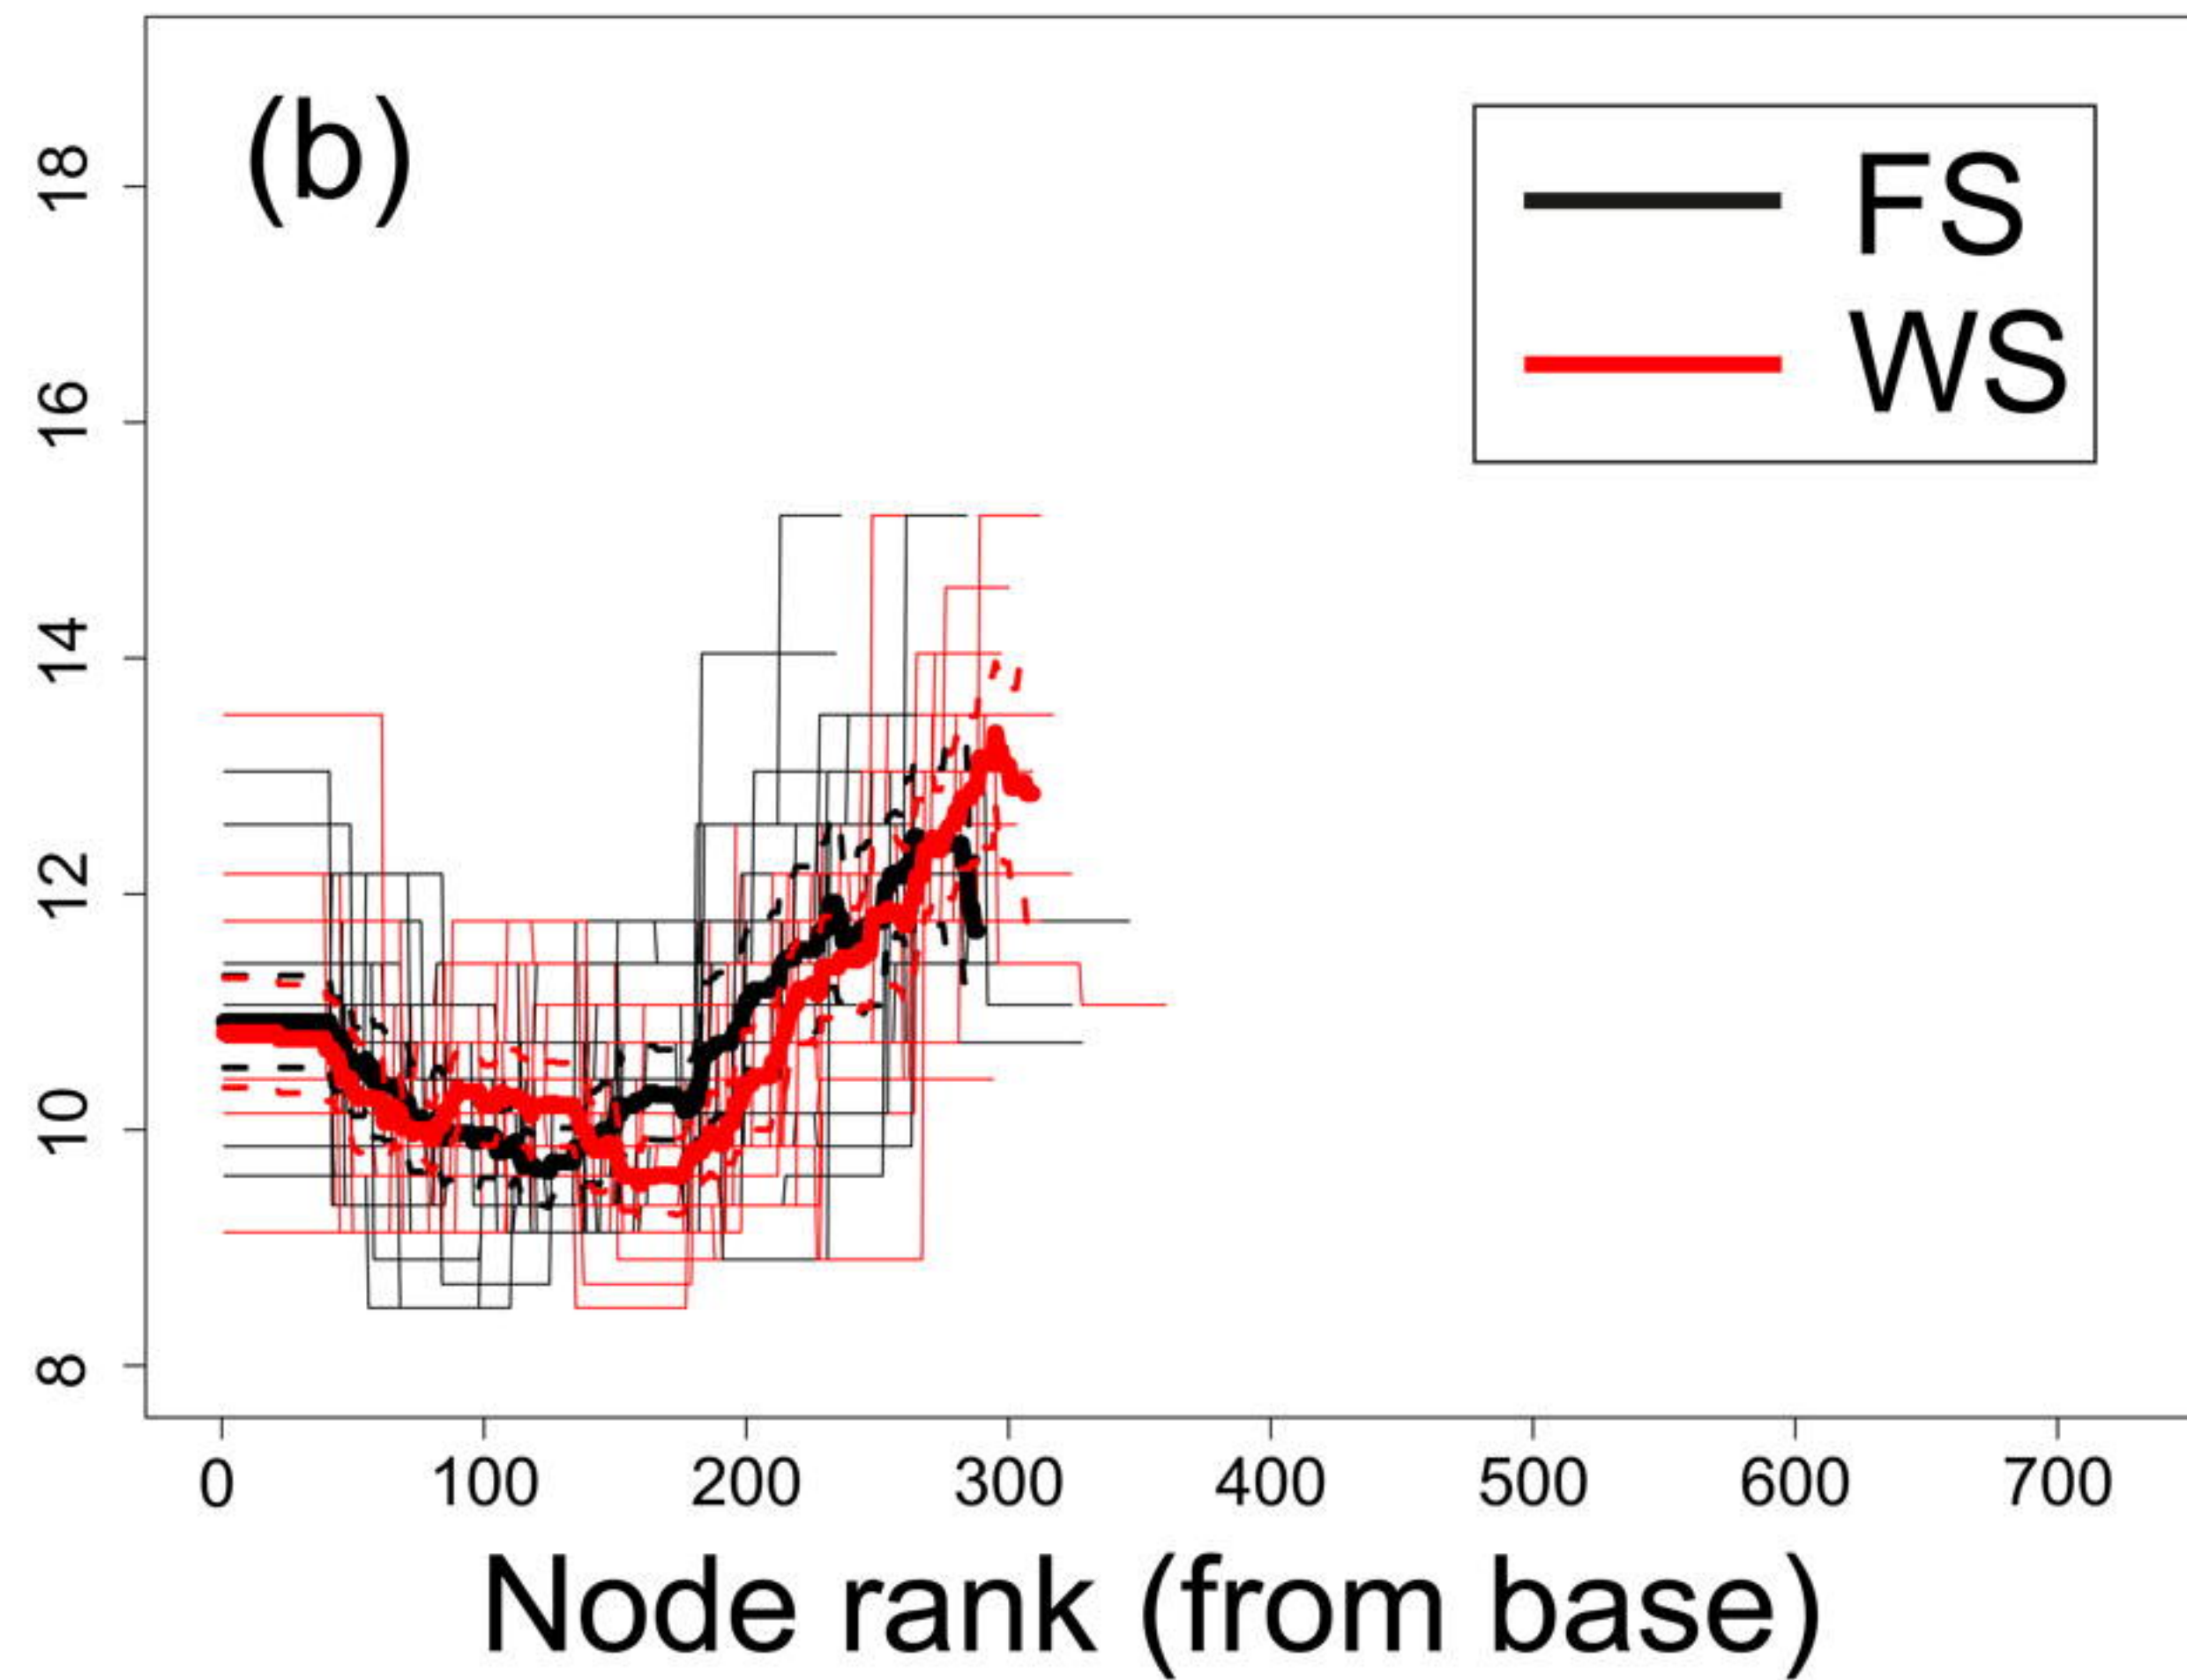

## Counami

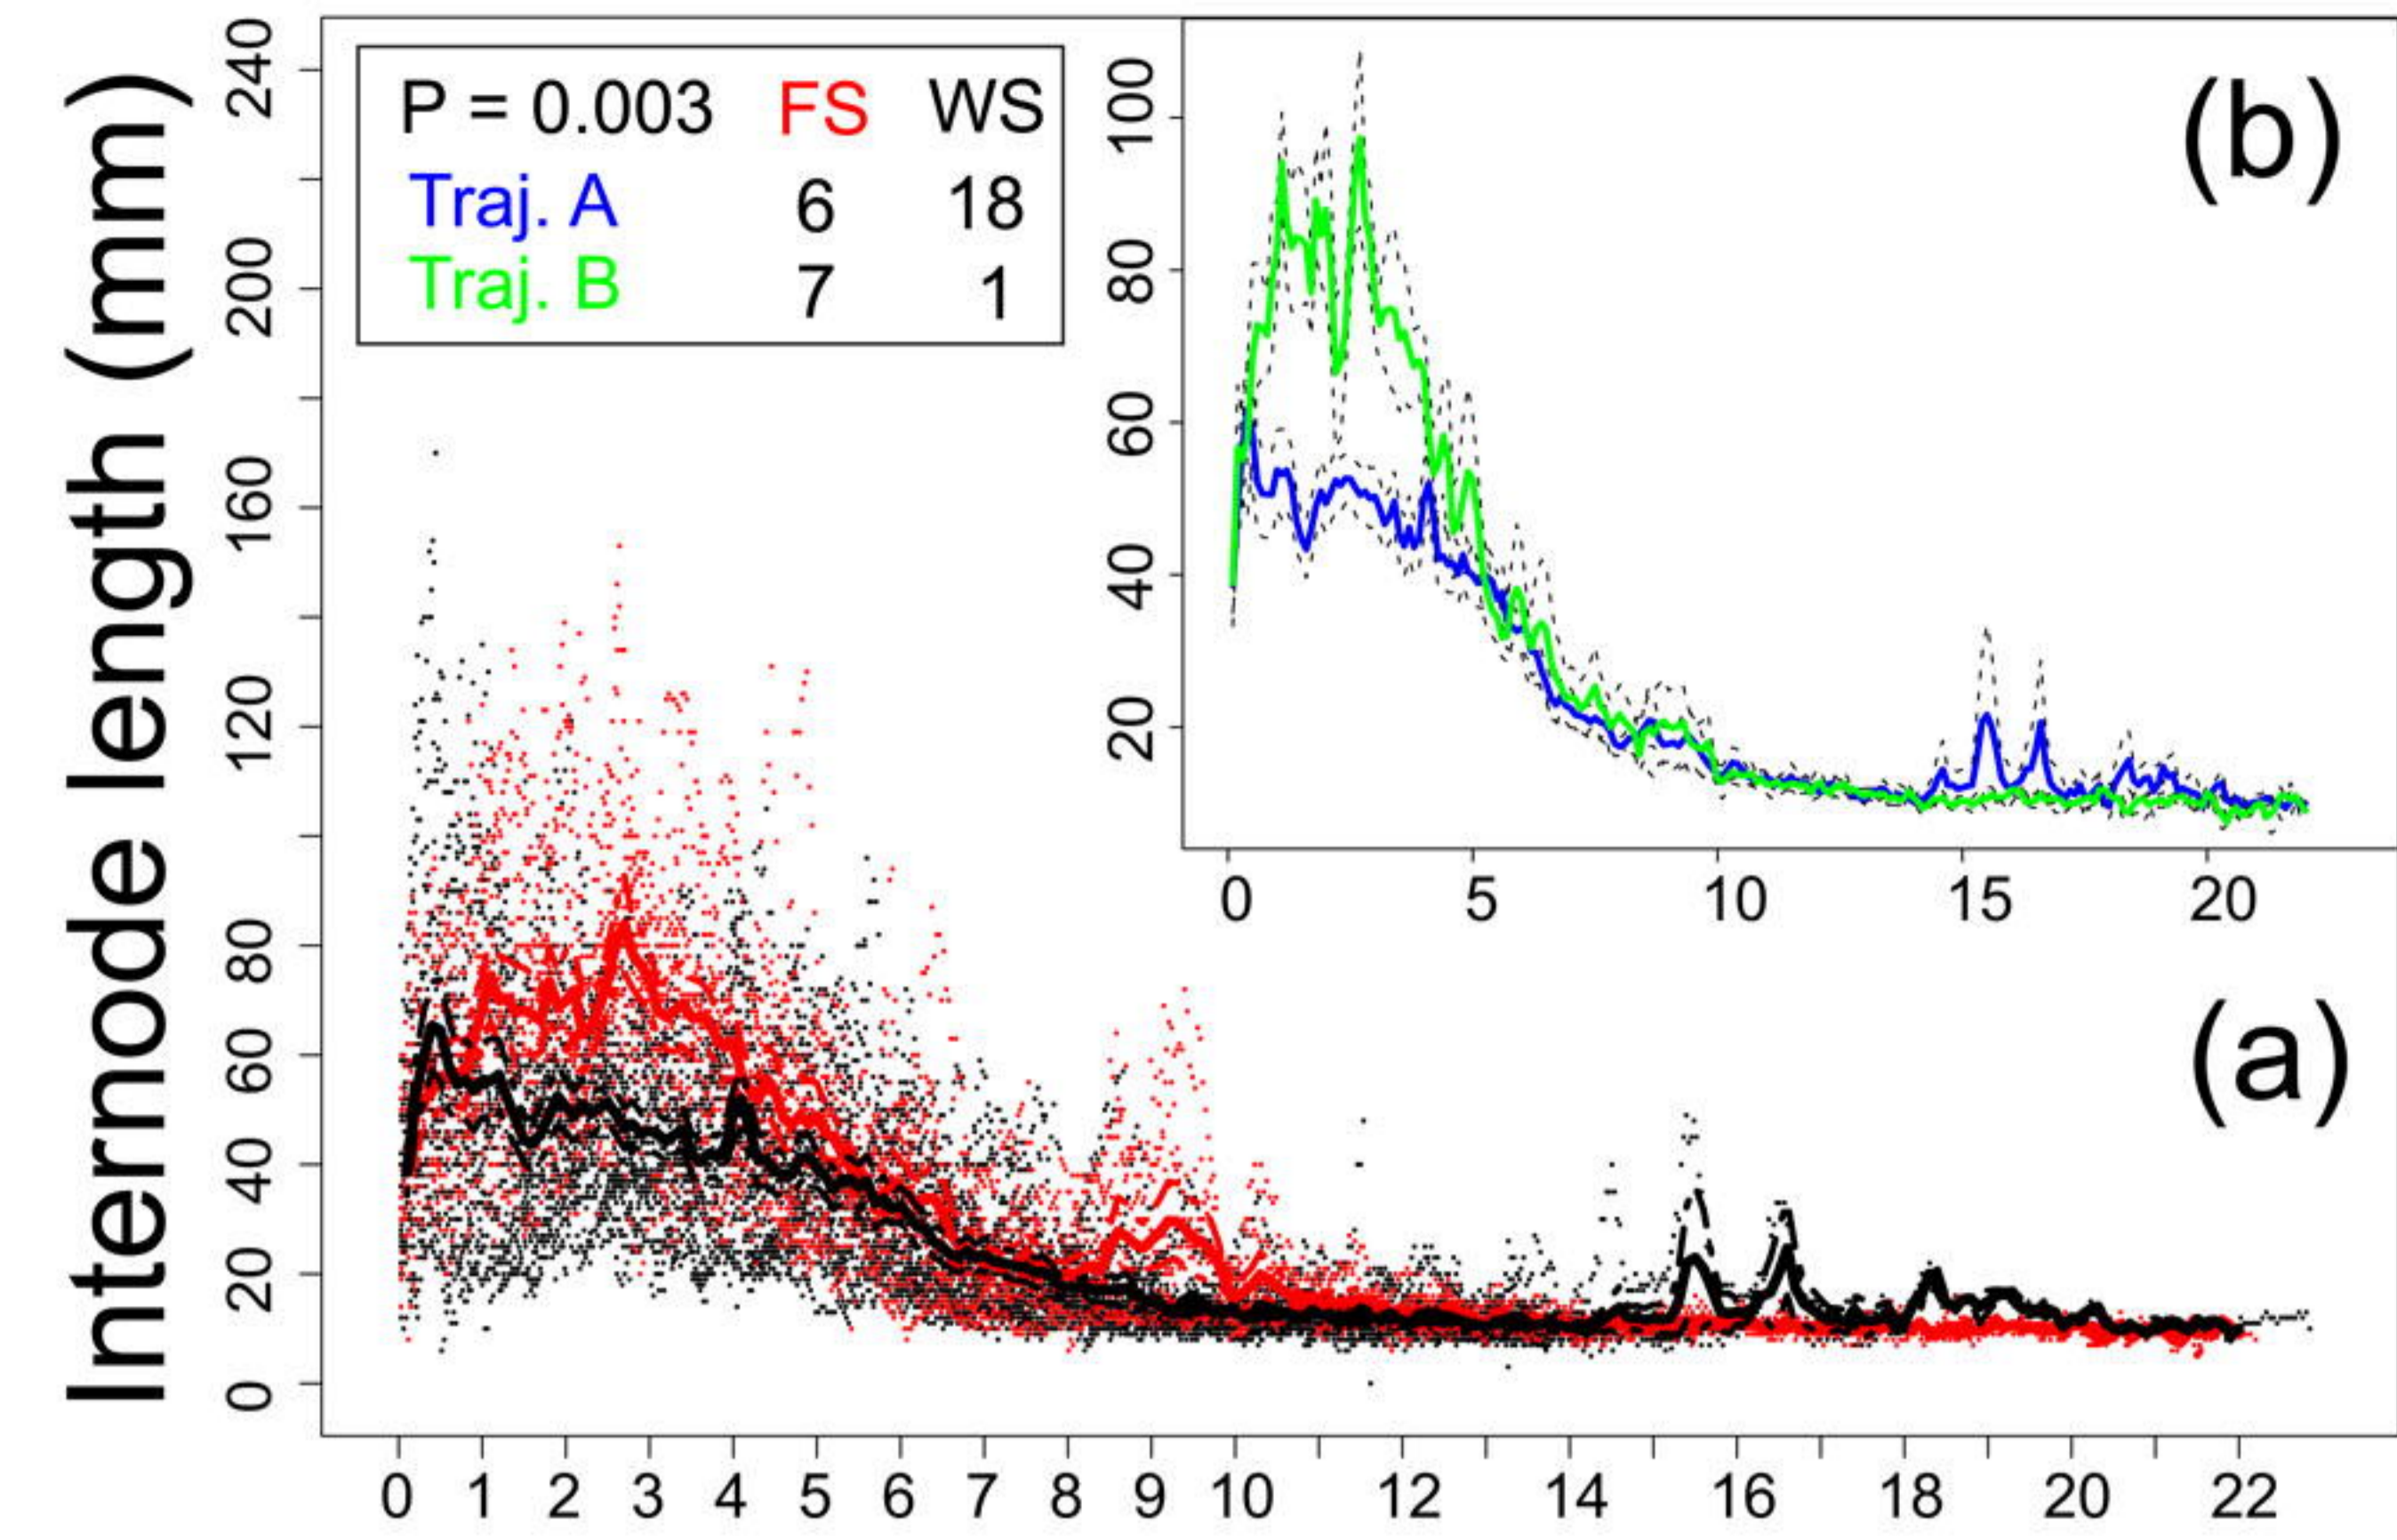

## Sparouine

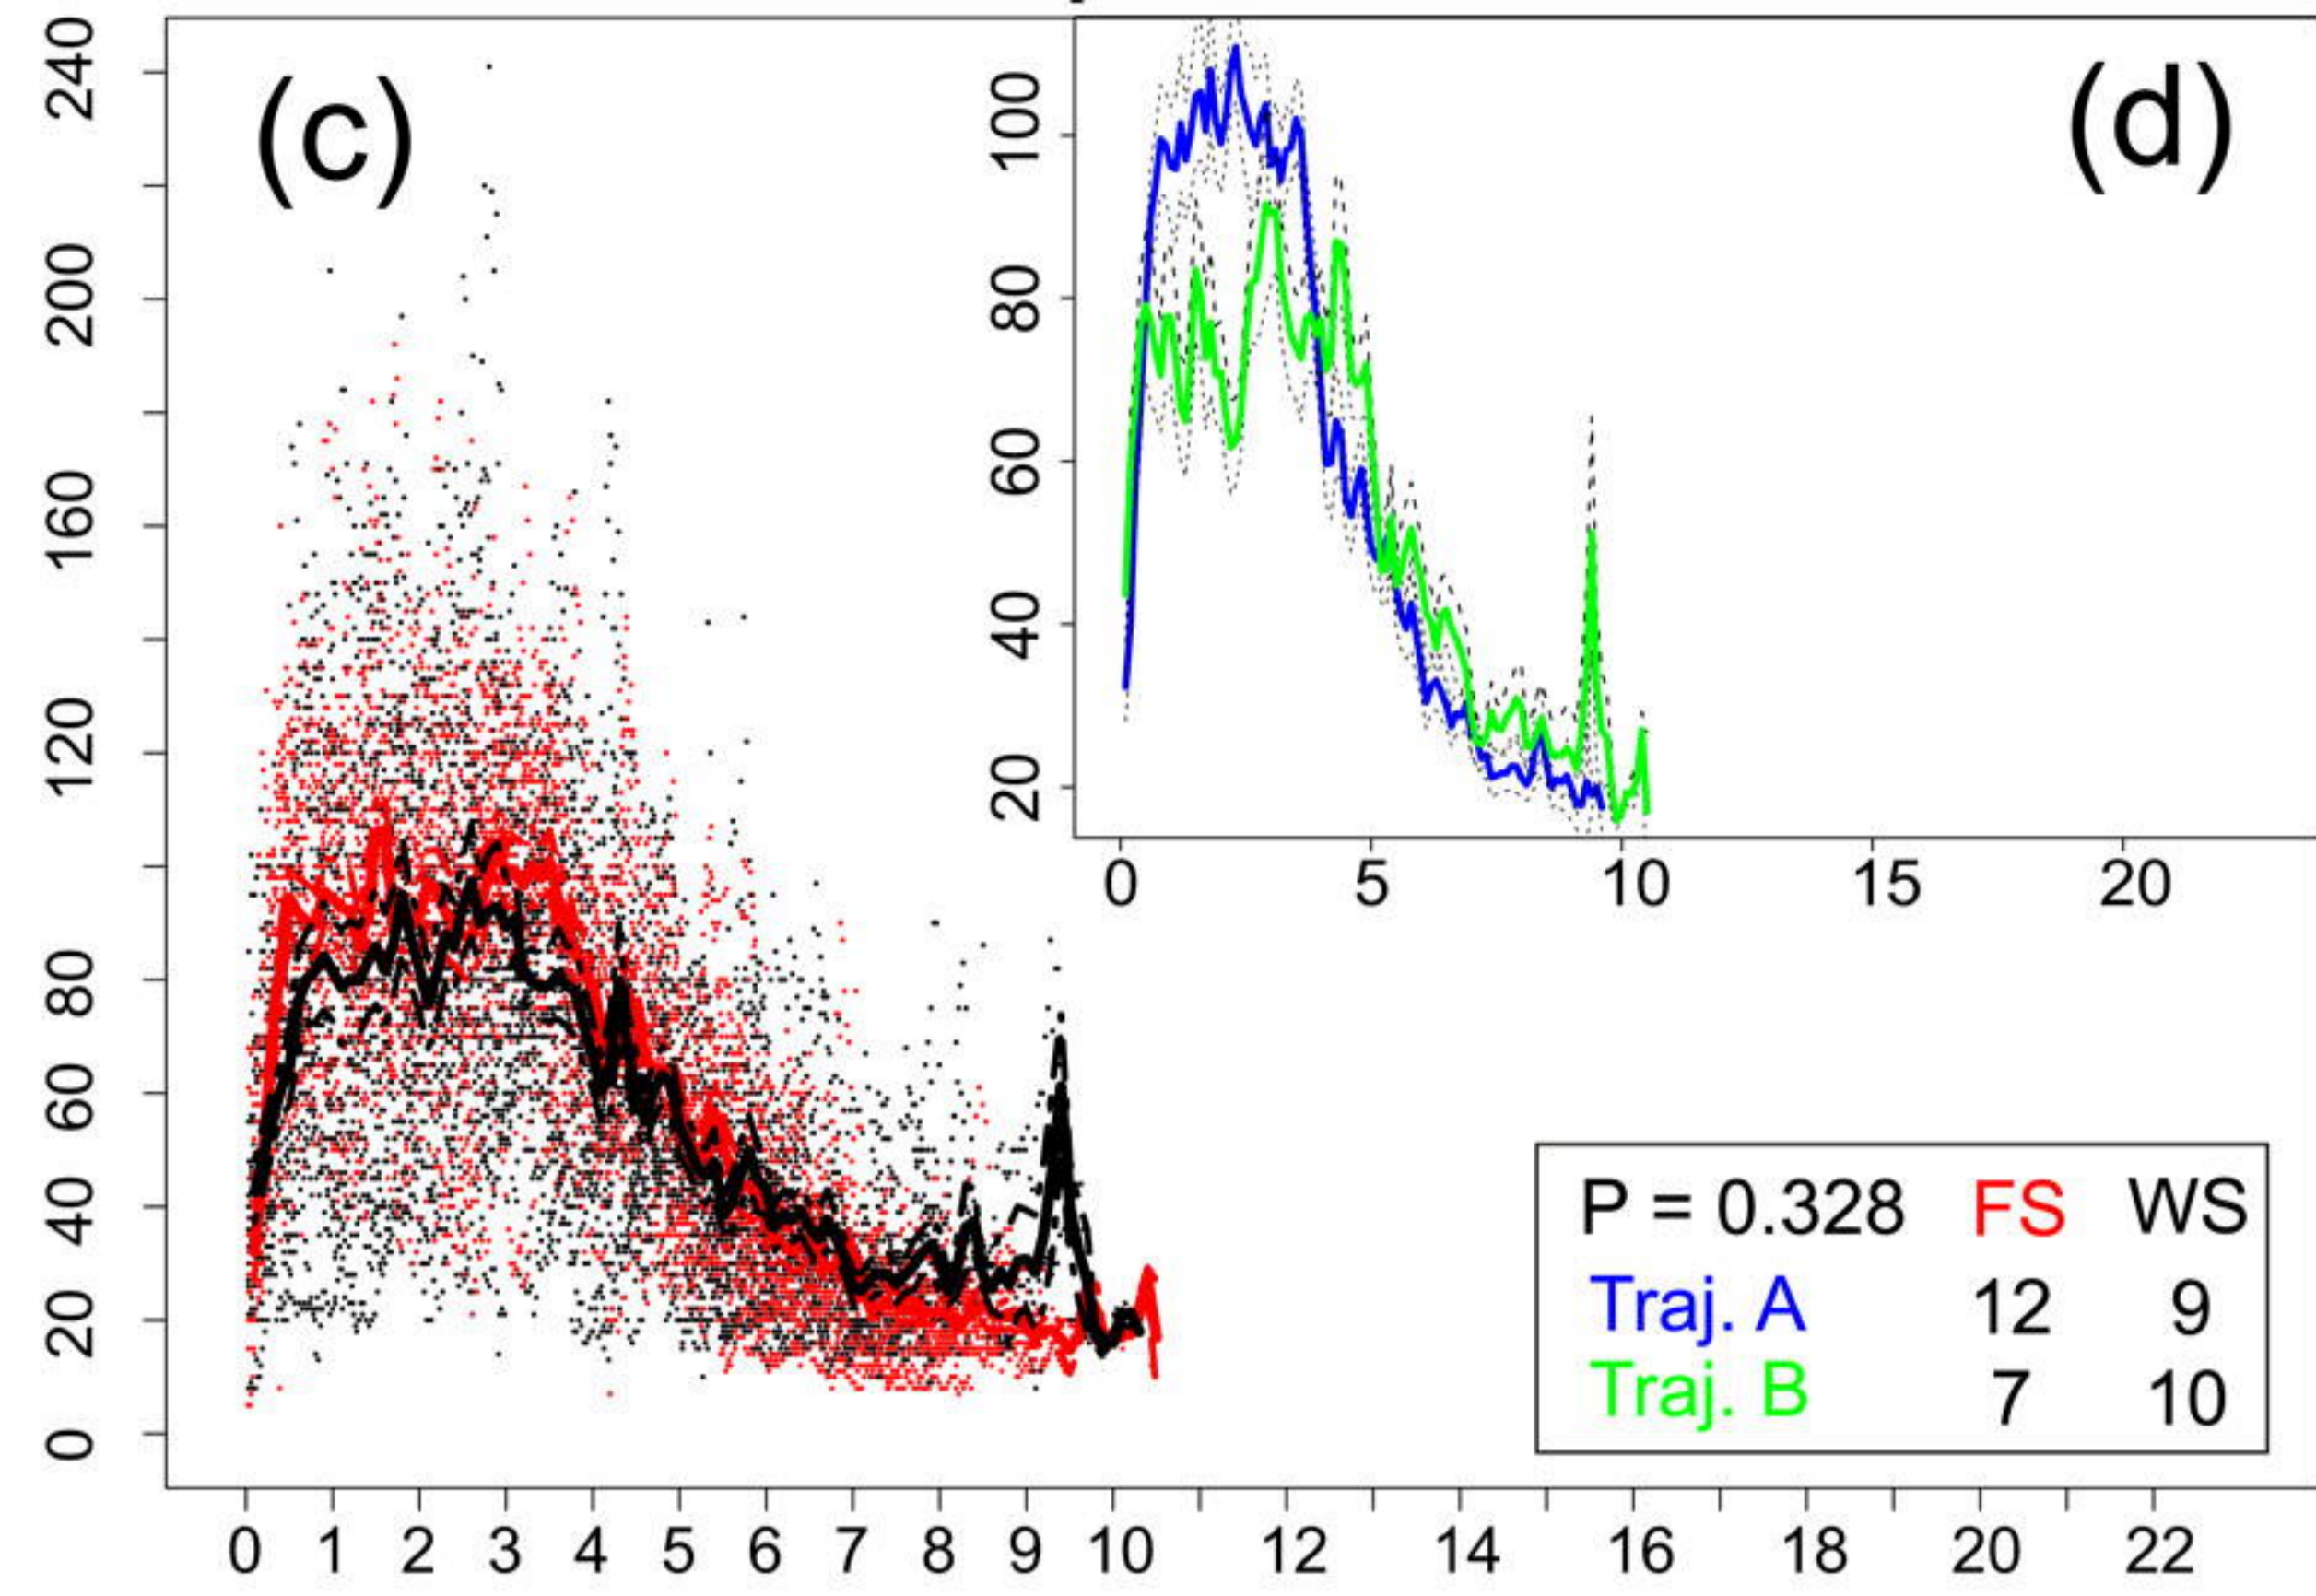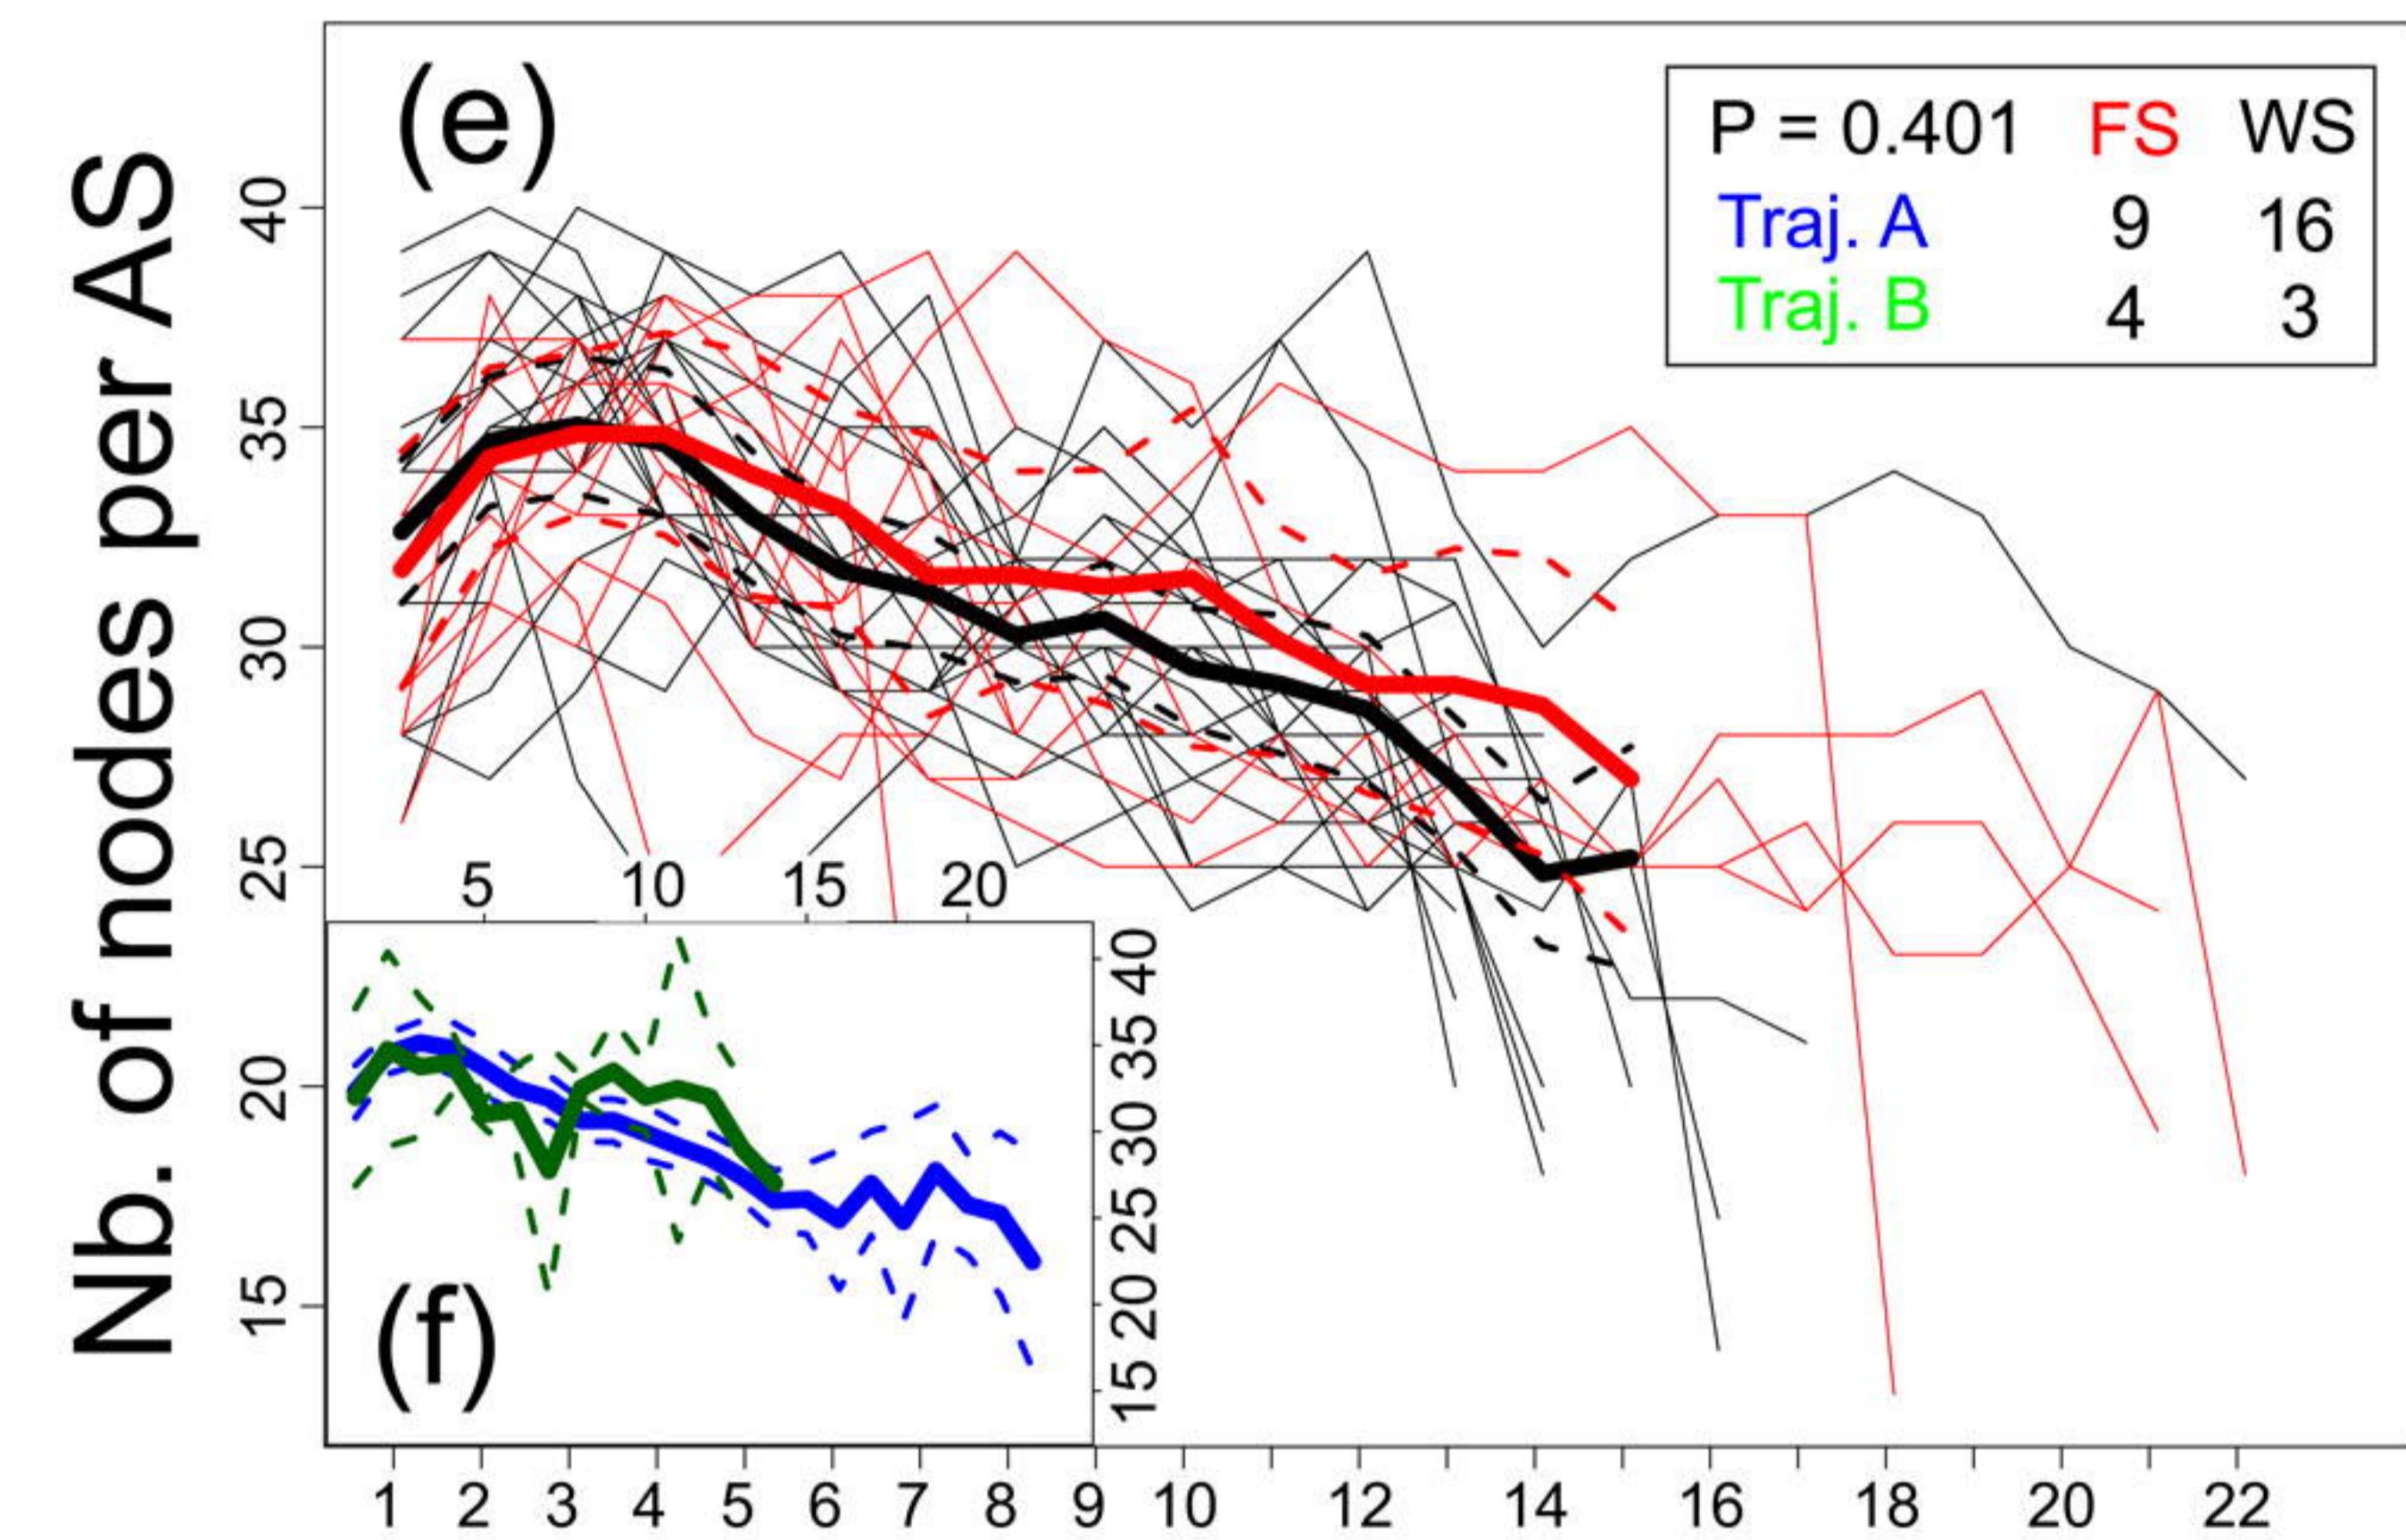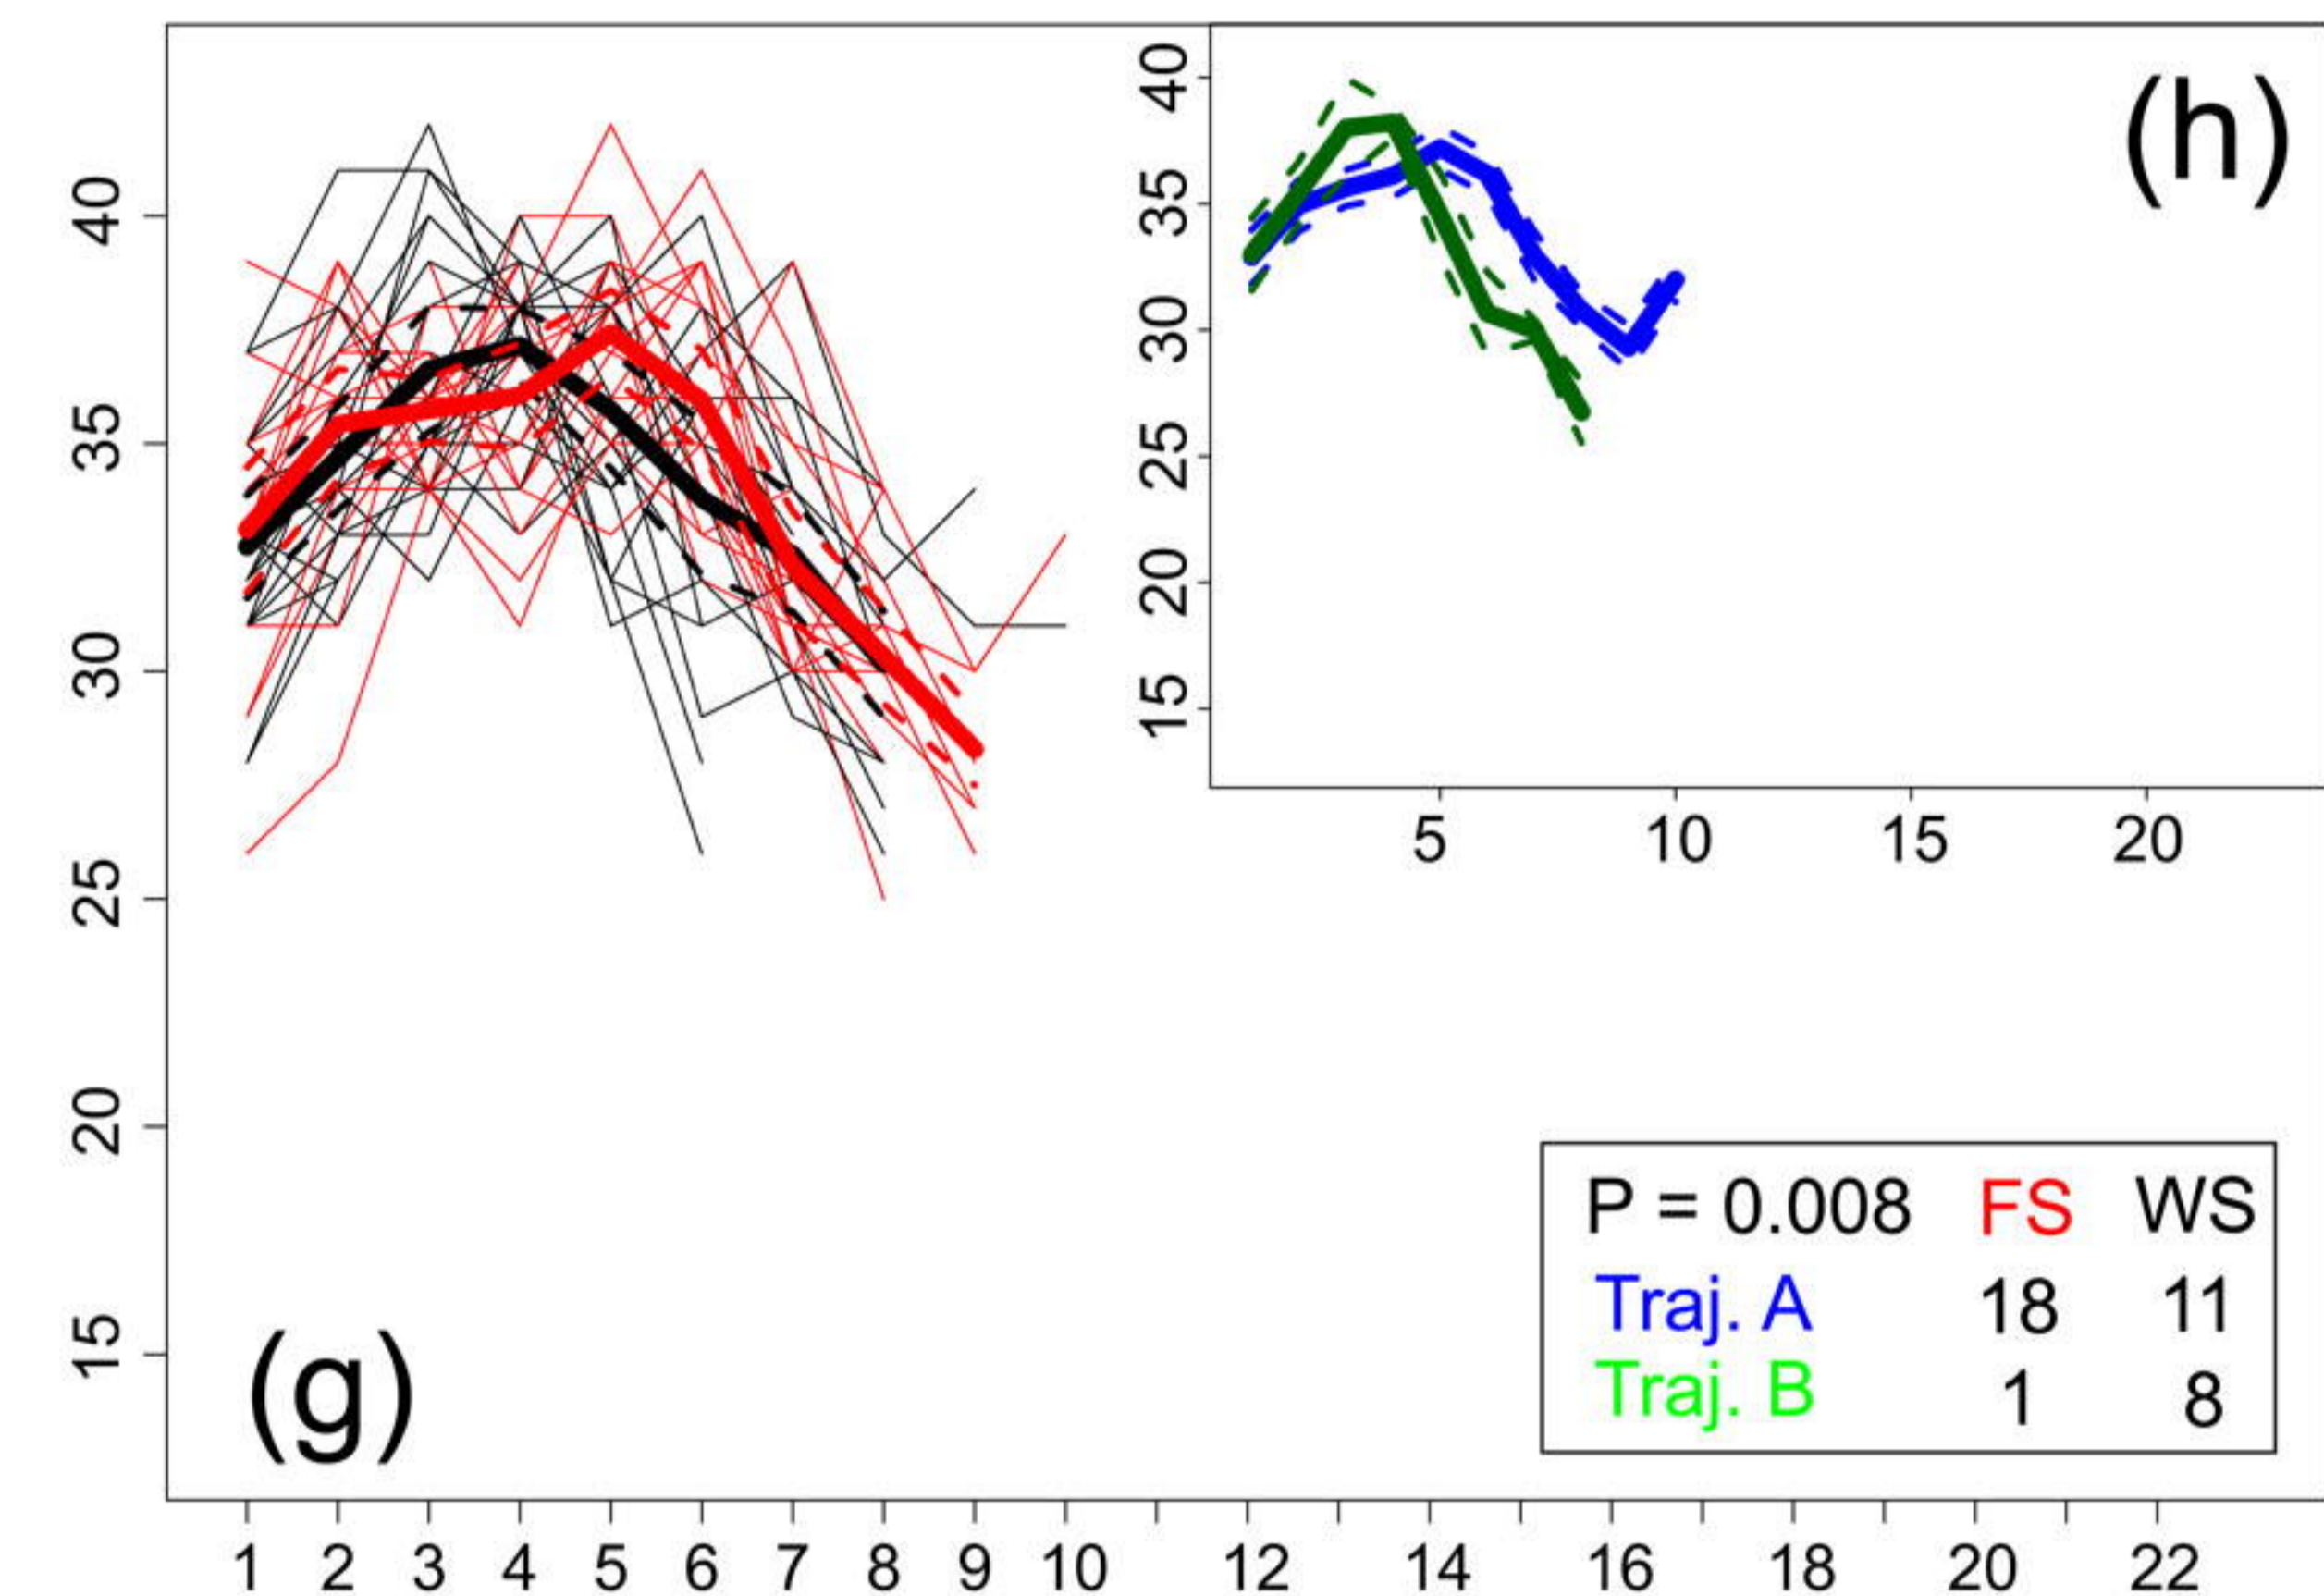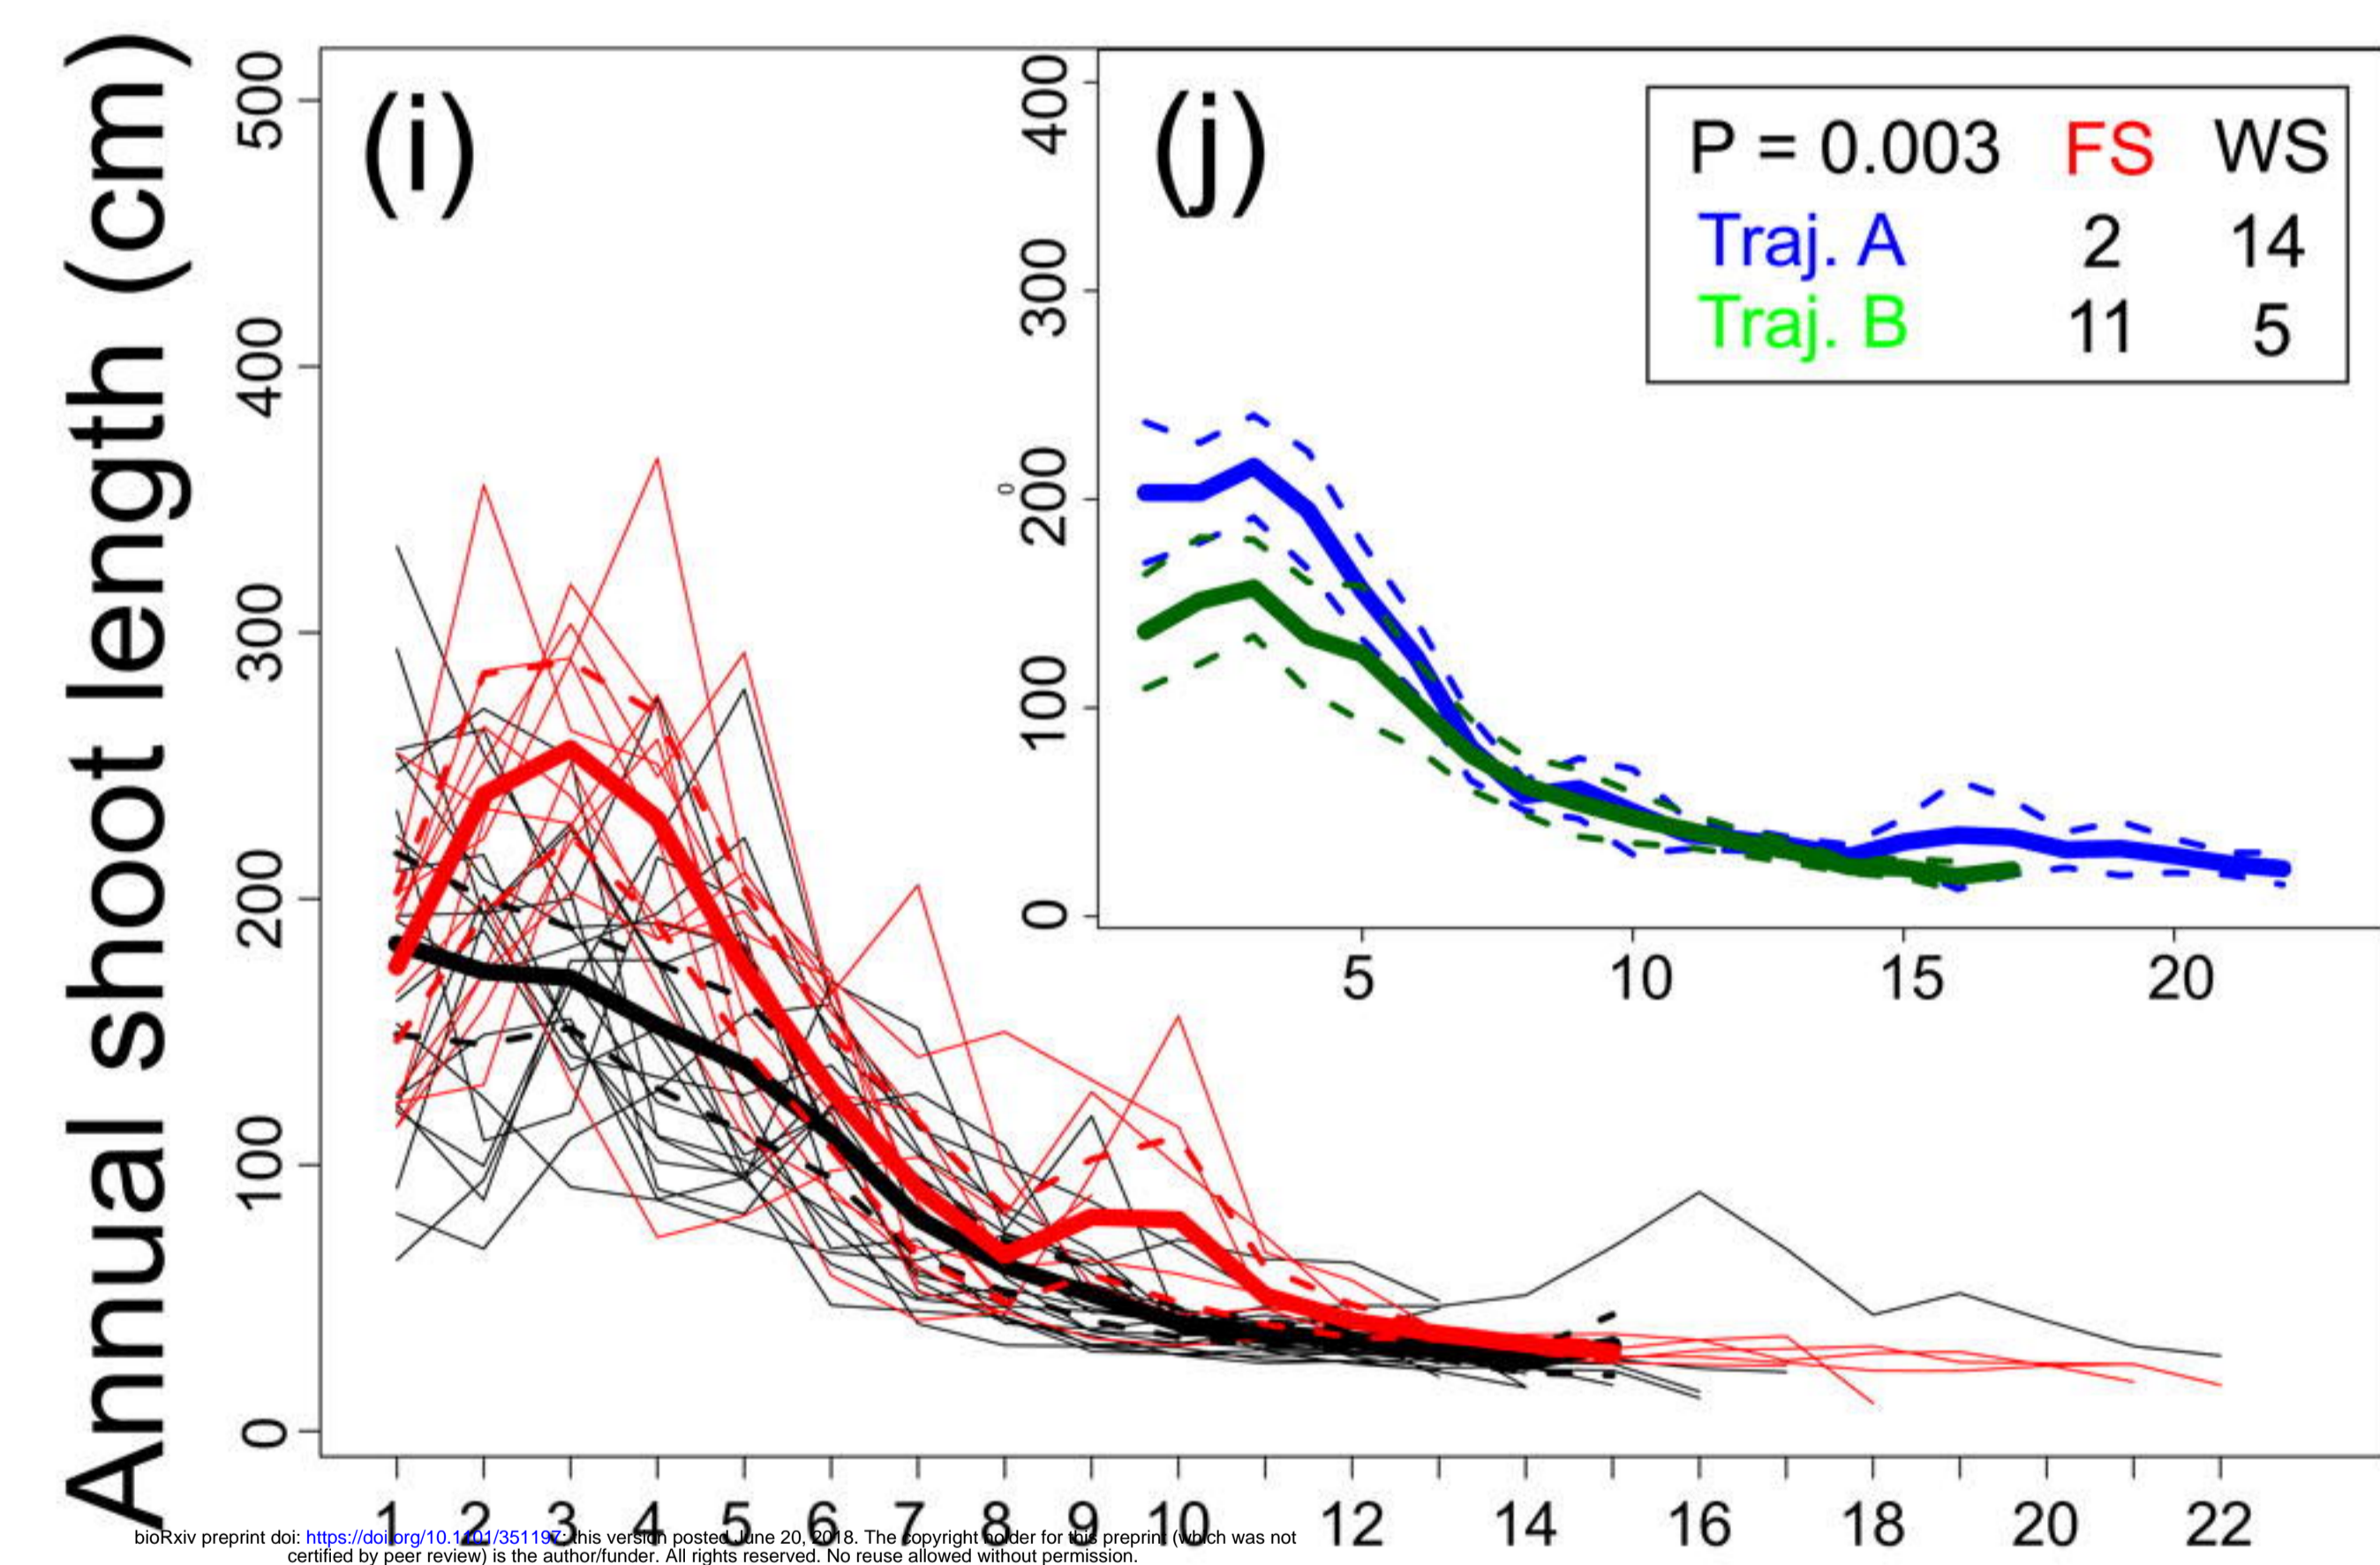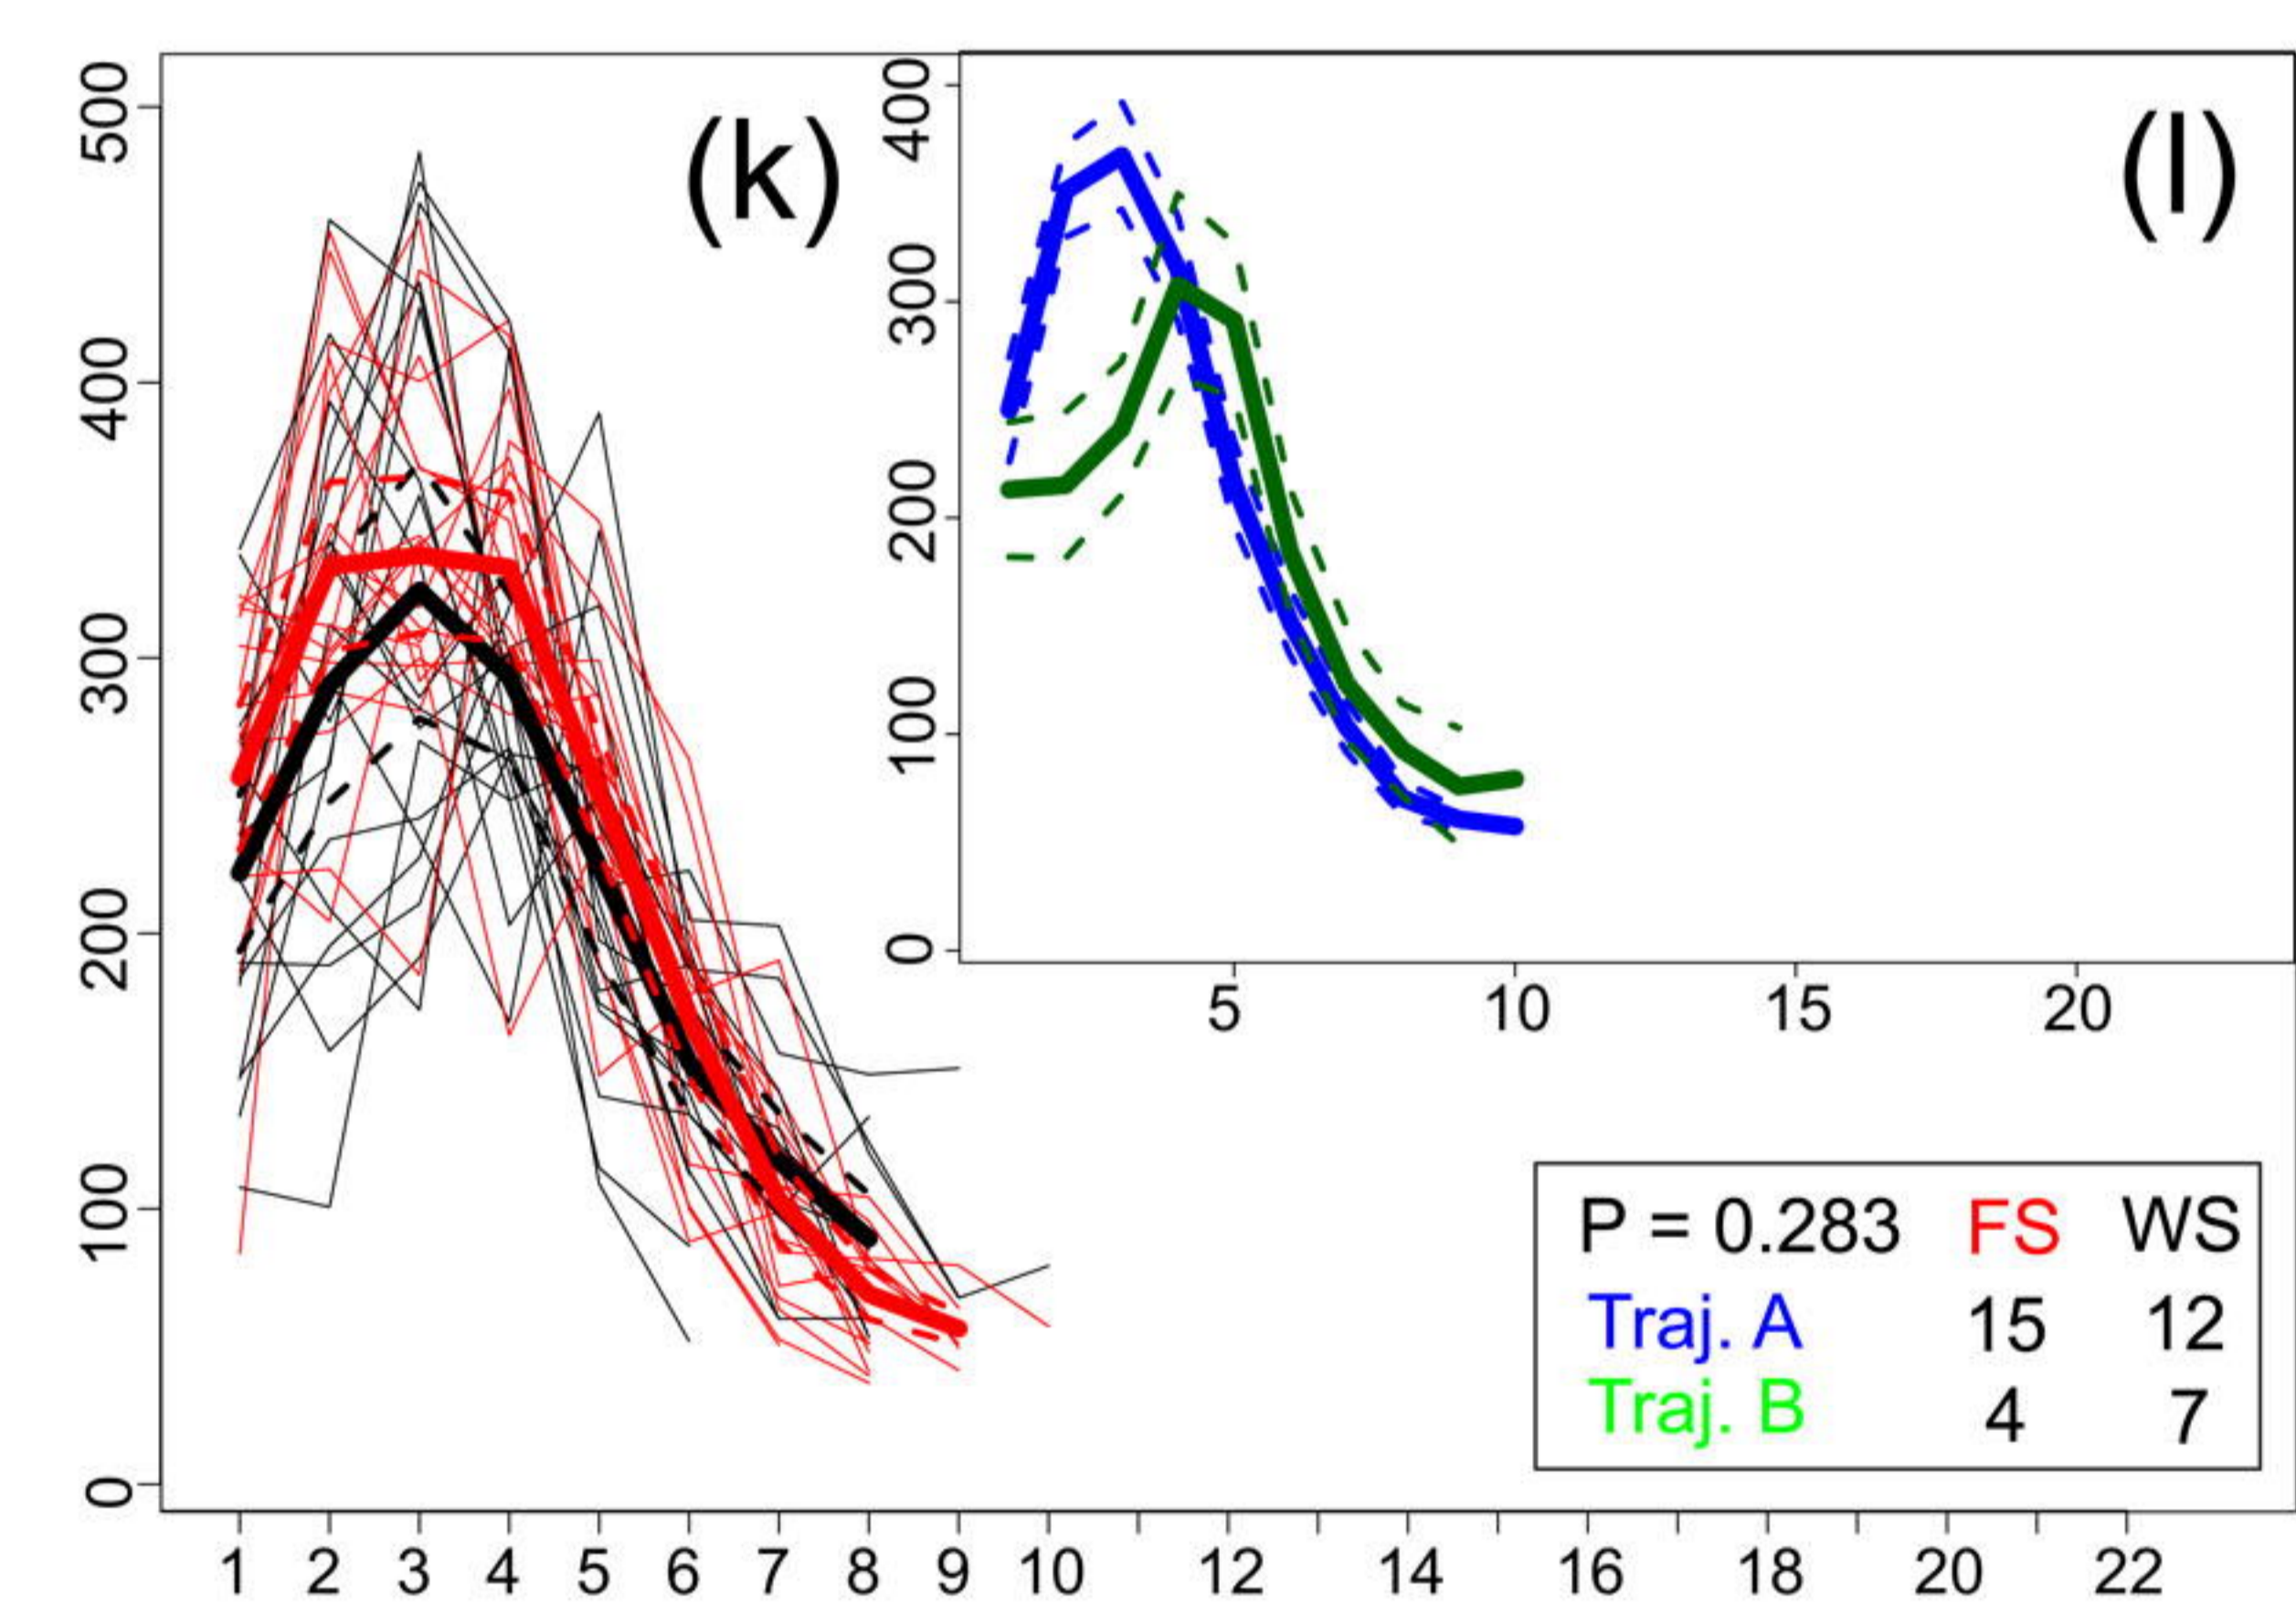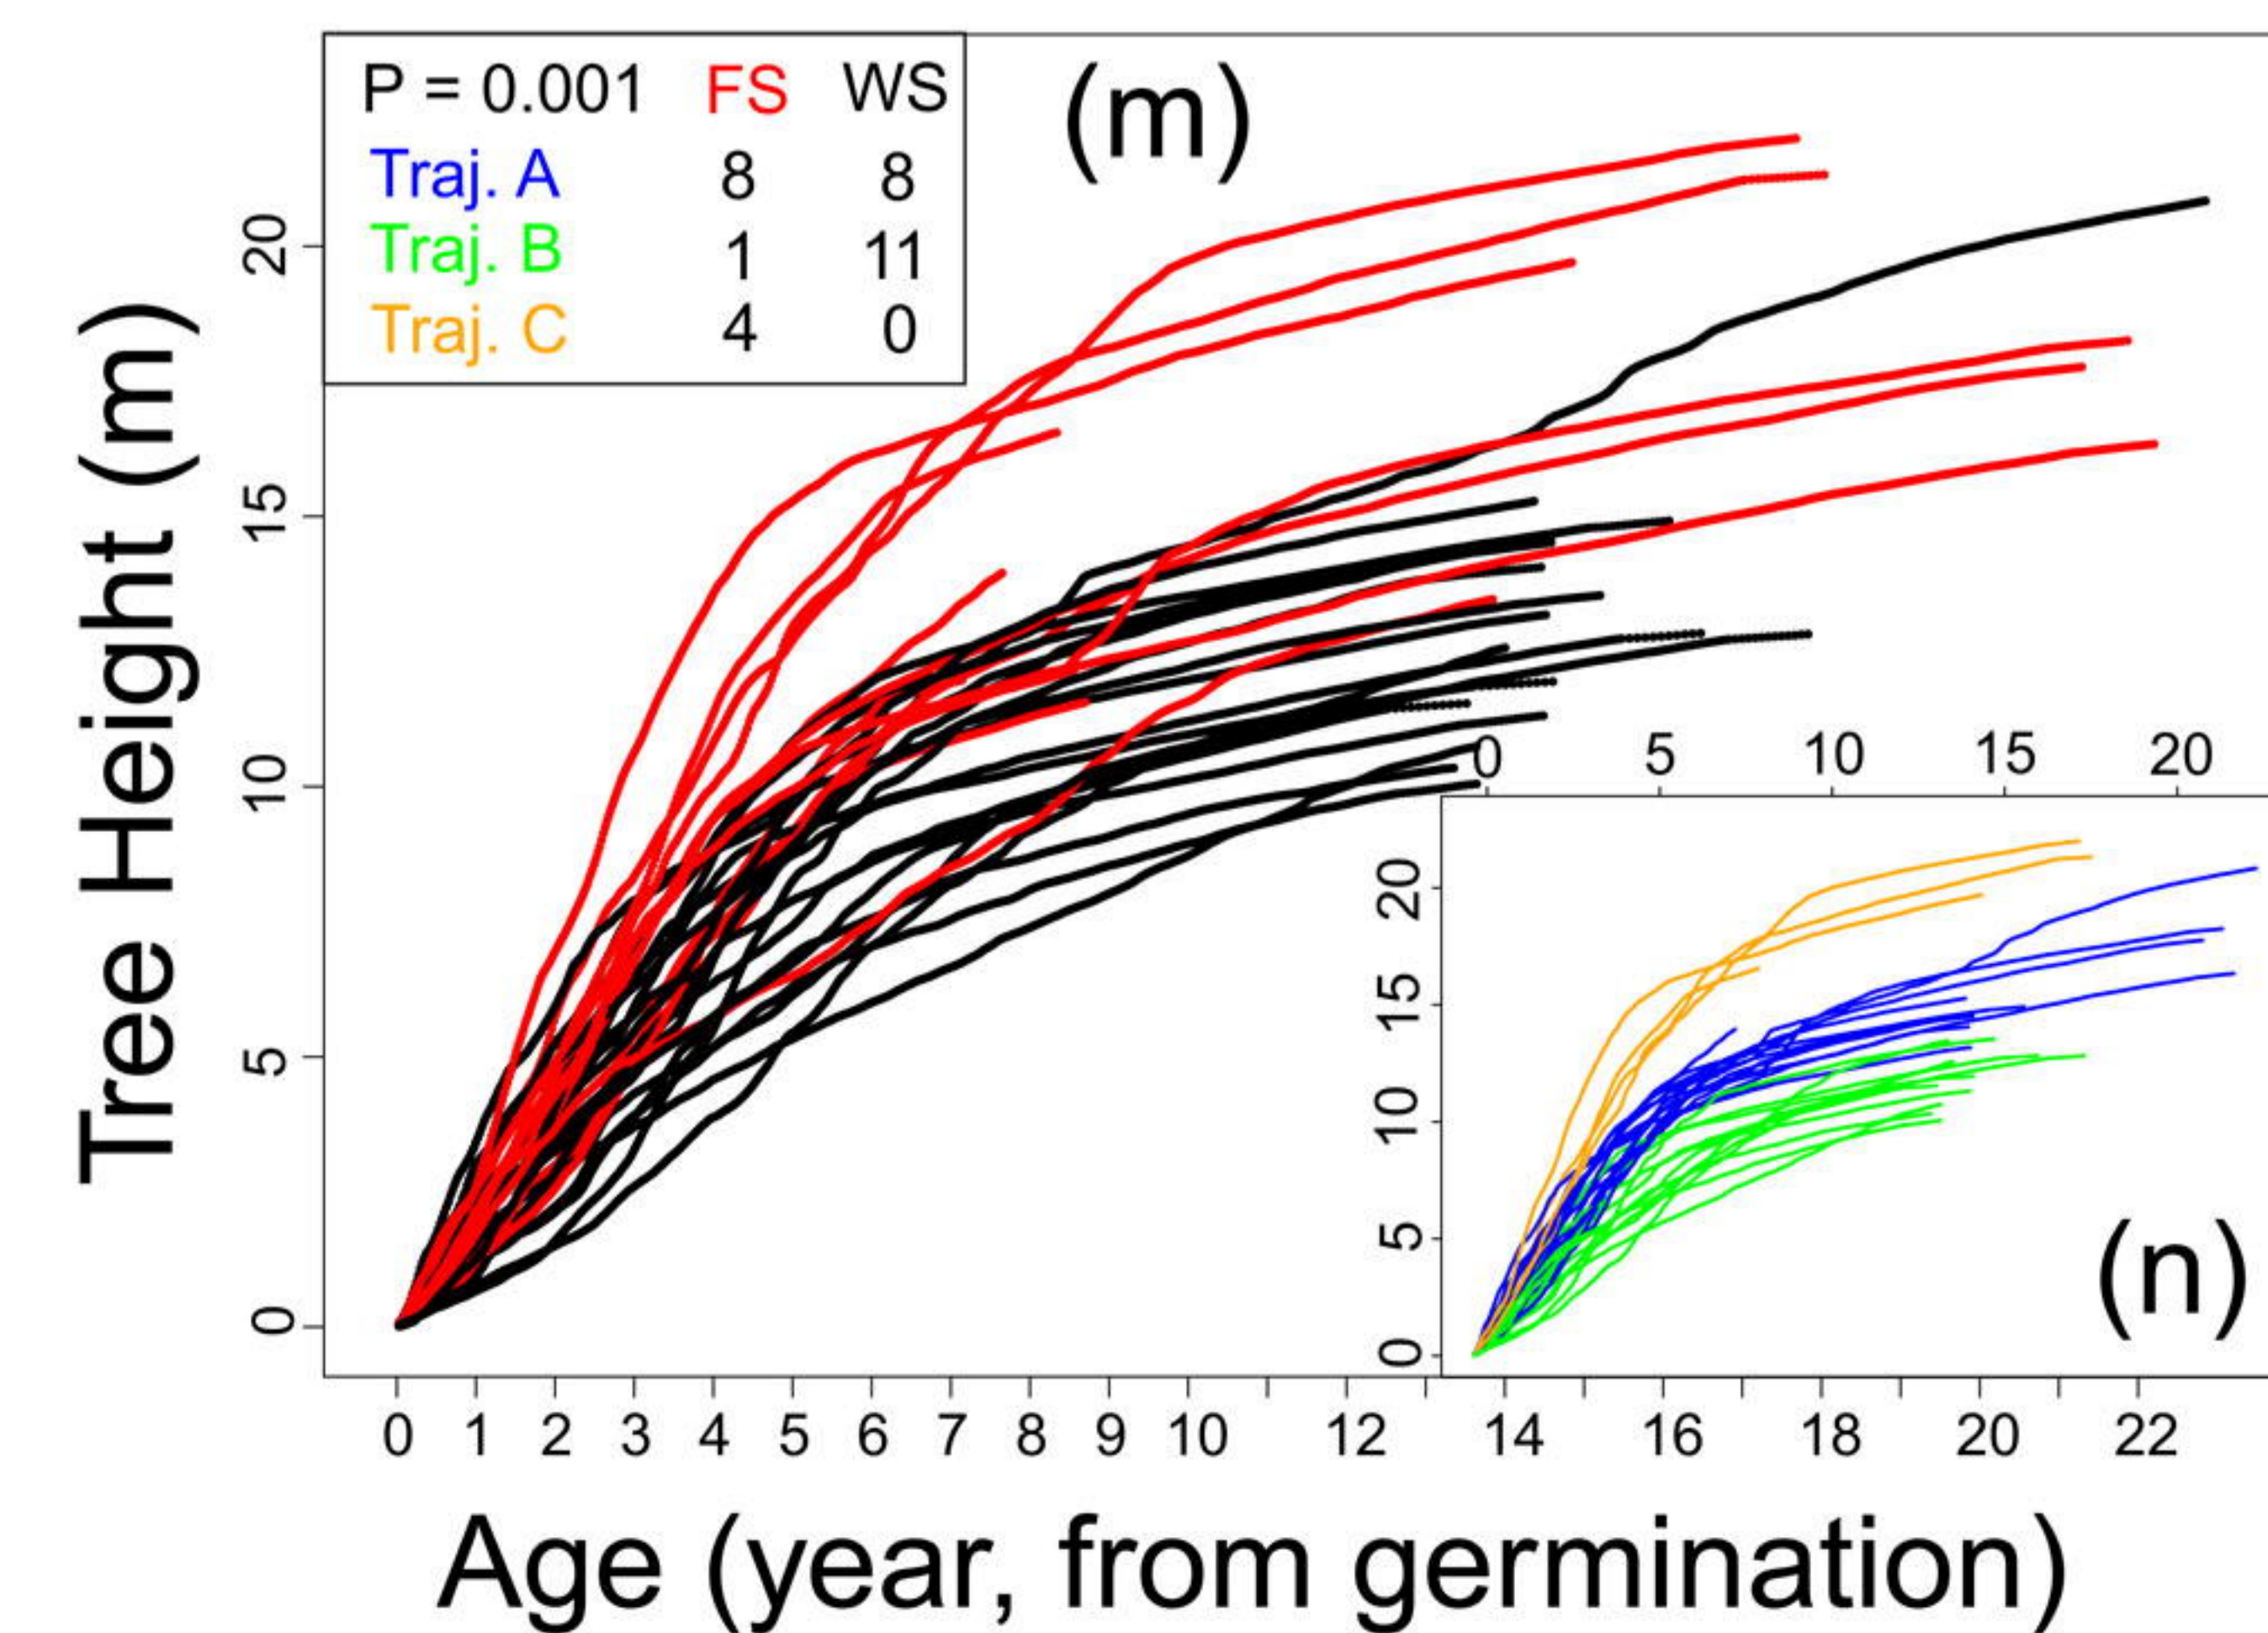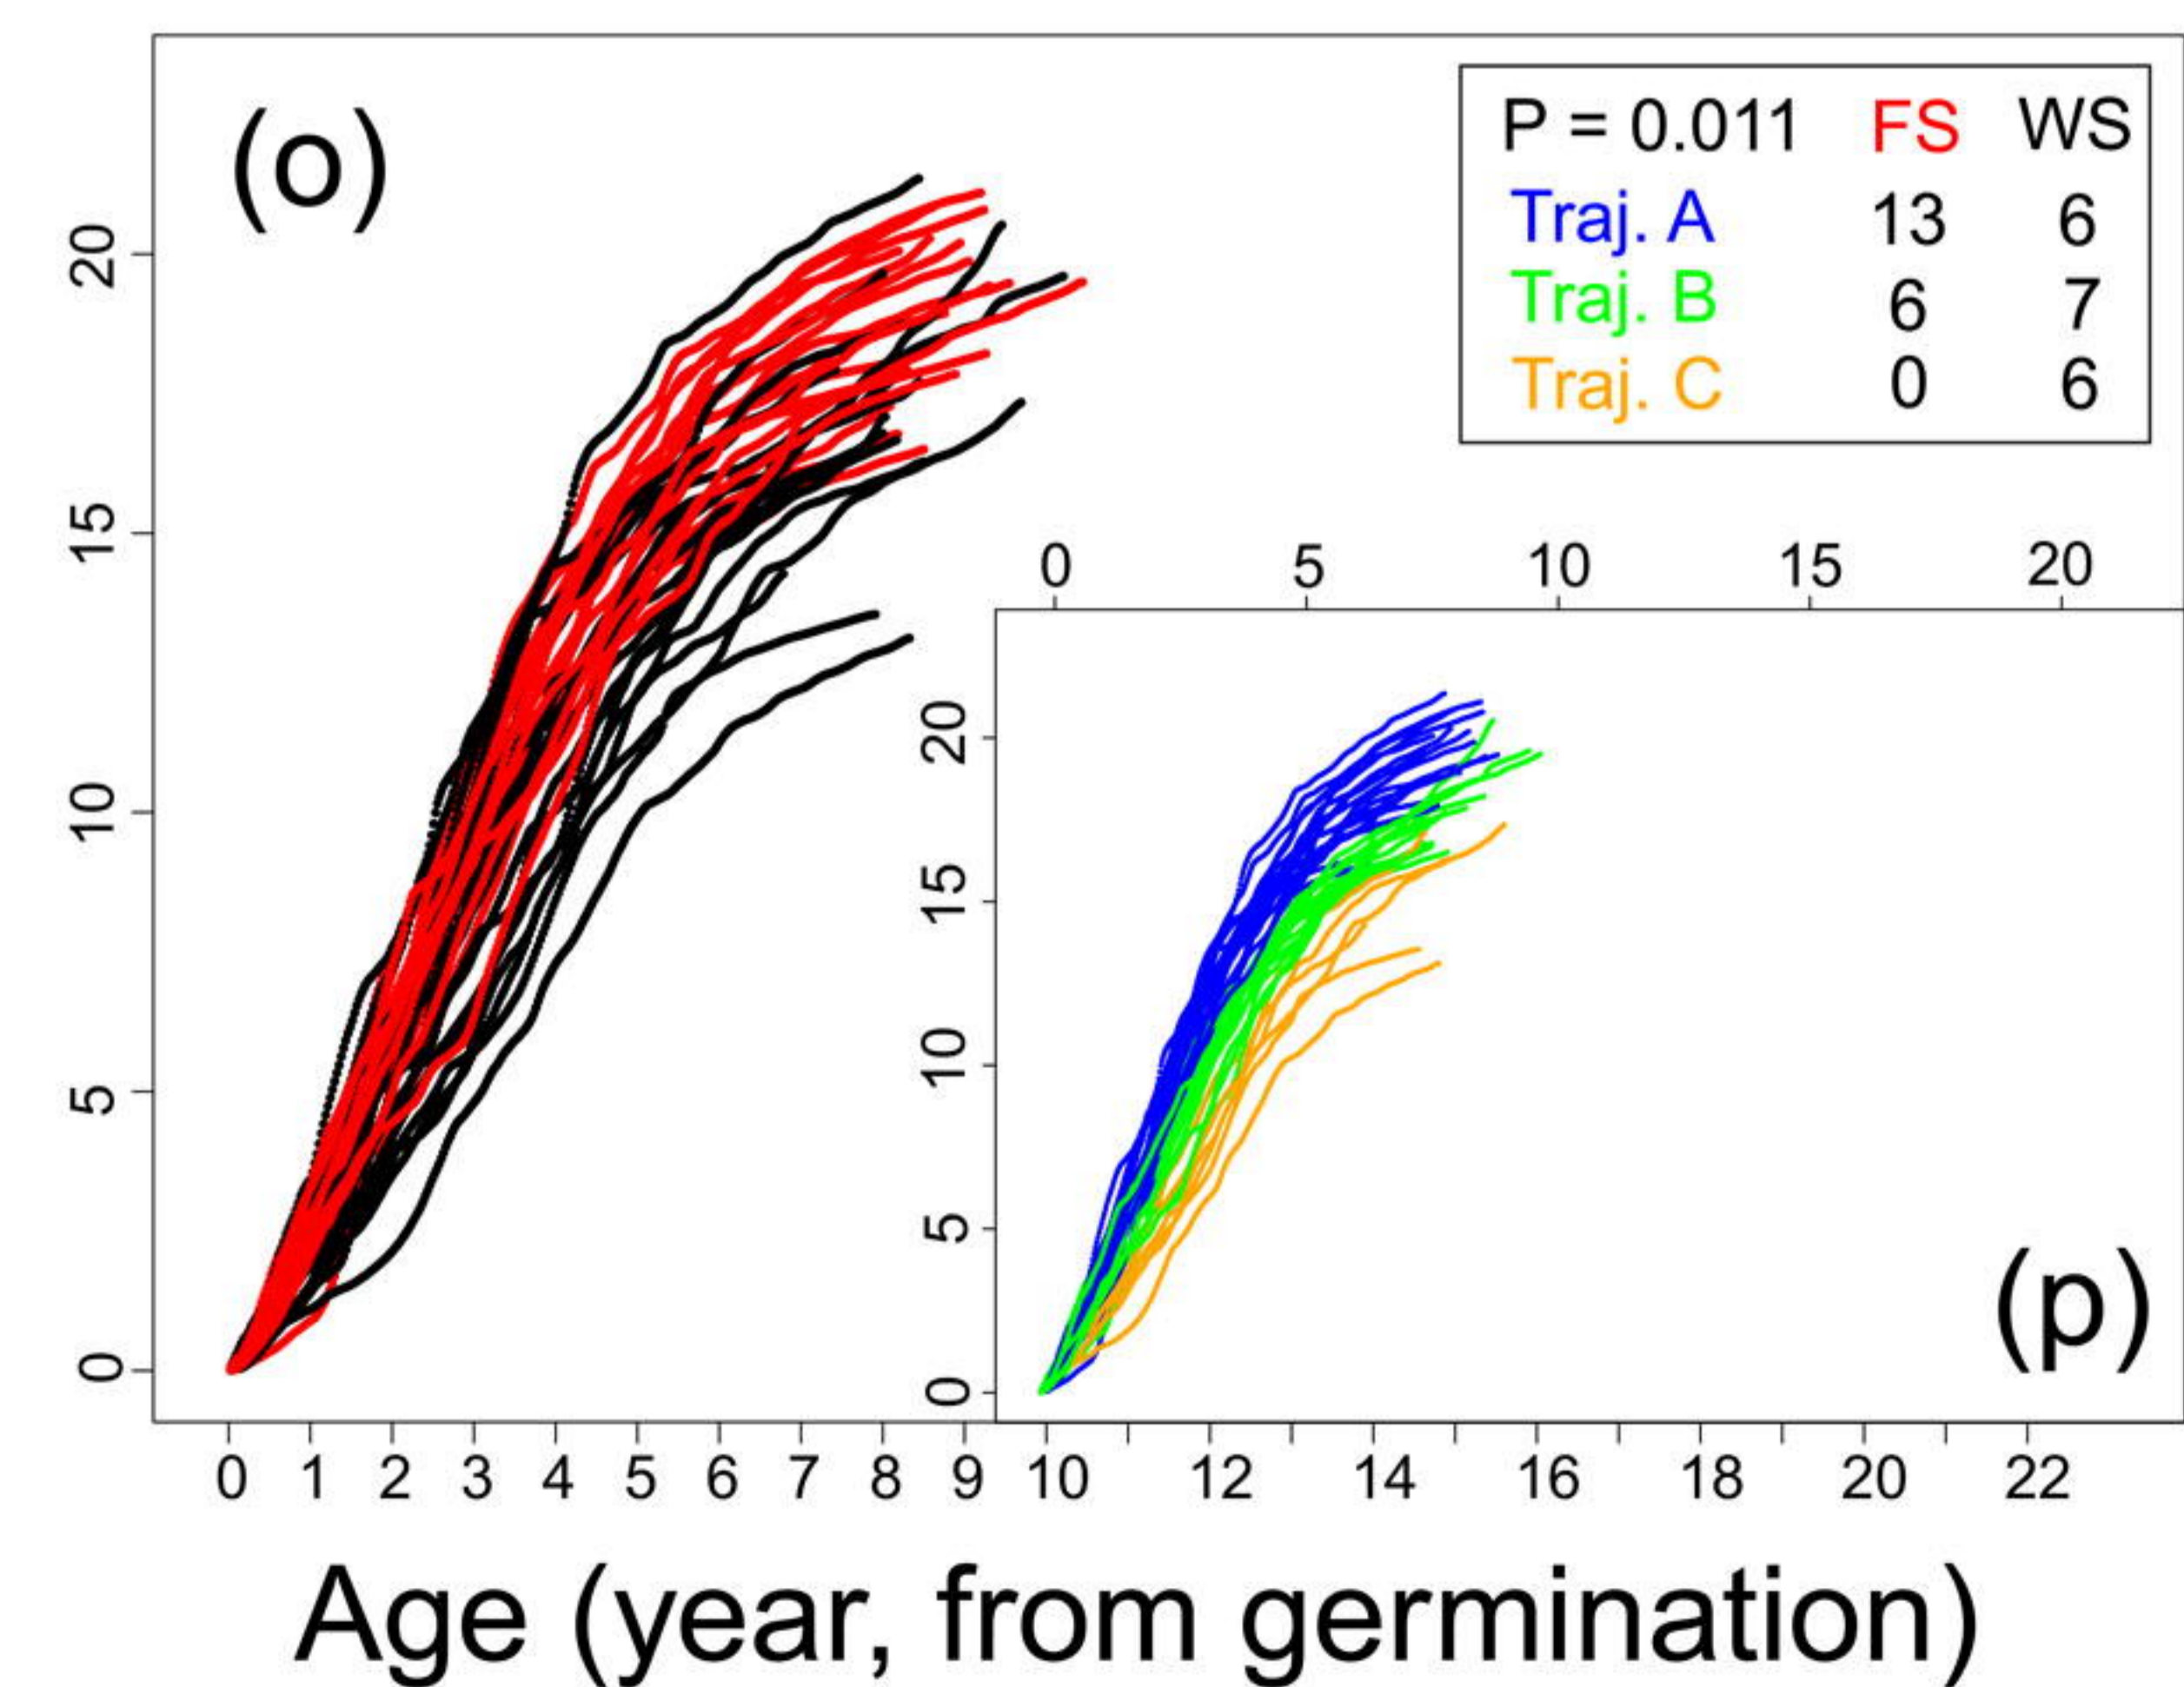

# Counami

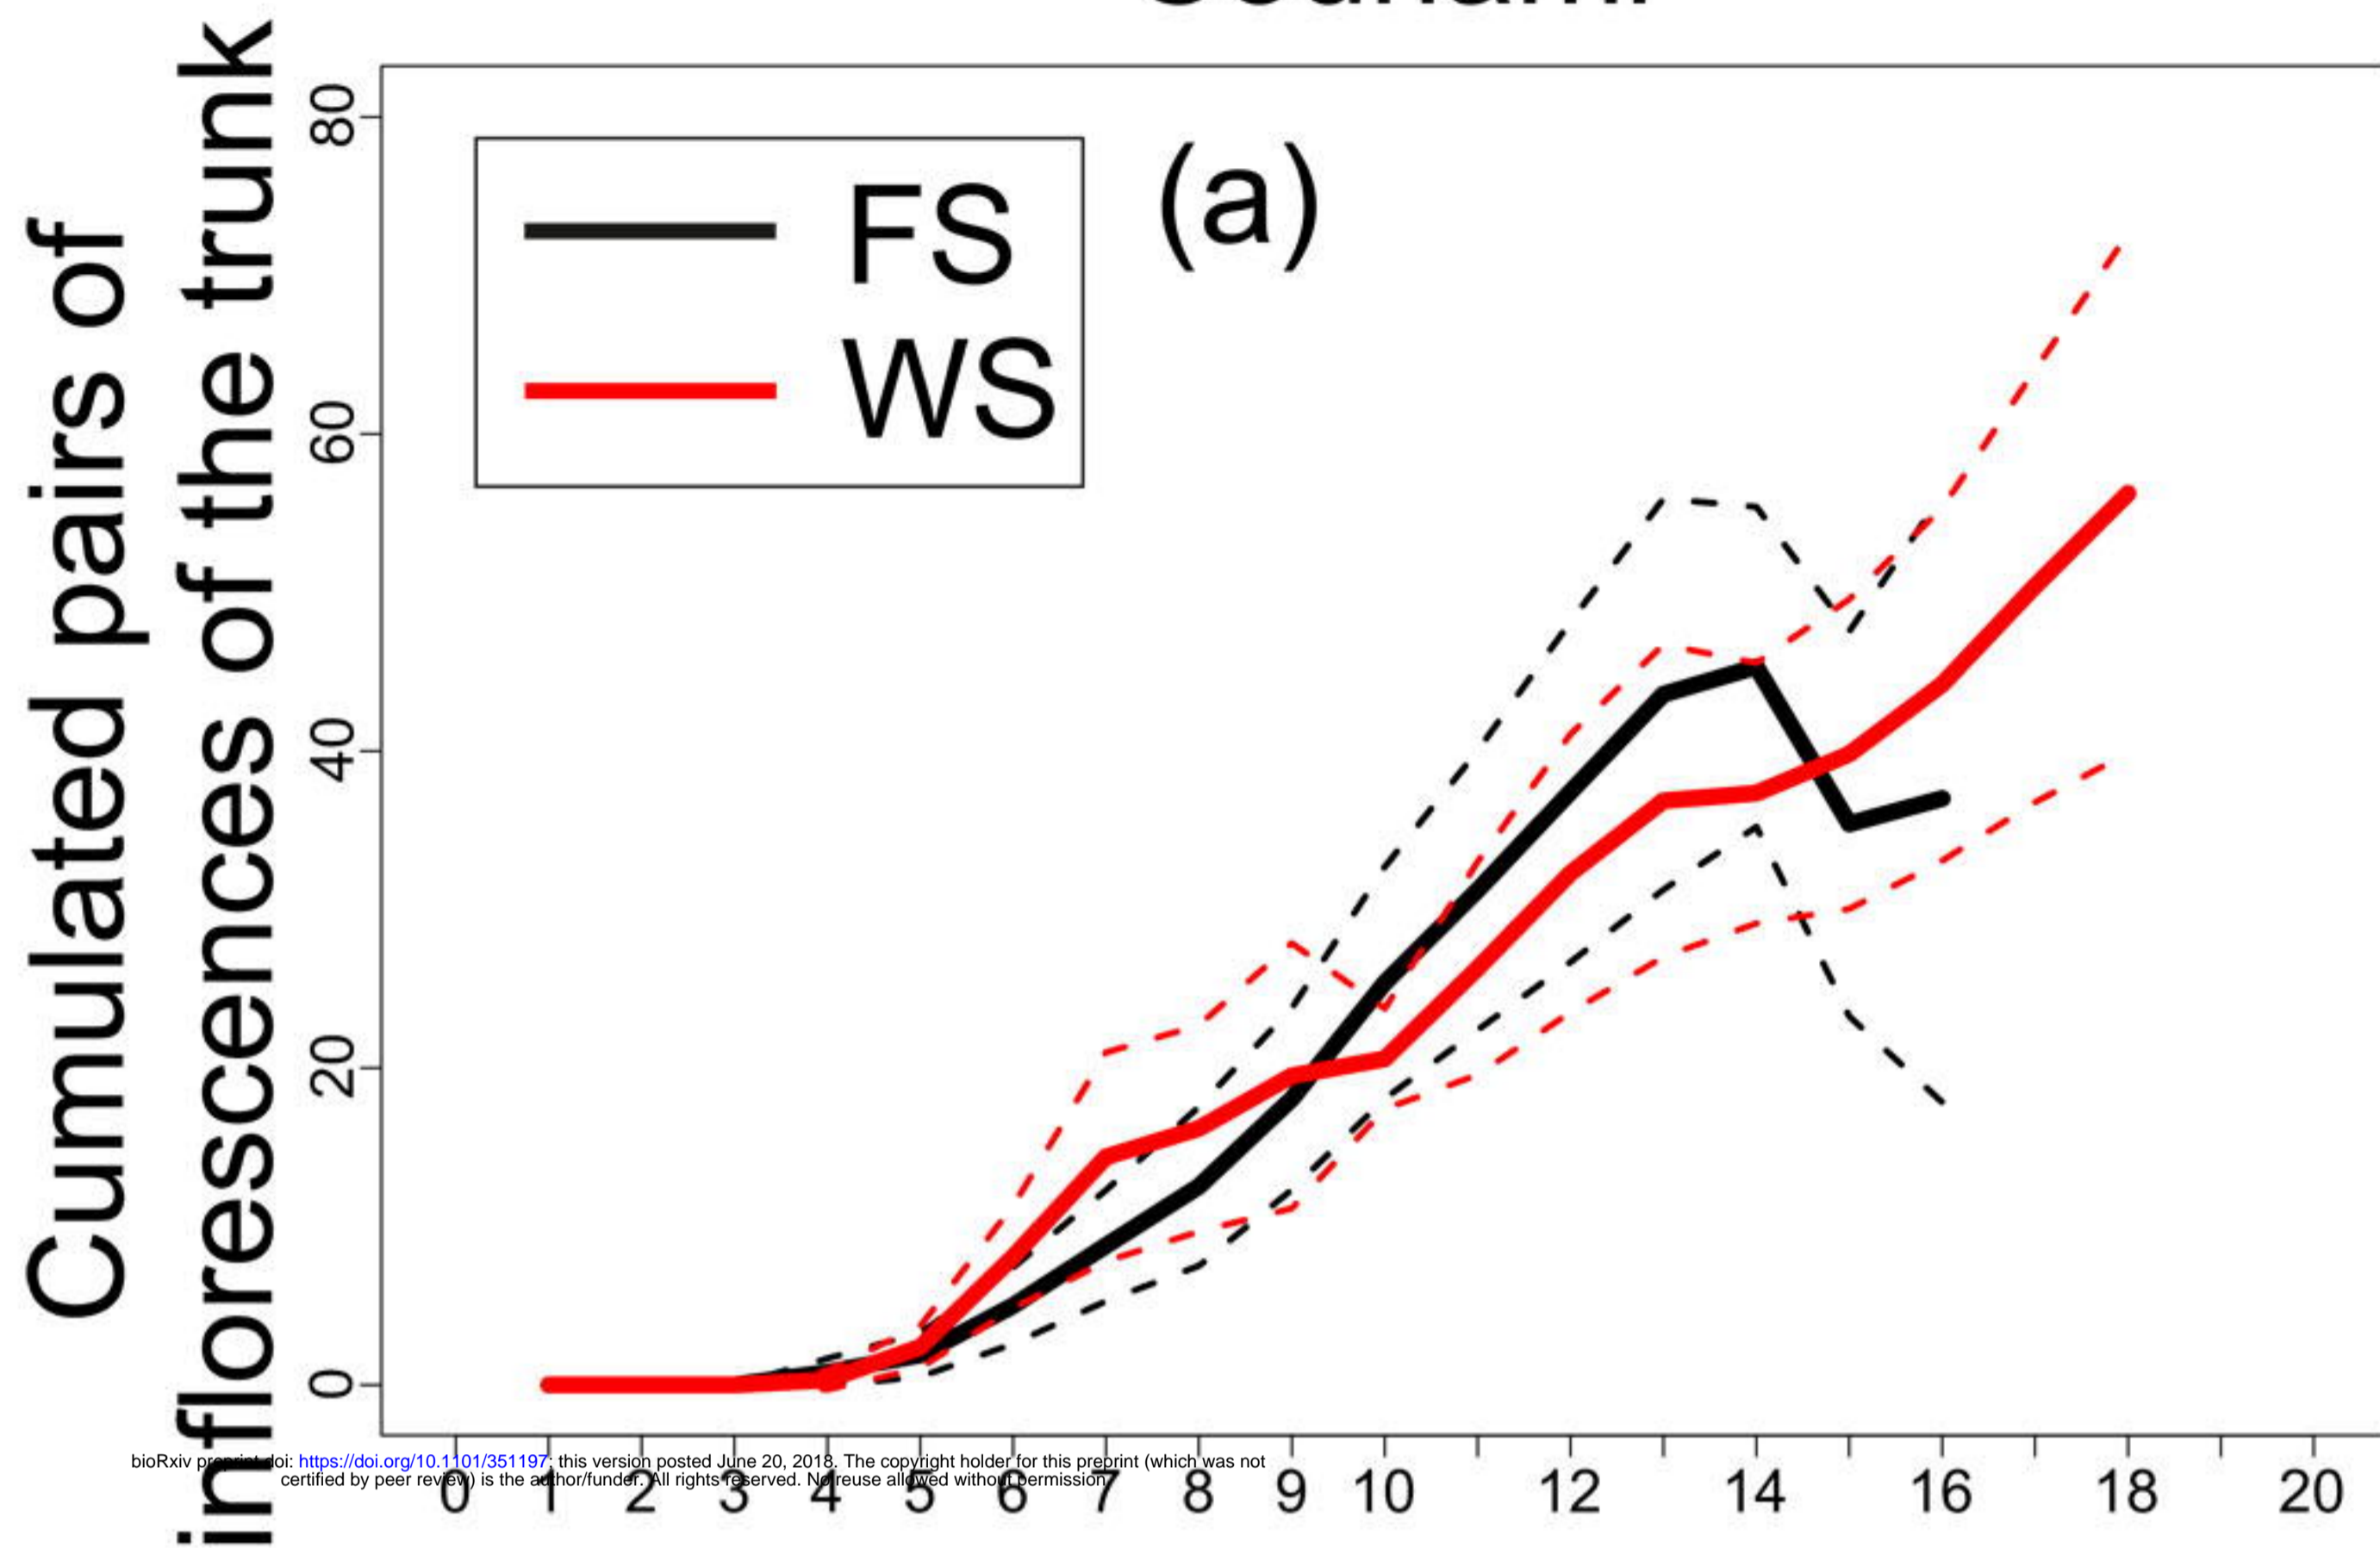

# Sparouine

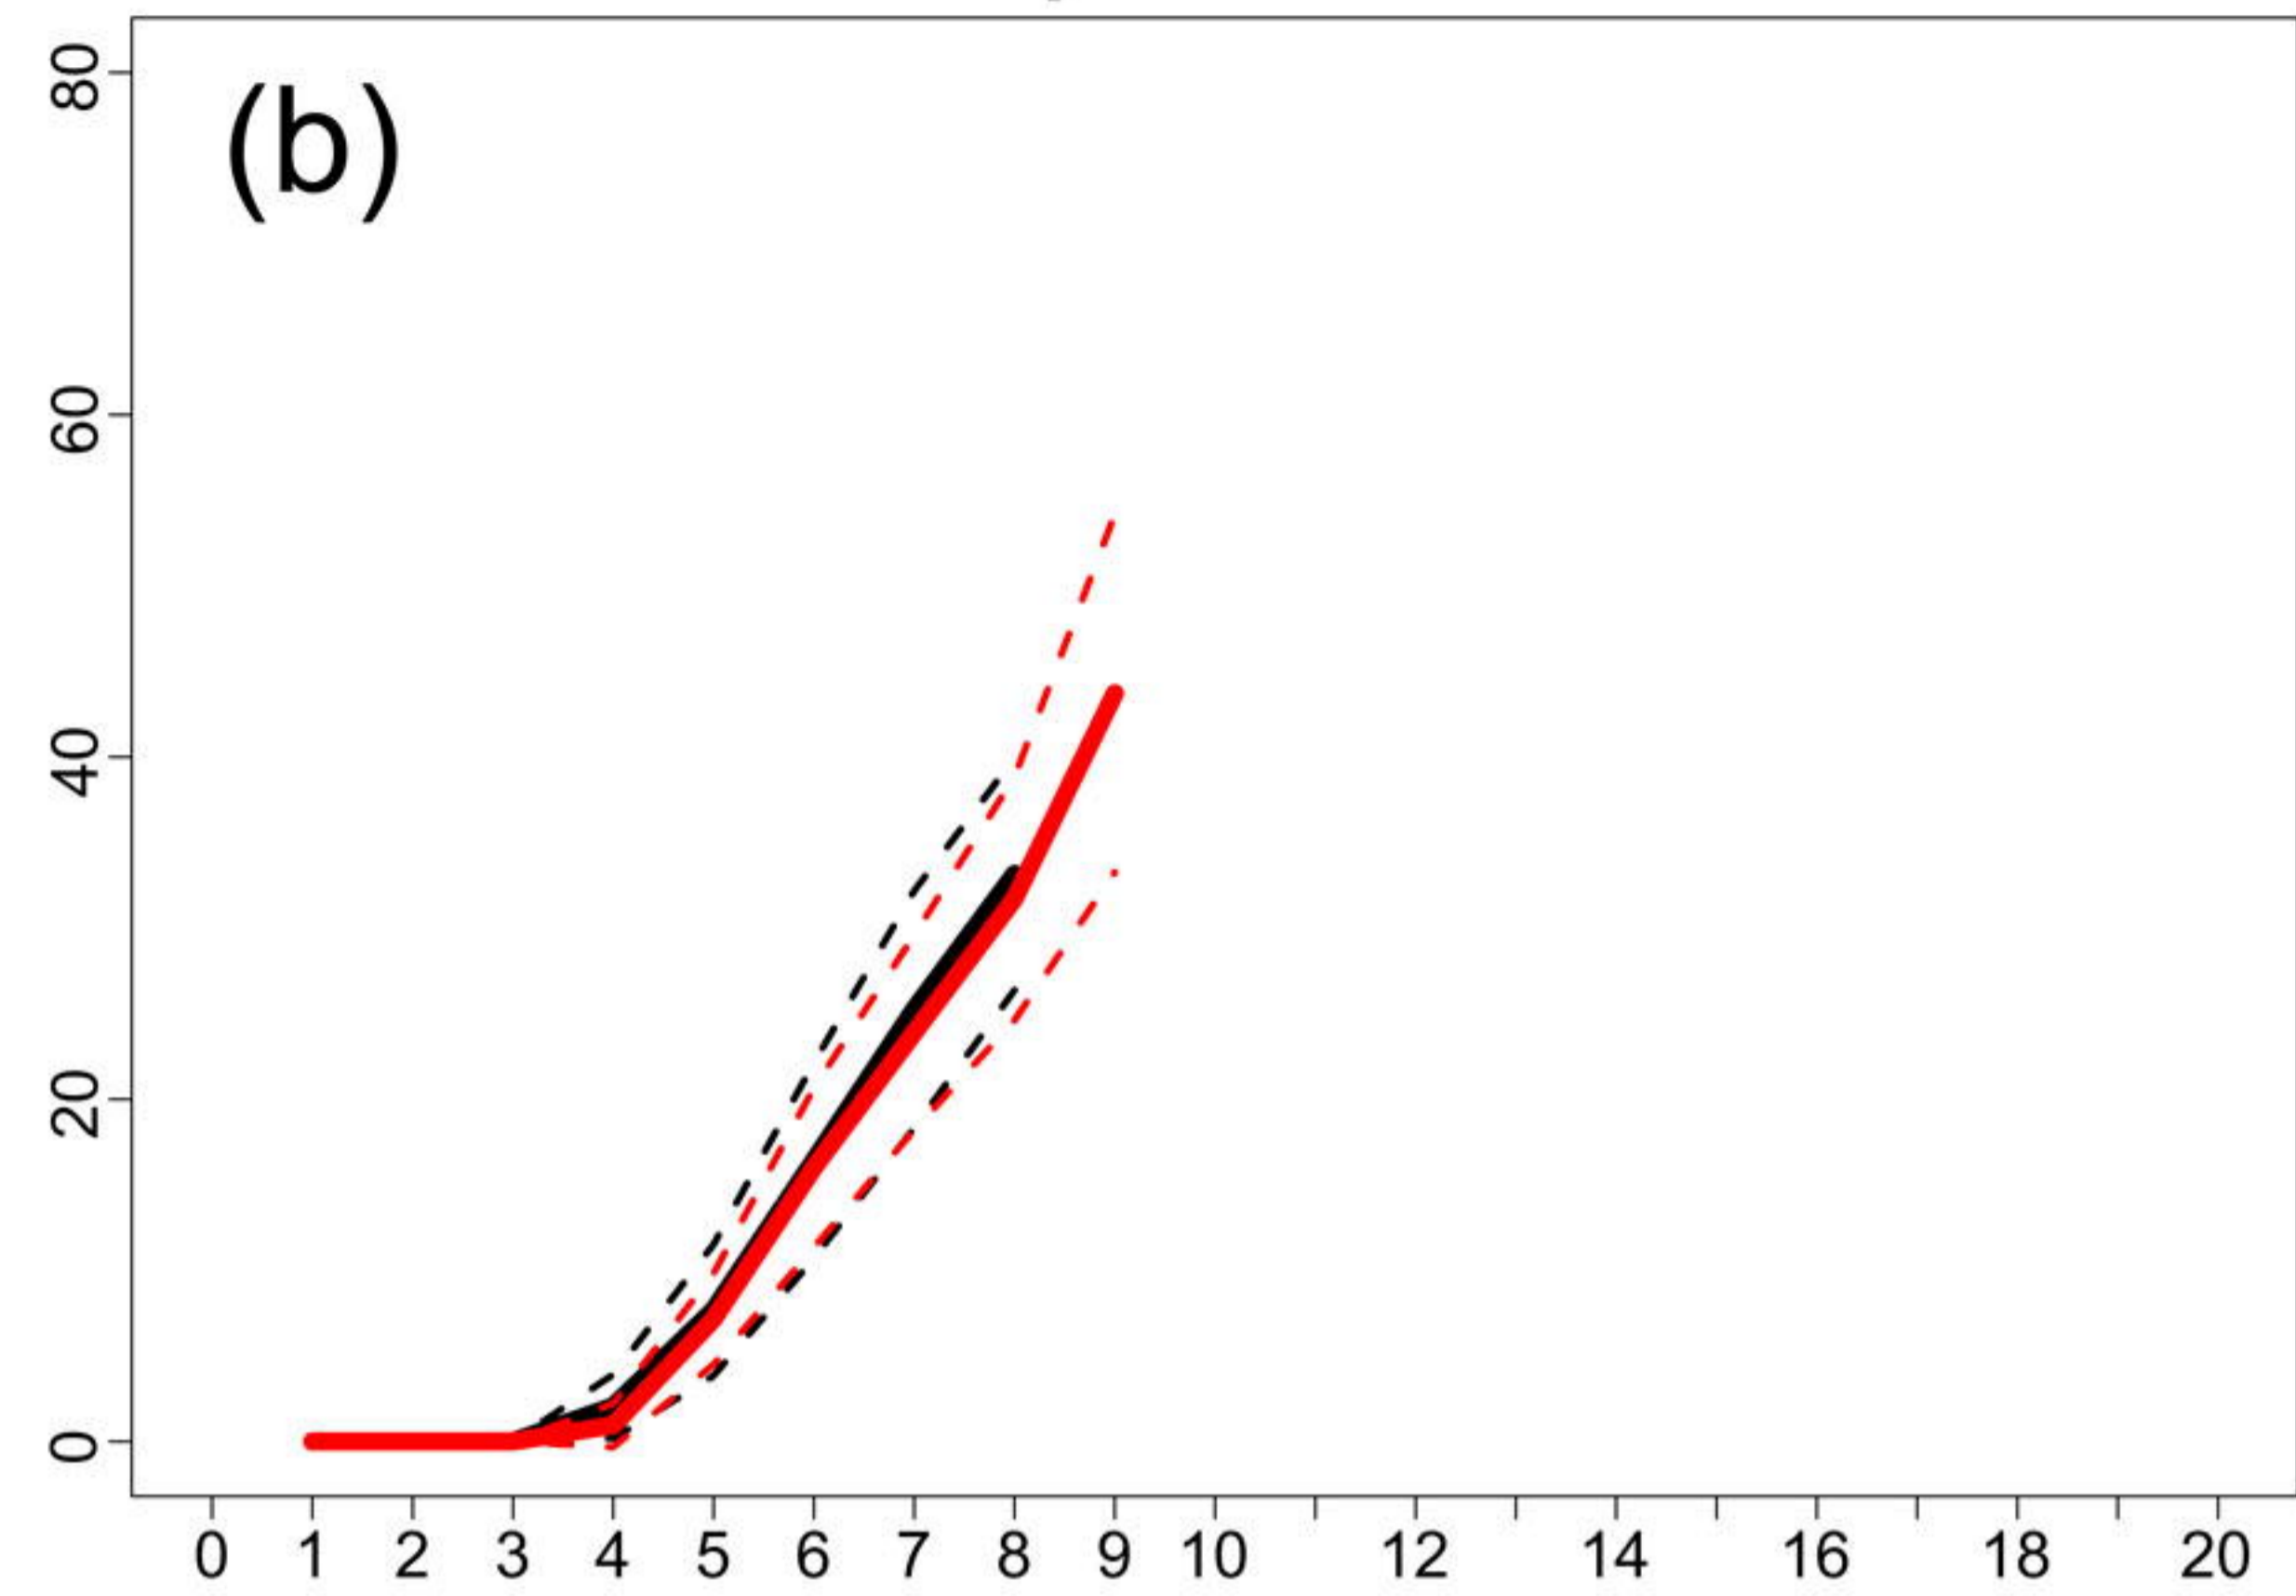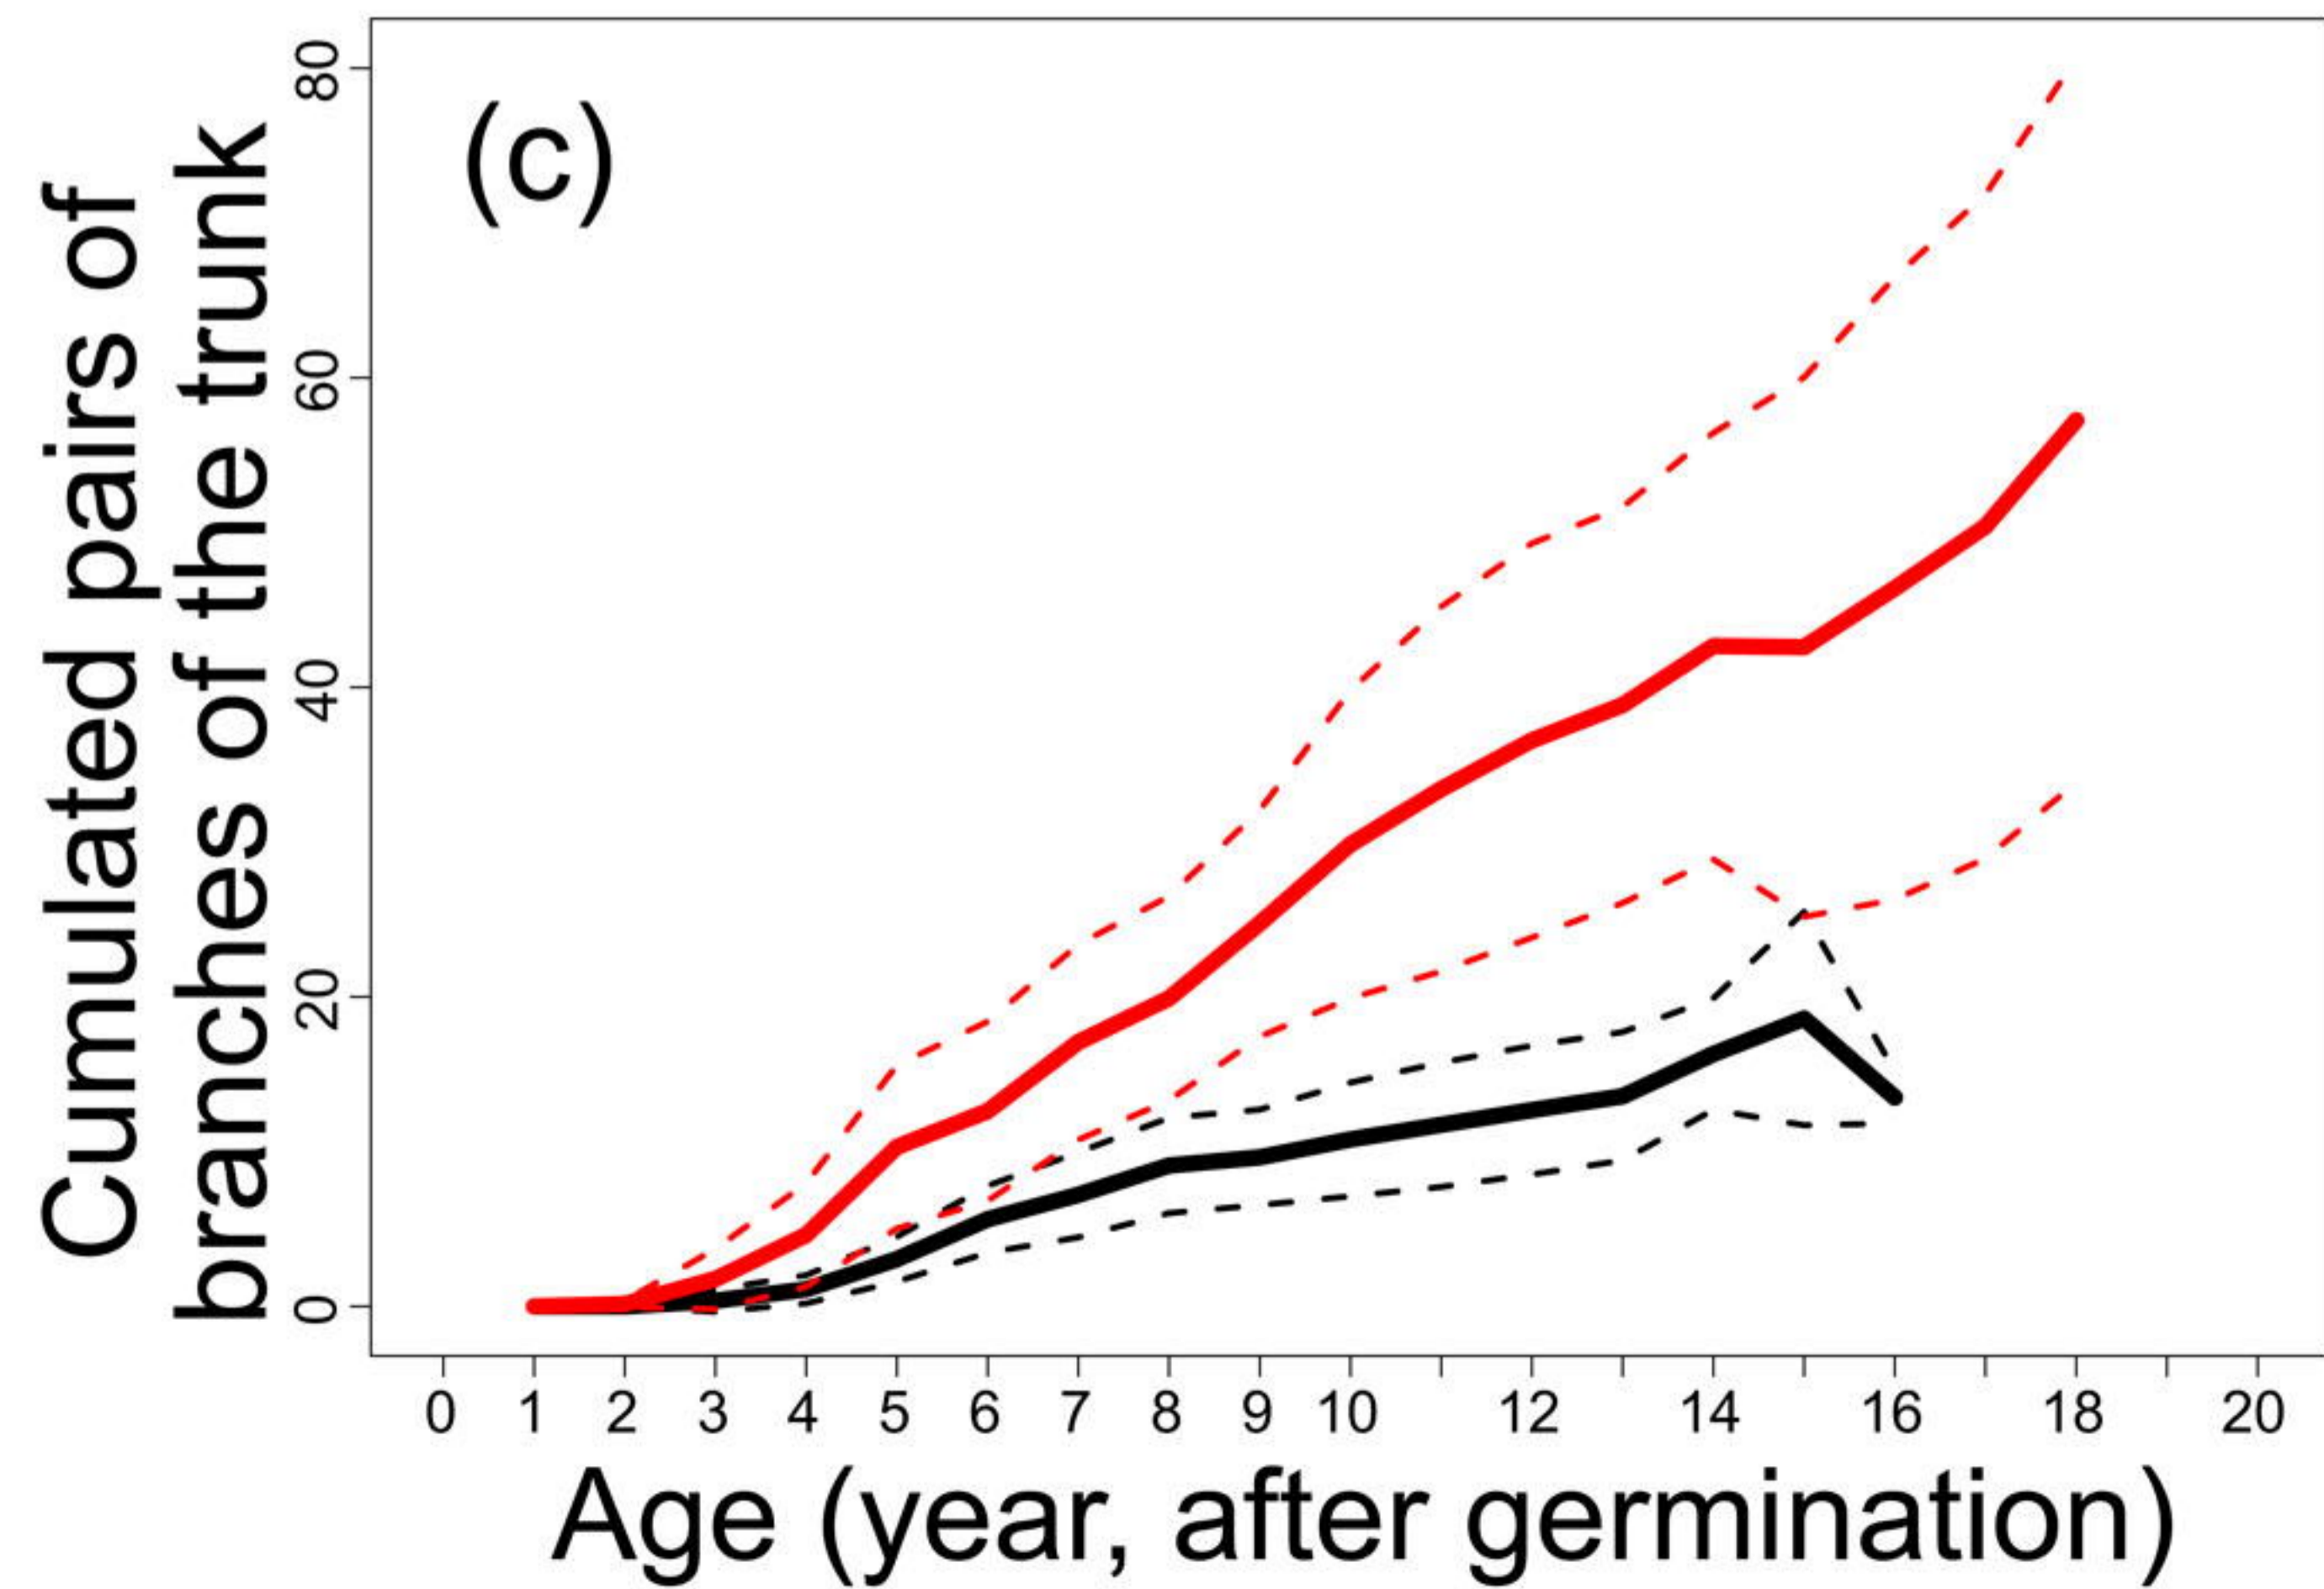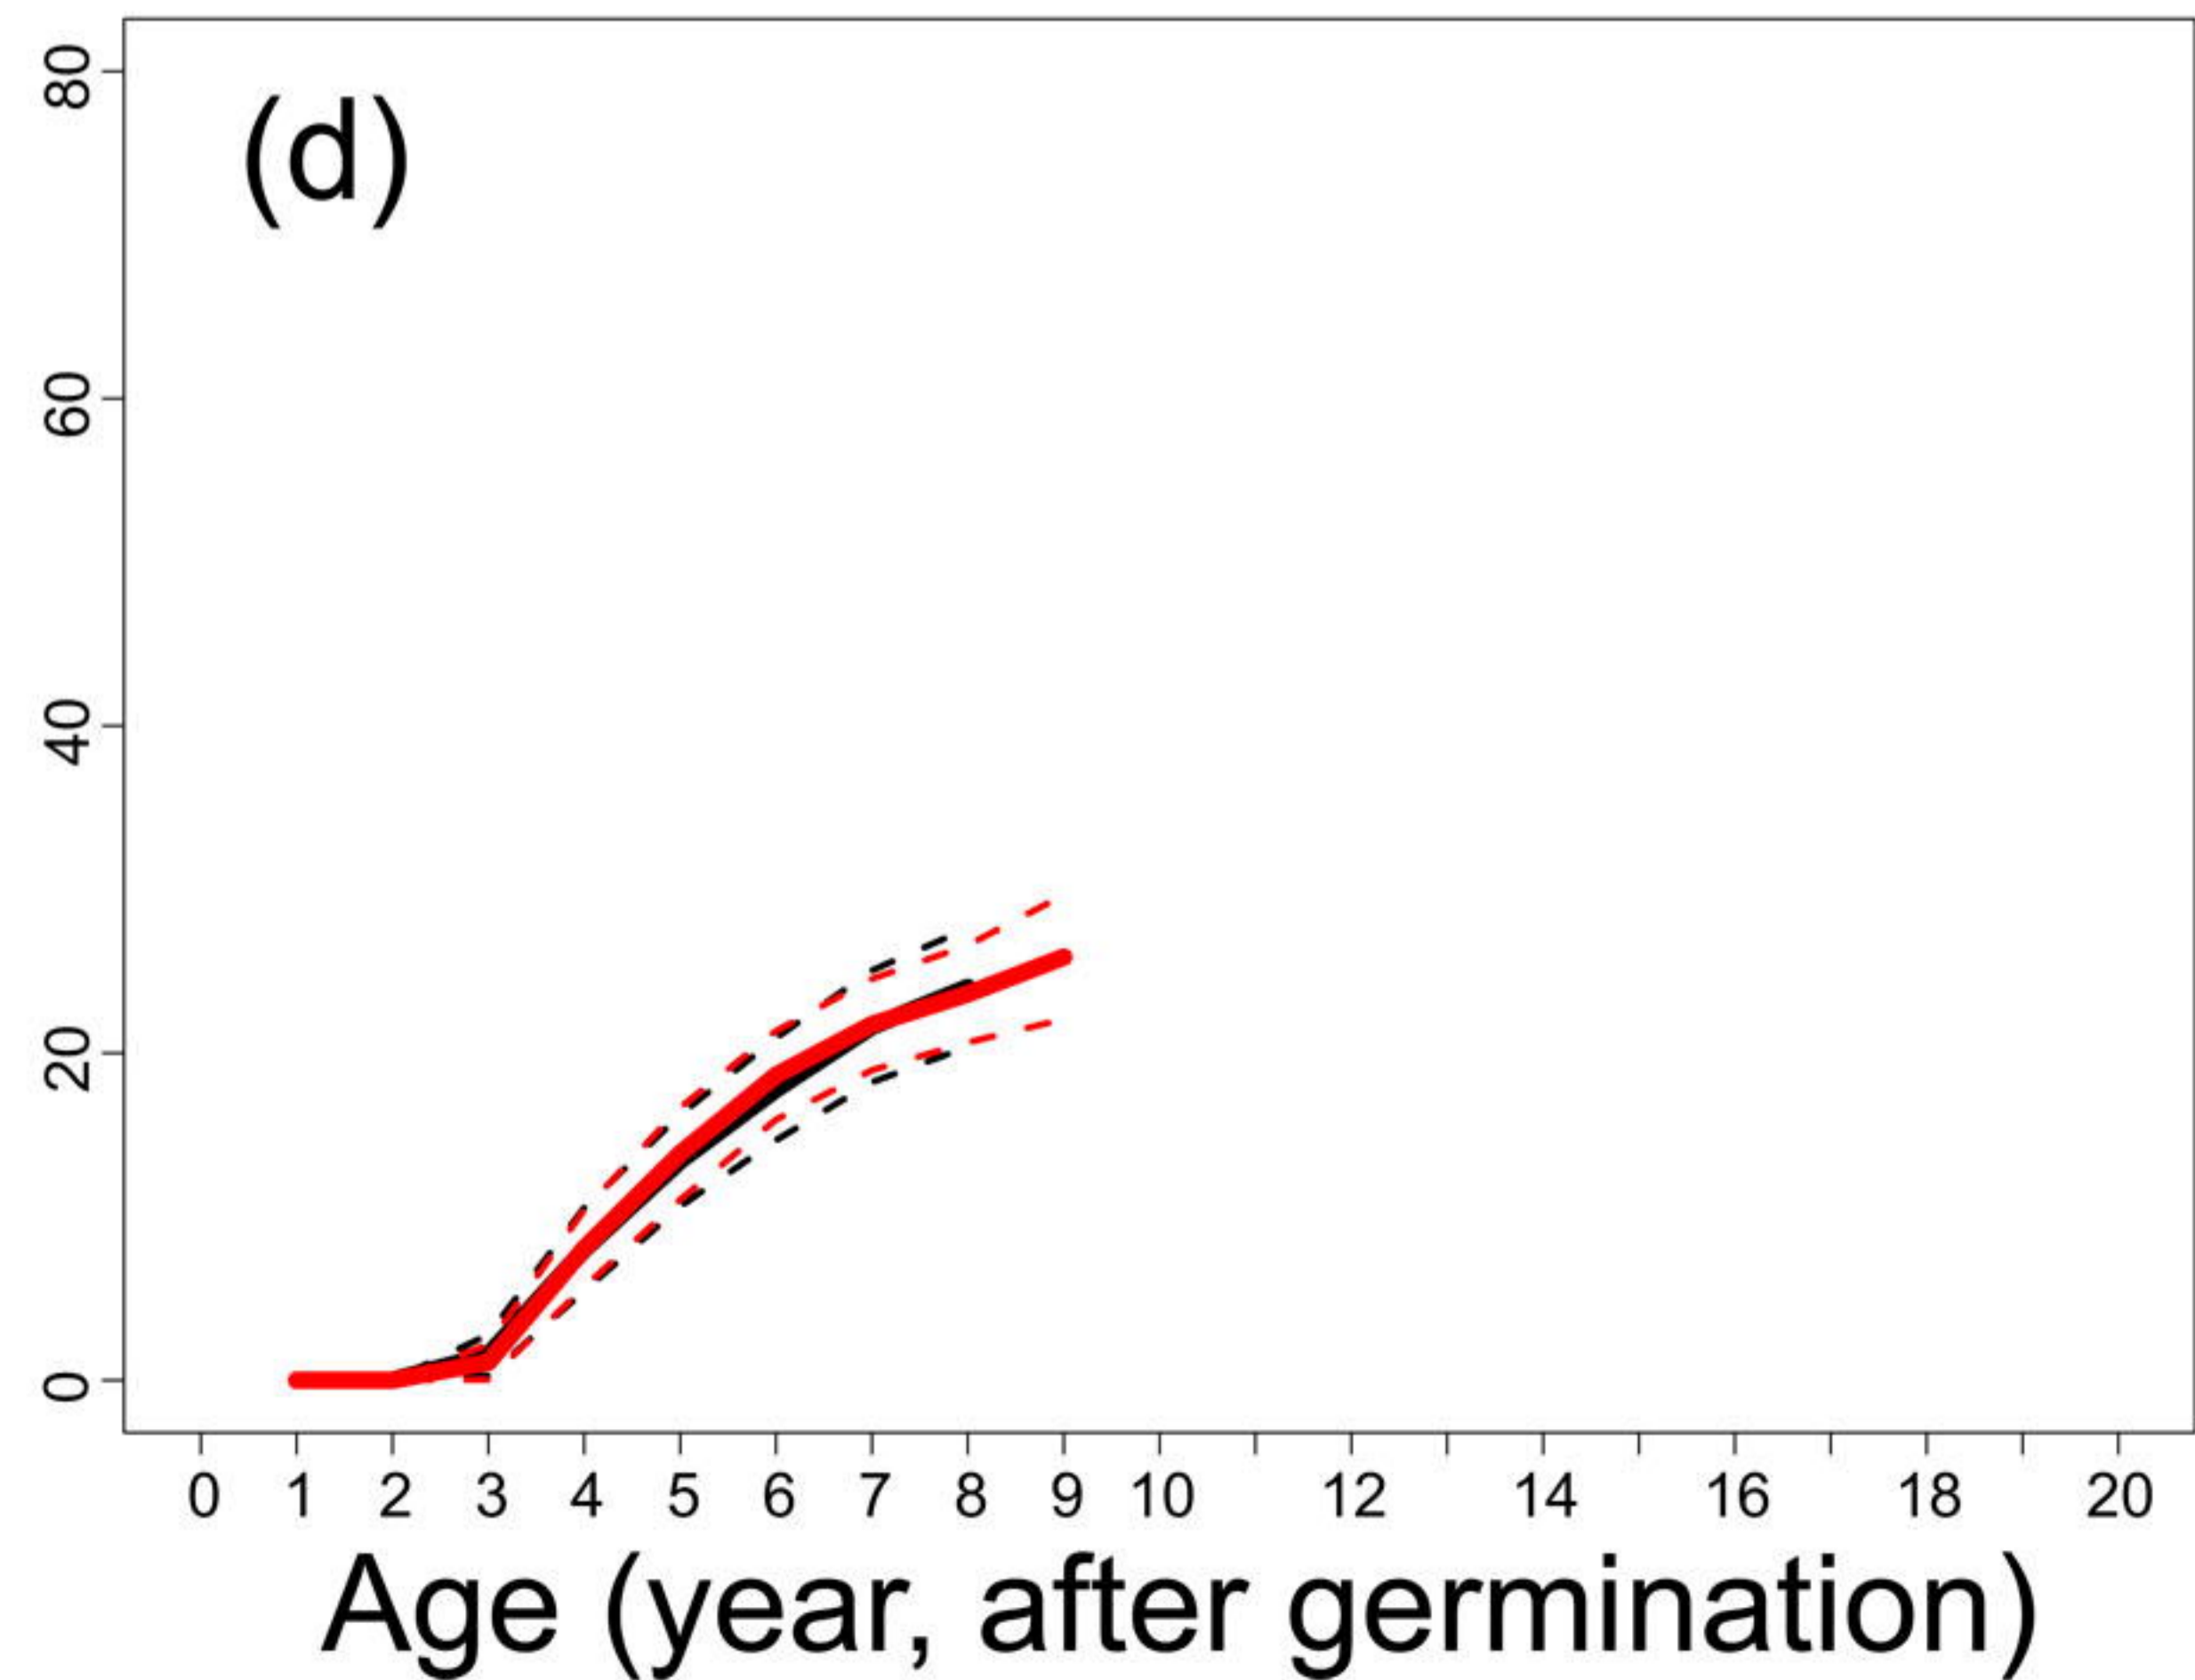

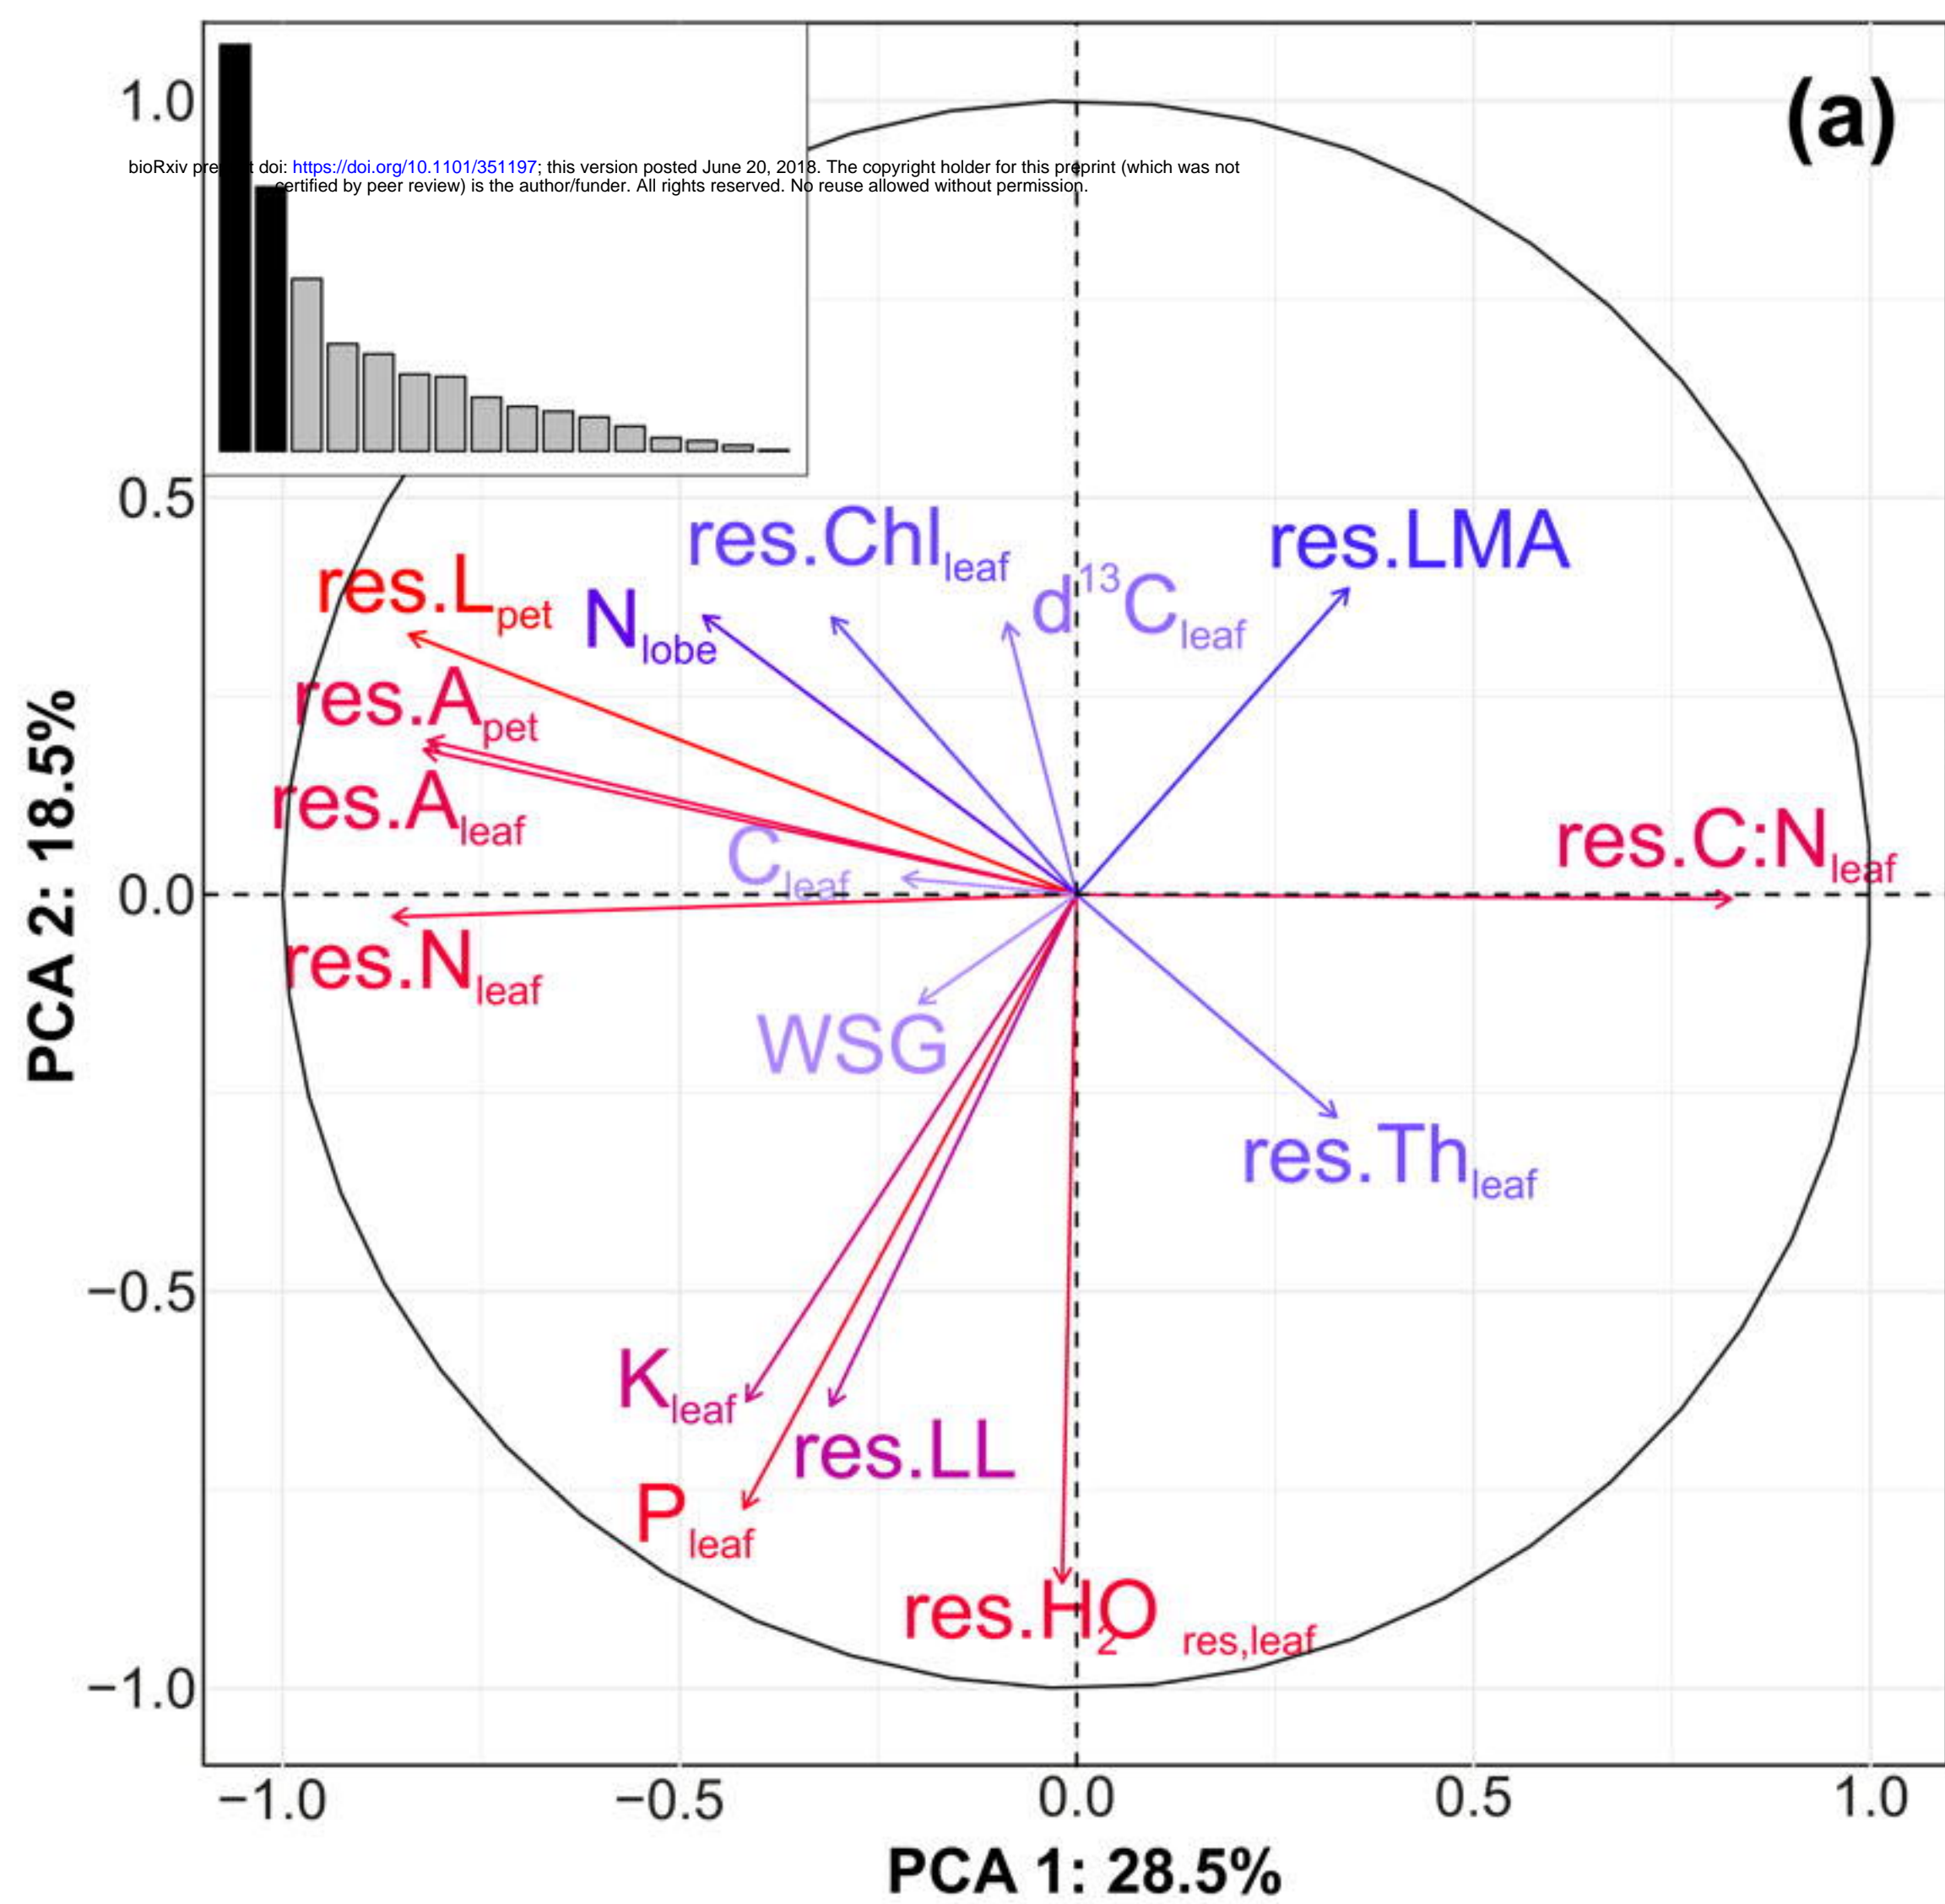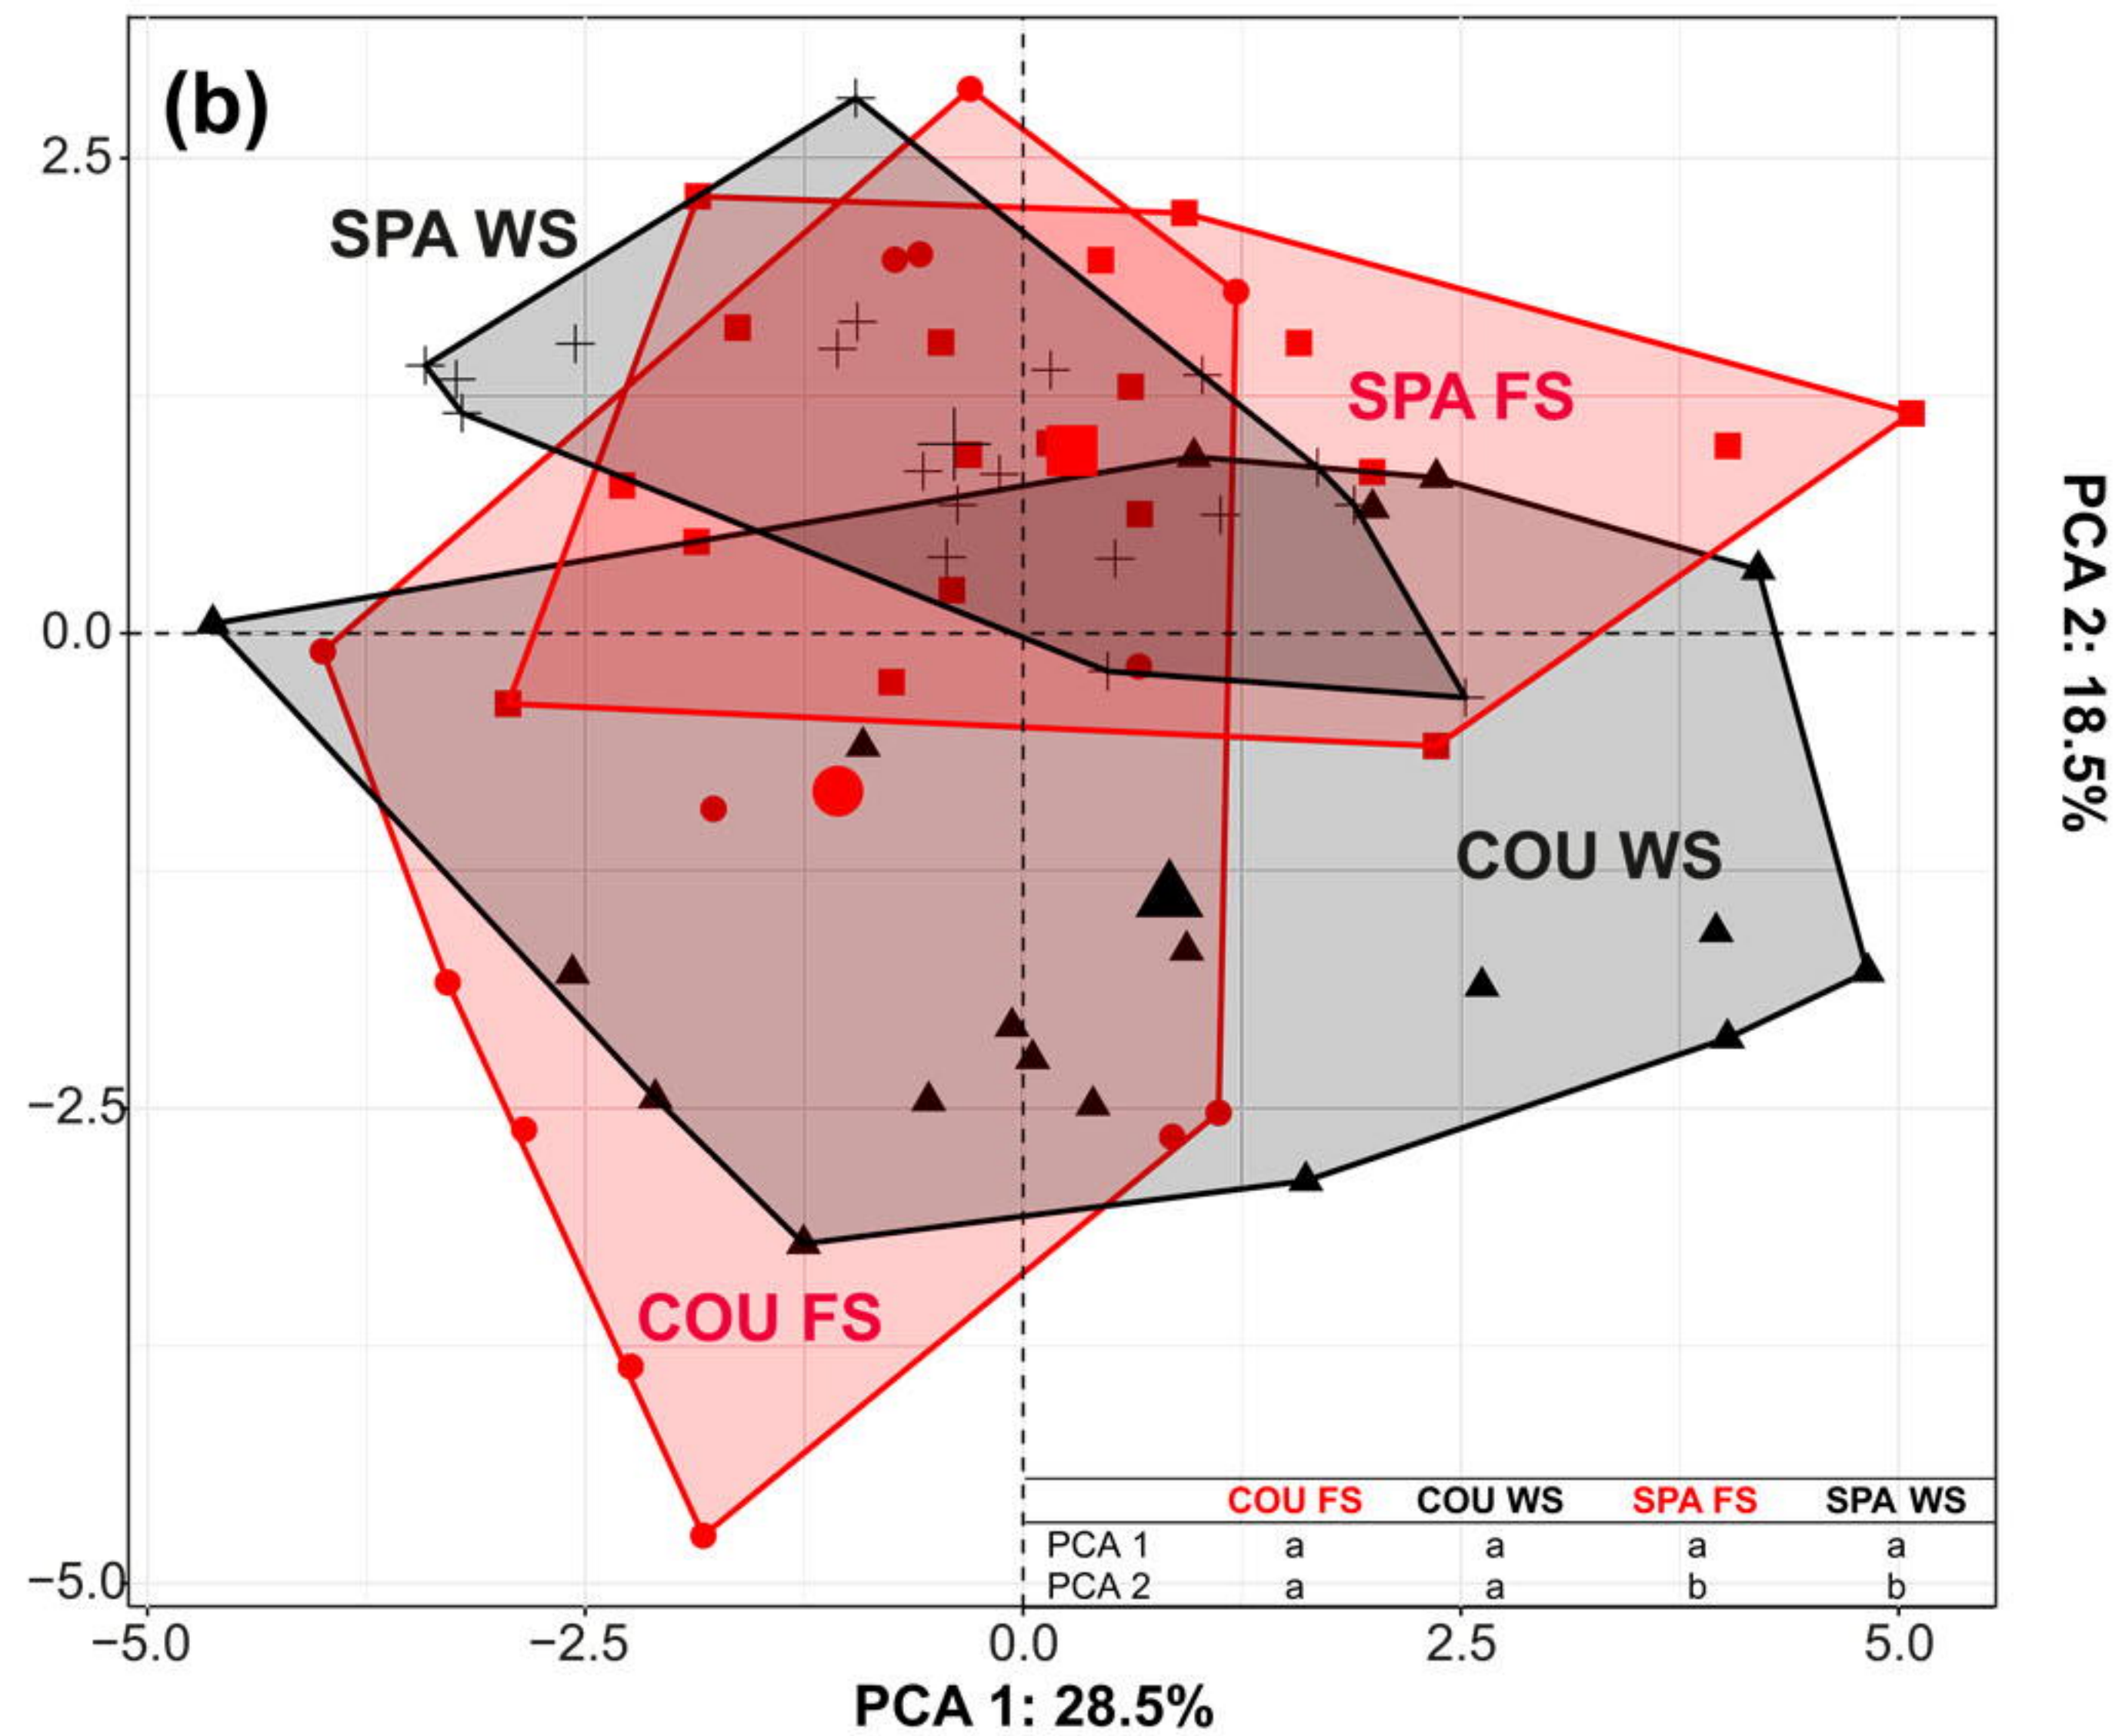

Source: https://www.biorxiv.org/content/10.1101/351197v1.full.pdf
